# Supplementary material for: Di-tert-butyl peroxide as an effective two-carbon unit in oxidative radical cyclization toward 7-methylazolo[1,5-a]pyrimidines
Source: Royal Society of Chemistry journal article supplement (doi:10.1039/d2qo00381c), 2022-01-01

## Supporting Information

### Di-*tert*-butyl peroxide as an effective two-carbon unit in oxidative radical cyclization toward 7-methylazolo[1,5-*a*]pyrimidines

Qinghe Gao,<sup>\*a</sup> Zhenhua Sun,<sup>a</sup> Manman Wu,<sup>a</sup> Yimei Guo,<sup>a</sup> Xinya Han,<sup>\*c</sup> Jufen Yan,<sup>c</sup> Minh Ngoc Ha,<sup>d</sup> Quynh Mai Le,<sup>e</sup> Yongtao Xu<sup>\*b</sup>

<sup>a</sup>*School of Pharmacy, Xinxiang Medical University, Xinxiang, Henan 453003, P. R. China.*

<sup>b</sup>*School of Medical Engineering, Henan International Joint Laboratory of Neural Information analysis and Drug Intelligent Design, Xinxiang Medical University, Xinxiang, Henan 453003, P. R. China.*

<sup>c</sup>*School of Chemistry and Chemical Engineering, Anhui University of Technology, Maanshan, Anhui 243002, P. R. China.*

<sup>d</sup>*VNU Key Laboratory of Advanced Materials for Green Growth, Faculty of Chemistry, University of Science, Vietnam National University, Hanoi 100000, Vietnam.*

<sup>e</sup>*Department of Plant Science, Faculty of Biology, University of Science, Vietnam National University, Hanoi 100000, Vietnam.*

E-mail: gao\_qinghe@xxmu.edu.cn

E-mail: xinyahan@ahut.edu.cn

E-mail: yxu@xxmu.edu.cn

#### Table of Contents

#### page

---

|                                                                     |         |
|---------------------------------------------------------------------|---------|
| 1. General.....                                                     | S2      |
| 2. General procedure for the synthesis of compounds <b>3</b> .....  | S2      |
| 3. The D-labeling experiment and the spectrogram.....               | S2-S3   |
| 4. Experimental details.....                                        | S3-S5   |
| 5. Studying the reaction mechanism.....                             | S5-S6   |
| 6. Characterization data for compounds.....                         | S6-S22  |
| 7. Crystallographic data and molecular structure of <b>3a</b> ..... | S23     |
| 8. References.....                                                  | S23     |
| 9. NMR spectra .....                                                | S24-S74 |

---

## 1. General

Substrates aromatic aldehydes (**1a–1ah**), 3(5)-aminoazoles (**2**), and reagents were commercially available and used without further purification. Aldehydes derivatives (**1ai–1al**) were synthesised using a reported procedure.<sup>1</sup> TLC analysis was performed using pre-coated glass plates. Column chromatography was performed using silica gel (200–300 mesh). <sup>1</sup>H spectra were recorded in CDCl<sub>3</sub> on 400 MHz NMR spectrometers and resonances ( $\delta$ ) are given in parts per million relative to tetramethylsilane. Data are reported as follows: chemical shift, multiplicity (s = singlet, d = doublet, t = triplet, m = multiplet), coupling constants (Hz) and integration. <sup>13</sup>C spectra were recorded in CDCl<sub>3</sub> on 100 MHz NMR spectrometers and resonances ( $\delta$ ) are given in ppm. HRMS analysis of compounds was performed with a time-of-flight mass spectrometer (micrOTOF-Q, Bruker Daltonik, Germany) equipped with an electrospray ionization source. The X-ray crystal-structure determinations of **3a** were obtained on a Bruker SMART APEX CCD system. Melting points were determined using XT-4 apparatus and not corrected. All reactions were heated by a metal sand bath (WATTCAS, LAB-500, <https://www.wattcas.com>).

## 2. General procedure for the synthesis of compounds 4 (4aa as an example)

Benzaldehyde **1a** (53 mg, 0.5 mmol), ethyl 3-amino-1*H*-pyrazole-4-carboxylate **2a** (77.6 mg, 0.5 mmol), DTBP (219 mg, 1.5 mmol) and DCE (2.5 mL) were charged into a pressure tube (35 mL) and were stirred at 130 °C for 10 h. After disappearance of the reactant (monitored by TLC), and added 50 mL water to the mixture, then extracted with EtOAc 3 times (3 × 50 mL), dried over anhydrous Na<sub>2</sub>SO<sub>4</sub> and evaporation. The residue was purified by column chromatography on silica gel (petroleum ether/EtOAc = 8:1) to afford the product **3a** as a yellow solid (119.4 mg, 85% yield).

## 3. The D-labeling experiments and the spectrogram

Benzaldehyde **1a** (53 mg, 0.5 mmol), ethyl 3-amino-1*H*-pyrazole-4-carboxylate **2a** (77.6 mg, 0.5 mmol), DTBP (219 mg, 1.5 mmol), acetone-d<sub>6</sub> (192 mg, 3 mmol) and DCE (2.5 mL) were charged into a pressure tube (35 mL) and were stirred at 130 °C for 10 h. After disappearance of the reactant (monitored by TLC), and added 50 mL water to the mixture, then extracted with EtOAc 3 times (3 × 50 mL), dried over anhydrous Na<sub>2</sub>SO<sub>4</sub> and evaporation. The residue was purified by column chromatography on silica gel (petroleum ether/EtOAc = 8:1) to afford a mixture of **3a** and **3a-d<sub>4</sub>** in a 92% total yield with 1 : 4 ratio. Then, the product was monitored by <sup>1</sup>H NMR (400 MHz), the spectral copies of <sup>1</sup>H NMR was listed in the following. This result reveals that the acetone molecule generated from DTBP was a real source of the methyl group and two-carbon unit of the product.

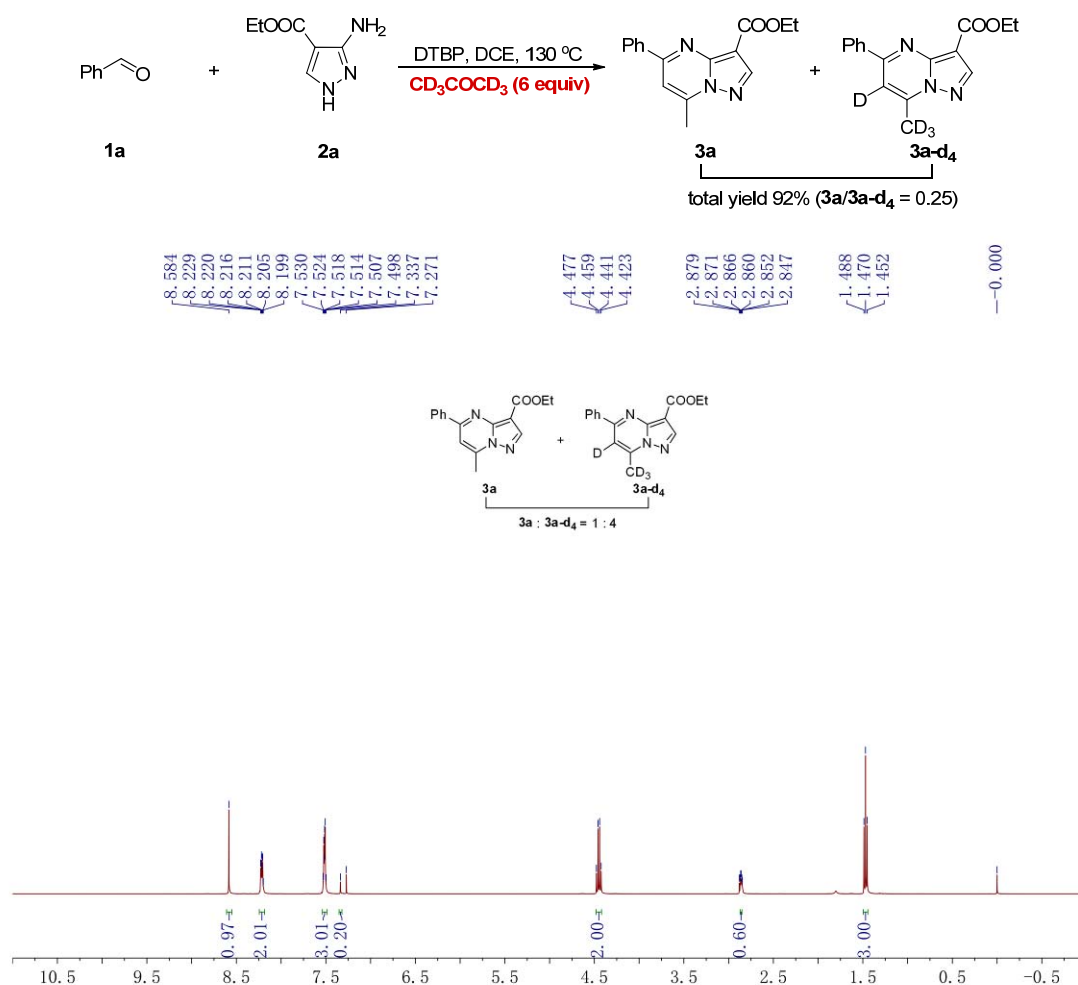

## 4. Experimental details

(1) The methodology applicable for scale-up synthesis (**3a** as an example)

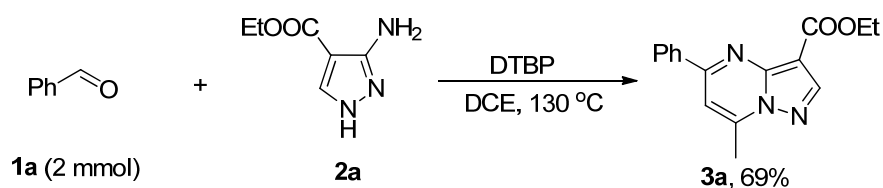

Benzaldehyde **1a** (212 mg, 2 mmol), ethyl 3-amino-1H-pyrazole-4-carboxylate **2a** (310 mg, 2 mmol), DTBP (876 mg, 6 mmol) and DCE (10 mL) were charged into a pressure tube (150 mL) and were stirred at 130 °C for 24 h. After disappearance of the reactant (monitored by TLC), and added 200 mL water to the mixture, then extracted with EtOAc 3 times (3 × 200 mL), dried over anhydrous Na<sub>2</sub>SO<sub>4</sub> and evaporation. The residue was purified by column chromatography on silica gel (petroleum ether/EtOAc = 8:1) to afford the product **3a** as a yellow solid (388 mg, 69% yield).

## (2) Experimental procedure for synthesis of compound 6

Ethyl 7-methyl-5-phenylpyrazolo[1,5-*a*]pyrimidine-3-carboxylate **3a** (140.5 mg, 0.5 mmol) and THF (2 mL) were charged into a pressure tube (15.0 mL). The mixture was stirred at room temperature, then added LiOH (35.9 mg, 1.5 mmol) in water (2 mL) and stirred at same temperature for 12 h. Water was added and the solution was acidified with 6 M aqueous HCl to get precipitation, filtration and drying afforded 7-methyl-5-phenylpyrazolo[1,5-*a*]pyrimidine-3-carboxylic acid as a white solid (112.6 mg, 89% yield).

7-Methyl-5-phenylpyrazolo[1,5-*a*]pyrimidine-3-carboxylic acid (50.6 mg, 0.2 mmol), estrone (54.1 g, 0.2 mmol), 1-(3-dimethylaminopropyl)-3-ethylcarbodiimide hydrochloride (42.2 g, 1.1 mmol), *N,N*-dimethyl-4-aminopyridine (6.1 mg, 0.25 mmol) and CH<sub>2</sub>Cl<sub>2</sub> (2 mL) were charged into a round-bottom flask (50 mL). After stirred at room temperature for 4 h, the reaction was quenched with 20 mL of saturated NaHCO<sub>3</sub> (aq.) and then extracted with CH<sub>2</sub>Cl<sub>2</sub> (10 mL × 3). The combined organic layer was dried over Na<sub>2</sub>SO<sub>4</sub>, filtrated, and concentrated under reduced pressure. The residue was purified by chromatography on silica gel (petroleum ether/EtOAc = 2:1) to afford the product **6** as a white solid (95 mg, 94% yield).

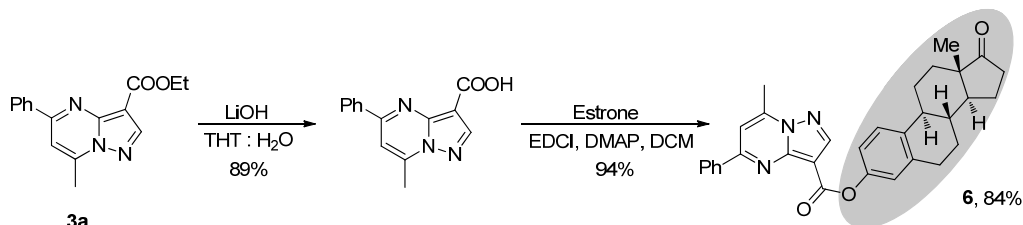

## (3) Experimental procedure for synthesis of compound 7

Using Deng's group reported conditions,<sup>2</sup> A 35 mL pressure tube was charged with ethyl 7-methyl-5-phenylpyrazolo[1,5-*a*]pyrimidine-3-carboxylate **3a** (56.2 mg, 0.2 mmol), benzimidamide hydrochloride (62.6 mg, 0.4 mmol), S (32 mg, 1.0 mmol), K<sub>3</sub>PO<sub>4</sub> (127.4 mg, 0.6 mmol), and DMSO (0.6 mL) under air. The reaction vessel was stirred at 130 °C for 12 h. After cooling to room temperature, the volatiles were removed under reduced pressure. The residue was purified by column chromatography on silica gel (petroleum ether/EtOAc = 30:1) to yield the desired product **7** as white solid (63.2 mg, yield 74%).

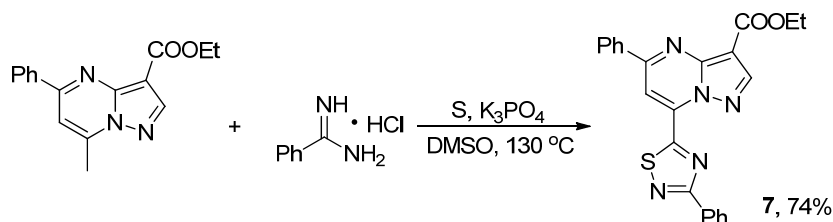

## (4) the control experiment: (Scheme 5c)

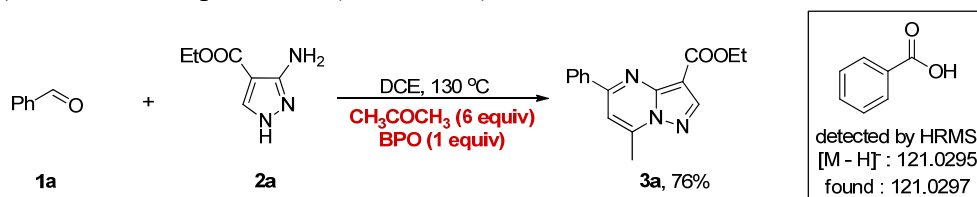

Benzaldehyde **1a** (53 mg, 0.5 mmol), ethyl 3-amino-1*H*-pyrazole-4-carboxylate **2a** (77.6 mg, 0.5 mmol), BPO (121 mg, 0.5 mmol), acetone (174 mg, 3 mmol) and DCE were charged

into a pressure tube (35 mL) and were stirred at 130 °C for 10 h. After disappearance of the reactant (monitored by TLC), and added 50 mL water to the mixture, then extracted with EtOAc 3 times (3 × 50 mL), dried over anhydrous Na<sub>2</sub>SO<sub>4</sub> and evaporation. The residue was purified by column chromatography on silica gel (petroleum ether/EtOAc = 8:1) to afford the product **3a** as a yellow solid (106.8 mg, 76% yield). Moreover, the formation of benzoic acid was proved by HRMS. HRMS (ESI): m/z [M – H]<sup>–</sup> calcd for C<sub>7</sub>H<sub>5</sub>O<sub>2</sub>: 121.0295; found: 121.0297.

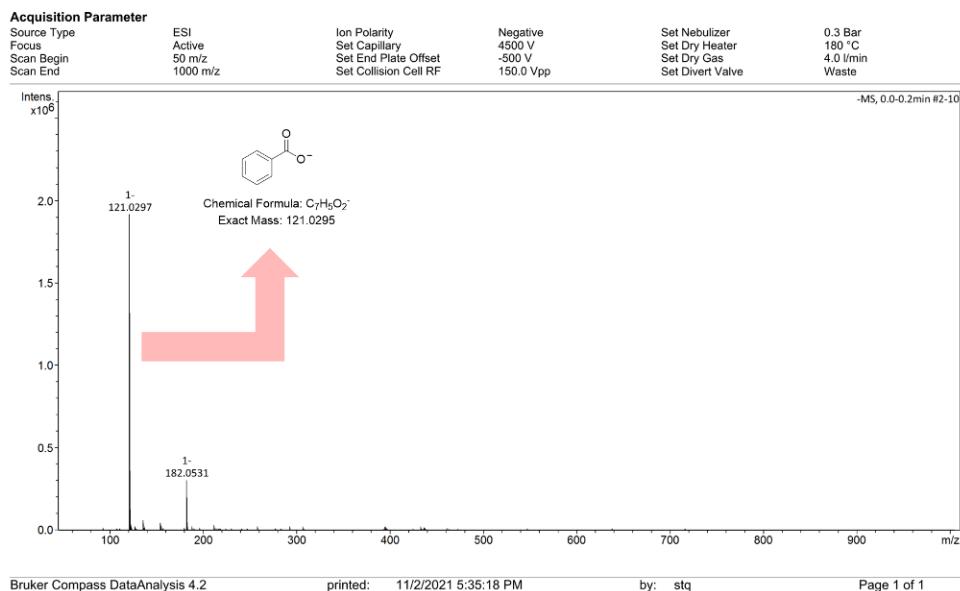

## 5. Studying the reaction mechanism

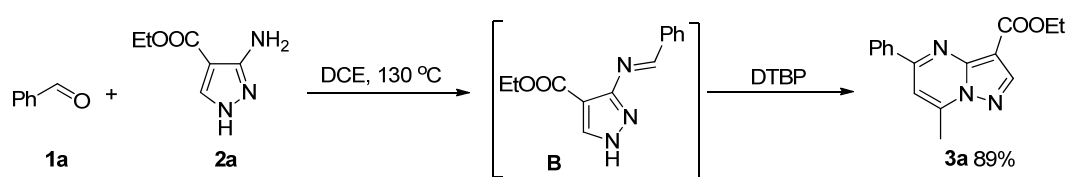

Benzaldehyde **1a** (53 mg, 0.5 mmol), ethyl 3-amino-1*H*-pyrazole-4-carboxylate **2a** (77.6 mg, 0.5 mmol) and DCE (2.5 mL) were charged into a pressure tube (35 mL) and were stirred at 130 °C for 5 h. The condensation imine (**B**) rather than annulation product (**3a**) was detected by HRMS. HRMS (ESI): m/z [M + H]<sup>+</sup> calcd for C<sub>13</sub>H<sub>14</sub>N<sub>3</sub>O<sub>2</sub>: 244.1081; found: 244.1076. [M + Na]<sup>+</sup> calcd for C<sub>13</sub>H<sub>13</sub>N<sub>3</sub>NaO<sub>2</sub>: 266.0900; found: 266.0891. Then, DTBP (219 mg, 1.5 mmol) was added without further purification, afterward, the mixture was stirred at 130 °C for 10 h. Added 50 mL water to the mixture, then extracted with EtOAc 3 times (3 × 50 mL), dried over anhydrous Na<sub>2</sub>SO<sub>4</sub> and evaporation. The residue was purified by column chromatography on silica gel (petroleum ether/EtOAc = 8:1) to afford the product **3a** as a yellow solid (125 mg, 89% yield).

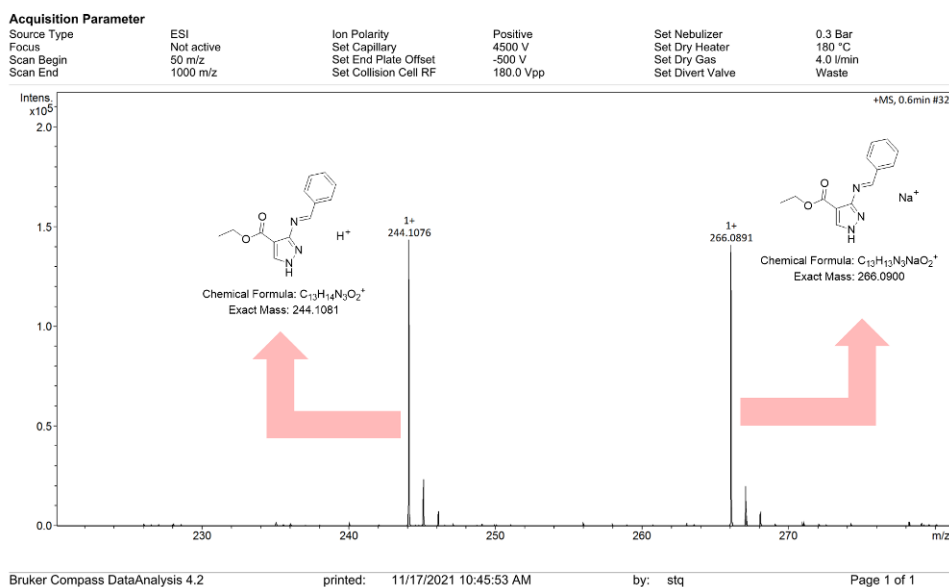

## 6. Characterization data for compounds

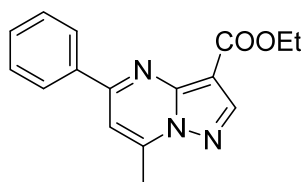

### ethyl 7-methyl-5-phenylpyrazolo[1,5-*a*]pyrimidine-3-carboxylate (3a) (CAS: 140706-36-1):

Yield 85% (119.4 mg; petroleum ether/EtOAc = 8:1); yellow solid; mp 121–123 °C;  $^1H$  NMR (400 MHz,  $CDCl_3$ ):  $\delta$  (ppm) 8.58 (s, 1H), 8.24–8.17 (m, 2H), 7.53–7.47 (m, 3H), 7.32 (s, 1H), 4.45 (q,  $J = 7.2$  Hz, 2H), 2.86 (s, 3H), 1.47 (t,  $J = 7.2$  Hz, 3H);  $^{13}C$  NMR (100 MHz,  $CDCl_3$ ):  $\delta$  (ppm) 162.8, 158.5, 147.8, 147.4, 147.1, 136.4, 130.9, 128.8, 127.5, 106.3, 102.9, 60.1, 17.6, 14.4; HRMS (ESI):  $m/z$   $[M + Na]^+$  calcd for  $C_{16}H_{15}N_3NaO_2$ : 304.1056; found: 304.1056.

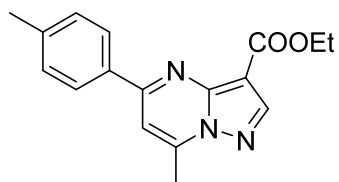

### ethyl 7-methyl-5-(*p*-tolyl)pyrazolo[1,5-*a*]pyrimidine-3-carboxylate (3b):

Yield 84% (124 mg; petroleum ether/EtOAc = 10:1); orange solid; mp 119–121 °C;  $^1H$  NMR (400 MHz,  $CDCl_3$ ):  $\delta$  (ppm) 8.56 (s, 1H), 8.10 (d,  $J = 8.4$  Hz, 2H), 7.3–7.28 (m, 3H), 4.44 (q,  $J = 7.2$  Hz, 2H), 2.84 (s, 3H), 2.42 (s, 3H), 1.47 (t,  $J = 7.0$  Hz, 3H);  $^{13}C$  NMR (100 MHz,  $CDCl_3$ ):  $\delta$  (ppm) 162.9, 158.5, 147.9, 147.3, 146.8, 141.4, 133.6, 129.6, 127.5, 106.1, 102.7, 60.1, 21.4, 17.5, 14.4; HRMS (ESI):  $m/z$   $[M + Na]^+$  calcd for  $C_{17}H_{17}N_3NaO_2$ : 318.1213; found: 318.1214.

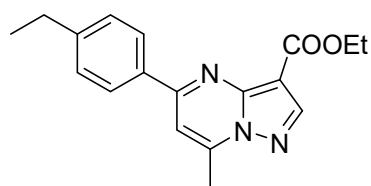

**ethyl 5-(4-ethylphenyl)-7-methylpyrazolo[1,5-a]pyrimidine-3-carboxylate (3c) (CAS: 1403602-81-2):**

Yield 80% (123.6 mg; petroleum ether/EtOAc = 10:1); yellow solid; mp 76–78 °C; <sup>1</sup>H NMR (400 MHz, CDCl<sub>3</sub>): δ (ppm) 8.57 (s, 1H), 8.15 (d, *J* = 8.4 Hz, 2H), 7.34 (d, *J* = 8.4 Hz, 2H), 7.32 (s, 1H), 4.45 (q, *J* = 7.2 Hz, 2H), 2.87 (s, 3H), 2.73 (q, *J* = 7.6 Hz, 2H), 1.47 (t, *J* = 7.2 Hz, 3H), 1.29 (t, *J* = 7.6 Hz, 3H); <sup>13</sup>C NMR (100 MHz, CDCl<sub>3</sub>): δ (ppm) 162.9, 158.7, 148.0, 147.7, 147.4, 146.9, 134.0, 128.5, 127.7, 106.2, 102.8, 60.1, 28.8, 17.6, 15.3, 14.5; HRMS (ESI): *m/z* [M + Na]<sup>+</sup> calcd for C<sub>18</sub>H<sub>19</sub>N<sub>3</sub>NaO<sub>2</sub>: 332.1369; found: 332.1368.

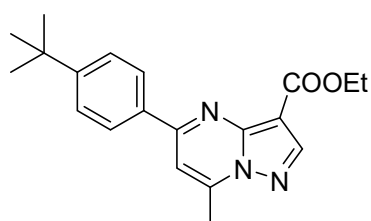

**ethyl 5-(4-(tert-butyl)phenyl)-7-methylpyrazolo[1,5-a]pyrimidine-3-carboxylate (3d):**

Yield 60% (101 mg; petroleum ether/EtOAc = 8:1); yellow solid; mp 139–141 °C; <sup>1</sup>H NMR (400 MHz, CDCl<sub>3</sub>): δ (ppm) 8.57 (s, 1H), 8.15 (d, *J* = 8.4 Hz, 2H), 7.53 (d, *J* = 8.4 Hz, 2H), 7.32 (s, 1H), 4.45 (q, *J* = 7.2 Hz, 2H), 2.87 (s, 3H), 1.47 (t, *J* = 7.0 Hz, 3H), 1.37 (s, 9H); <sup>13</sup>C NMR (100 MHz, CDCl<sub>3</sub>): δ (ppm); 163.0, 158.6, 154.5, 147.9, 147.5, 146.9, 133.8, 127.4, 125.9, 106.2, 102.8, 60.1, 34.9, 31.1, 17.6, 14.5. HRMS (ESI): *m/z* [M + Na]<sup>+</sup> calcd for C<sub>20</sub>H<sub>23</sub>N<sub>3</sub>NaO<sub>2</sub>: 360.1682; found: 360.1681.

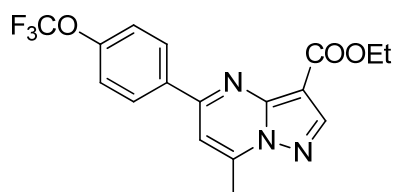

**ethyl 7-methyl-5-(4-(trifluoromethoxy)phenyl)pyrazolo[1,5-a]pyrimidine-3-carboxylate (3e):**

Yield 66% (120.5 mg; petroleum ether/EtOAc = 8:1); yellow solid; mp 129–132 °C; <sup>1</sup>H NMR (400 MHz, CDCl<sub>3</sub>): δ (ppm) 8.59 (s, 1H), 8.29–8.22 (m, 2H), 7.35 (d, *J* = 8.0 Hz, 2H), 7.30 (s, 1H), 4.45 (q, *J* = 7.2 Hz, 2H), 2.89 (s, 3H), 1.46 (t, *J* = 7.2 Hz, 3H); <sup>13</sup>C NMR (100 MHz, CDCl<sub>3</sub>): δ (ppm) 162.8, 157.1, 151.2 (q, *J*<sub>C-F</sub> = 1.8 Hz), 147.8 (q, *J*<sub>C-F</sub> = 15.4 Hz), 147.7, 147.4, 135.1, 129.3, 120.3 (q, *J*<sub>C-F</sub> = 258.3 Hz), 121.0, 106.1, 103.2, 60.3, 17.7, 14.5; HRMS (ESI): *m/z* [M + H]<sup>+</sup> calcd for C<sub>17</sub>H<sub>15</sub>F<sub>3</sub>N<sub>3</sub>O<sub>3</sub>: 366.1060; found: 366.1062.

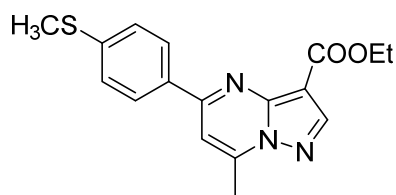

**ethyl 7-methyl-5-(4-(methylthio)phenyl)pyrazolo[1,5-*a*]pyrimidine-3-carboxylate (3f):**

Yield 72% (117.7 mg; petroleum ether/EtOAc = 10:1); yellow solid; mp 121–123 °C; <sup>1</sup>H NMR (400 MHz, CDCl<sub>3</sub>): δ (ppm) 8.55 (s, 1H), 8.15–8.09 (m, 2H), 7.34–7.29 (m, 2H), 7.26 (s, 1H), 4.44 (q, *J* = 7.2 Hz, 2H), 2.85 (s, 3H), 2.54 (s, 3H), 1.47 (t, *J* = 7.2 Hz, 3H); <sup>13</sup>C NMR (100 MHz, CDCl<sub>3</sub>): δ (ppm) 162.8, 157.8, 147.9, 147.4, 146.9, 143.0, 132.7, 127.8, 125.7, 105.8, 102.7, 60.1, 17.6, 14.9, 14.5; HRMS (ESI): *m/z* [M + H]<sup>+</sup> calcd for C<sub>17</sub>H<sub>18</sub>N<sub>3</sub>O<sub>2</sub>S: 328.1114; found: 328.1116.

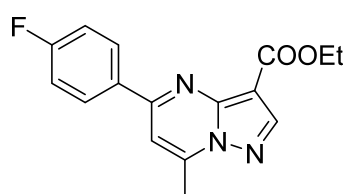

**ethyl 5-(4-fluorophenyl)-7-methylpyrazolo[1,5-*a*]pyrimidine-3-carboxylate (3g):**

Yield 80% (119.6 mg; petroleum ether/EtOAc = 12:1); white solid; mp 145–147 °C; <sup>1</sup>H NMR (400 MHz, CDCl<sub>3</sub>): δ (ppm) 8.58 (s, 1H), 8.26–8.20 (m, 2H), 7.29 (s, 1H), 7.23–7.17 (m, 2H), 4.45 (q, *J* = 7.2 Hz, 2H), 2.88 (s, 3H), 1.46 (t, *J* = 7.2 Hz, 3H); <sup>13</sup>C NMR (100 MHz, CDCl<sub>3</sub>): δ (ppm) 164.7 (d, *J*<sub>C-F</sub> = 252.0 Hz), 162.8, 157.5, 147.9, 147.6, 147.2, 132.7 (d, *J*<sub>C-F</sub> = 3.0 Hz), 129.7 (d, *J*<sub>C-F</sub> = 8.8 Hz), 116.0 (d, *J*<sub>C-F</sub> = 21.8 Hz), 106.0, 103.0, 60.2, 17.6, 14.5; HRMS (ESI): *m/z* [M + Na]<sup>+</sup> calcd for C<sub>16</sub>H<sub>14</sub>FN<sub>3</sub>NaO<sub>2</sub>: 322.0962; found: 322.0963.

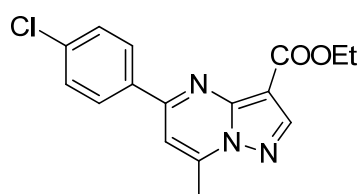

**ethyl 5-(4-chlorophenyl)-7-methylpyrazolo[1,5-*a*]pyrimidine-3-carboxylate (3h) (CAS: 871571-83-4):**

Yield 76% (120 mg; petroleum ether/EtOAc = 8:1); yellow solid; mp 117–119 °C; <sup>1</sup>H NMR (400 MHz, CDCl<sub>3</sub>): δ (ppm) 8.59 (s, 1H), 8.20–8.14 (m, 2H), 7.52–7.46 (m, 2H), 7.30 (s, 1H), 4.45 (q, *J* = 7.2 Hz, 2H), 2.89 (s, 3H), 1.46 (t, *J* = 7.2 Hz, 3H); <sup>13</sup>C NMR (100 MHz, CDCl<sub>3</sub>): δ (ppm) 162.8, 157.3, 147.9, 147.6, 147.3, 137.3, 135.0, 129.2, 128.9, 106.0, 103.1, 60.2, 17.7, 14.5; HRMS (ESI): *m/z* [M + Na]<sup>+</sup> calcd for C<sub>16</sub>H<sub>14</sub>ClN<sub>3</sub>NaO<sub>2</sub>: 338.0667; found: 338.0665.

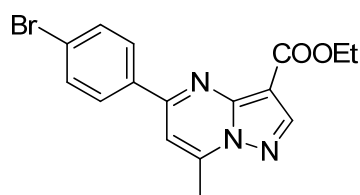



**ethyl 5-(4-bromophenyl)-7-methylpyrazolo[1,5-*a*]pyrimidine-3-carboxylate (3i):**

Yield 78% (140.4 mg; petroleum ether/EtOAc = 8:1); yellow solid; mp 145–147 °C; <sup>1</sup>H NMR (400 MHz, CDCl<sub>3</sub>): δ (ppm) 8.58 (s, 1H), 8.08 (d, *J* = 8.4 Hz, 2H), 7.63 (d, *J* = 8.4 Hz, 2H), 7.28 (s, 1H), 4.44 (q, *J* = 7.2 Hz, 2H), 2.88 (s, 3H), 1.46 (t, *J* = 7.0 Hz, 3H); <sup>13</sup>C NMR (100 MHz, CDCl<sub>3</sub>): δ (ppm) 162.7, 157.3, 147.8, 147.6, 147.3, 135.3, 132.1, 129.0, 125.8, 105.9, 103.1, 60.2, 17.6, 14.5; HRMS (ESI): *m/z* [M + Na]<sup>+</sup> calcd for C<sub>16</sub>H<sub>14</sub>BrN<sub>3</sub>NaO<sub>2</sub>: 382.0162; found: 382.0164.

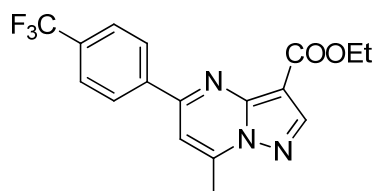

**ethyl 7-methyl-5-(4-(trifluoromethyl)phenyl)pyrazolo[1,5-*a*]pyrimidine-3-carboxylate (3j):**

Yield 68% (118.7 mg; petroleum ether/EtOAc = 8:1); white solid; mp 161–163 °C; <sup>1</sup>H NMR (400 MHz, CDCl<sub>3</sub>): δ (ppm) 8.60 (s, 1H), 8.30 (d, *J* = 8.0 Hz, 2H), 7.75 (d, *J* = 8.0 Hz, 2H), 7.34 (s, 1H), 4.45 (q, *J* = 7.2 Hz, 2H), 2.89 (s, 3H), 1.47 (t, *J* = 7.0 Hz, 3H); <sup>13</sup>C NMR (100 MHz, CDCl<sub>3</sub>): δ (ppm) 162.6, 156.7, 147.7 (x 2), 147.6, 139.7, 132.4 (q, *J*<sub>C-F</sub> = 32.6 Hz), 127.8, 125.7 (q, *J*<sub>C-F</sub> = 3.7 Hz), 123.8 (q, *J*<sub>C-F</sub> = 272.4 Hz), 106.3, 103.3, 60.2, 17.6, 14.4; HRMS (ESI): *m/z* [M + H]<sup>+</sup> calcd for C<sub>17</sub>H<sub>15</sub>F<sub>3</sub>N<sub>3</sub>O<sub>2</sub>: 350.1111; found: 350.1113.

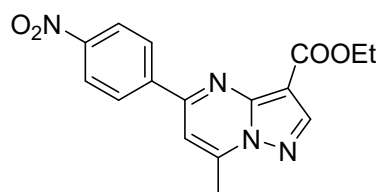

**ethyl 7-methyl-5-(4-nitrophenyl)pyrazolo[1,5-*a*]pyrimidine-3-carboxylate (3k):**

Yield 57% (92.9 mg; petroleum ether/EtOAc = 3:1); yellow solid; mp 168–170 °C; <sup>1</sup>H NMR (400 MHz, CDCl<sub>3</sub>): δ (ppm) 8.63 (s, 1H), 8.41–8.37 (m, 2H), 8.36–8.33 (m, 2H), 7.42 (s, 1H), 4.46 (q, *J* = 7.2 Hz, 2H), 2.94 (s, 3H), 1.47 (t, *J* = 7.0 Hz, 3H); <sup>13</sup>C NMR (100 MHz, CDCl<sub>3</sub>): δ (ppm) 162.5, 155.7, 149.0, 147.9(4), 147.8(6), 147.6, 142.2, 128.4, 124.0, 106.4, 103.6, 60.3, 17.7, 14.4; HRMS (ESI): *m/z* [M + Na]<sup>+</sup> calcd for C<sub>16</sub>H<sub>14</sub>N<sub>4</sub>NaO<sub>4</sub>: 349.0907; found: 349.0905.

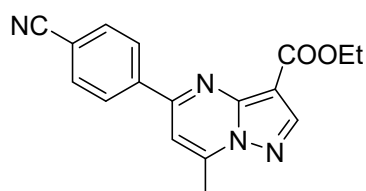

**ethyl 5-(4-cyanophenyl)-7-methylpyrazolo[1,5-*a*]pyrimidine-3-carboxylate (3l):**

Yield 80% (122.4 mg; petroleum ether/EtOAc = 8:1); light yellow solid; mp 180–182 °C; <sup>1</sup>H NMR (400 MHz, CDCl<sub>3</sub>): δ (ppm) 8.54 (s, 1H), 8.25 (d, *J* = 8.8 Hz, 2H), 7.73 (d, *J* = 8.8 Hz, 2H), 7.28 (s, 1H), 4.37 (q, *J* = 7.2 Hz, 2H), 2.84 (s, 3H), 1.38 (t, *J* = 7.2 Hz, 3H); <sup>13</sup>C NMR

(100 MHz, CDCl<sub>3</sub>):  $\delta$  (ppm) 162.5, 156.1, 147.8(5), 147.8(3), 147.7, 140.5, 132.6, 128.1, 118.3, 114.2, 106.3, 103.5, 60.3, 17.7, 14.4; HRMS (ESI):  $m/z$  [M + Na]<sup>+</sup> calcd for C<sub>17</sub>H<sub>14</sub>N<sub>4</sub>NaO<sub>2</sub>: 329.1009; found: 329.1012.

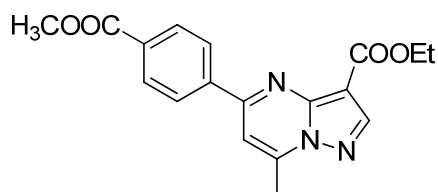

**ethyl 5-(4-(methoxycarbonyl)phenyl)-7-methylpyrazolo[1,5-*a*]pyrimidine-3-carboxylate (3m):**

Yield 70% (118.6 mg; petroleum ether/EtOAc = 5:1); yellow solid; mp 199–202 °C; <sup>1</sup>H NMR (400 MHz, CDCl<sub>3</sub>):  $\delta$  (ppm) 8.60 (s, 1H), 8.28 (d,  $J$  = 8.4 Hz, 2H), 8.16 (d,  $J$  = 8.4 Hz, 2H), 7.37 (s, 1H), 4.45 (q,  $J$  = 7.2 Hz, 2H), 3.97 (s, 3H), 2.90 (s, 3H), 1.47 (t,  $J$  = 7.0 Hz, 3H); <sup>13</sup>C NMR (100 MHz, CDCl<sub>3</sub>):  $\delta$  (ppm) 166.5, 162.7, 157.2, 147.8, 147.7, 147.5, 140.5, 132.0, 130.0, 127.5, 106.5, 103.3, 60.3, 52.3, 17.6, 14.4; HRMS (ESI):  $m/z$  [M + H]<sup>+</sup> calcd for C<sub>18</sub>H<sub>18</sub>N<sub>3</sub>O<sub>4</sub>: 340.1292; found: 340.1293.

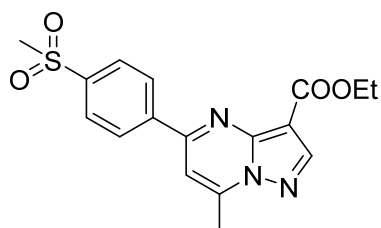

**ethyl 7-methyl-5-(4-(methylsulfonyl)phenyl)pyrazolo[1,5-*a*]pyrimidine-3-carboxylate (3n):**

Yield 68% (122 mg; petroleum ether/EtOAc = 3:1); yellow solid; mp 173–175 °C; <sup>1</sup>H NMR (400 MHz, CDCl<sub>3</sub>):  $\delta$  (ppm) 8.60 (s, 1H), 8.39 (d,  $J$  = 8.8 Hz, 2H), 8.06 (d,  $J$  = 8.8 Hz, 2H), 7.40 (s, 1H), 4.44 (q,  $J$  = 7.2 Hz, 2H), 3.12 (s, 3H), 2.92 (s, 3H), 1.46 (t,  $J$  = 7.0 Hz, 3H); <sup>13</sup>C NMR (100 MHz, CDCl<sub>3</sub>)  $\delta$  (ppm): 162.4, 156.1, 147.8, 147.7, 147.5, 141.9, 141.4, 128.4, 127.8, 106.4, 103.4, 60.2, 44.3, 17.6, 14.3; HRMS (ESI):  $m/z$  [M + Na]<sup>+</sup> calcd for C<sub>17</sub>H<sub>17</sub>N<sub>3</sub>NaO<sub>4</sub>S: 382.0832; found: 382.0829.

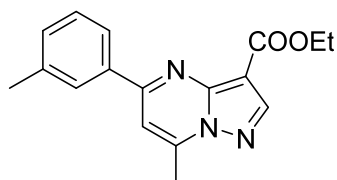

**ethyl 7-methyl-5-(*m*-tolyl)pyrazolo[1,5-*a*]pyrimidine-3-carboxylate (3o):**

Yield 79% (116.5 mg; petroleum ether/EtOAc = 8:1); yellow solid; mp 91–94 °C; <sup>1</sup>H NMR (400 MHz, CDCl<sub>3</sub>):  $\delta$  (ppm) 8.58 (s, 1H), 8.07 (s, 1H), 7.97 (d,  $J$  = 7.6 Hz, 1H), 7.39 (t,  $J$  = 7.6 Hz, 1H), 7.30–7.34 (m, 2H), 4.45 (q,  $J$  = 7.2 Hz, 2H), 2.87 (s, 3H), 2.46 (s, 3H), 1.47 (t,  $J$  = 7.2 Hz, 3H); <sup>13</sup>C NMR (100 MHz, CDCl<sub>3</sub>):  $\delta$  (ppm) 162.9, 158.8, 147.9, 147.4, 147.0, 138.6,

136.4, 131.8, 128.7, 128.2, 124.7, 106.4, 102.9, 60.1, 21.5, 17.6, 14.4; HRMS (ESI):  $m/z$  [ $M + Na$ ]<sup>+</sup> calcd for C<sub>17</sub>H<sub>17</sub>N<sub>3</sub>NaO<sub>2</sub>: 318.1213; found: 318.1211.

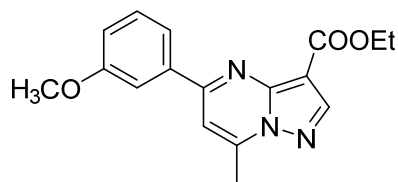

**ethyl 5-(3-methoxyphenyl)-7-methylpyrazolo[1,5-a]pyrimidine-3-carboxylate (3p) (CAS: 2137500-65-1):**

Yield 73% (113.5 mg; petroleum ether/EtOAc = 8:1); yellow solid; mp 100–102 °C; <sup>1</sup>H NMR (400 MHz, CDCl<sub>3</sub>):  $\delta$  (ppm) 8.59 (s, 1H), 7.84–7.82 (m, 1H), 7.75–7.70 (m, 1H), 7.41 (t,  $J$  = 8.0 Hz, 1H), 7.32 (s, 1H), 7.08–7.04 (m, 1H), 4.45 (q,  $J$  = 7.2 Hz, 2H), 3.92 (s, 3H), 2.88 (s, 3H), 1.47 (t,  $J$  = 7.0 Hz, 3H); <sup>13</sup>C NMR (100 MHz, CDCl<sub>3</sub>):  $\delta$  (ppm) 162.9, 160.1, 158.3, 147.7, 147.6, 147.1, 137.9, 129.8, 120.0, 117.3, 112.3, 106.5, 103.0, 60.2, 55.4, 17.6, 14.5; HRMS (ESI):  $m/z$  [ $M + H$ ]<sup>+</sup> calcd for C<sub>17</sub>H<sub>18</sub>N<sub>3</sub>O<sub>3</sub>: 312.1343; found: 312.1342.

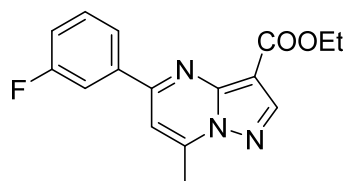

**ethyl 5-(3-fluorophenyl)-7-methylpyrazolo[1,5-a]pyrimidine-3-carboxylate (3q) (CAS: 2137500-67-3):**

Yield 72% (107.6 mg; petroleum ether/EtOAc = 10:1); light yellow solid; mp 107–110 °C; <sup>1</sup>H NMR (400 MHz, CDCl<sub>3</sub>):  $\delta$  (ppm) 8.60 (s, 1H), 7.98–7.96 (m, 1H), 7.96–7.93 (m, 1H), 7.52–7.45 (m, 1H), 7.31 (s, 1H), 7.24–7.18 (m, 1H), 4.45 (q,  $J$  = 7.2 Hz, 2H), 2.90 (s, 3H), 1.47 (t,  $J$  = 7.2 Hz, 3H); <sup>13</sup>C NMR (100 MHz, CDCl<sub>3</sub>):  $\delta$  (ppm) 163.2 (d,  $J_{C-F}$  = 246.6 Hz), 162.8, 157.2 (d,  $J_{C-F}$  = 2.7 Hz), 147.7(3), 147.7(0), 147.4, 138.8 (d,  $J_{C-F}$  = 7.6 Hz), 130.5 (d,  $J_{C-F}$  = 8.1 Hz), 123.2 (d,  $J_{C-F}$  = 2.9 Hz), 117.0 (d,  $J_{C-F}$  = 21.4 Hz), 114.6 (d,  $J_{C-F}$  = 23.2 Hz), 106.3, 103.2, 60.3, 17.7, 14.5; HRMS (ESI):  $m/z$  [ $M + H$ ]<sup>+</sup> calcd for C<sub>16</sub>H<sub>15</sub>FN<sub>3</sub>O<sub>2</sub>: 300.1143; found: 300.1142.

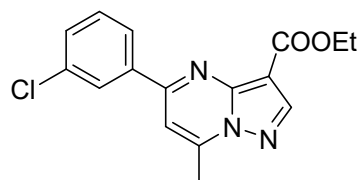

**ethyl 5-(3-chlorophenyl)-7-methylpyrazolo[1,5-a]pyrimidine-3-carboxylate (3r) (CAS: 2137500-77-5):**

Yield 71% (112 mg; petroleum ether/EtOAc = 10:1); yellow solid; mp 108–111 °C; <sup>1</sup>H NMR (400 MHz, CDCl<sub>3</sub>):  $\delta$  (ppm) 8.60 (s, 1H), 8.21 (t,  $J$  = 1.6 Hz, 1H), 8.08 (dt,  $J$  = 7.2, 1.6 Hz, 1H), 7.50–7.47 (m, 1H), 7.47–7.42 (m, 1H), 7.31 (s, 1H), 4.45 (q,  $J$  = 7.2 Hz, 2H), 2.90 (s, 3H), 1.48 (t,  $J$  = 7.0 Hz, 3H); <sup>13</sup>C NMR (100 MHz, CDCl<sub>3</sub>):  $\delta$  (ppm) 162.8, 157.0, 147.7(4),

147.6(9), 147.5, 138.3, 135.1, 130.9, 130.1, 127.7, 125.7, 106.2, 103.3, 60.3, 17.7, 14.4; HRMS (ESI):  $m/z$   $[M + H]^+$  calcd for  $C_{16}H_{15}ClN_3O_2$ : 316.0847; found: 316.0850.

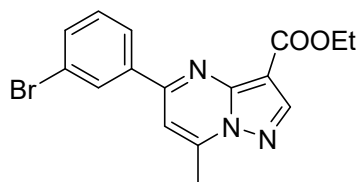

**ethyl 5-(3-bromophenyl)-7-methylpyrazolo[1,5-a]pyrimidine-3-carboxylate (3s) (CAS: 2137501-07-4):**

Yield 75% (135 mg; petroleum ether/EtOAc = 10:1); orange solid; mp 120–123 °C;  $^1H$  NMR (400 MHz,  $CDCl_3$ ):  $\delta$  (ppm) 8.59 (s, 1H), 8.37–8.33 (m, 1H), 8.13–8.09 (m, 1H), 7.64–7.60 (m, 1H), 7.37 (t,  $J = 8.0$  Hz, 1H), 7.29 (s, 1H), 4.45 (q,  $J = 7.2$  Hz, 2H), 2.89 (s, 3H), 1.48 (t,  $J = 7.0$  Hz, 3H);  $^{13}C$  NMR (100 MHz,  $CDCl_3$ ):  $\delta$  (ppm) 162.7, 156.8, 147.6(6), 147.6(5), 147.4, 138.5, 133.8, 130.5, 130.3, 126.1, 123.2, 106.1, 103.2, 60.3, 17.6, 14.4; HRMS (ESI):  $m/z$   $[M + Na]^+$  calcd for  $C_{16}H_{14}BrN_3NaO_2$ : 382.0162; found: 382.0161.

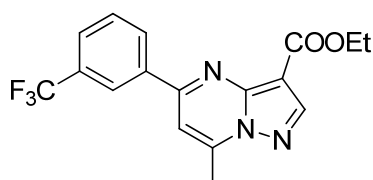

**ethyl 7-methyl-5-(3-(trifluoromethyl)phenyl)pyrazolo[1,5-a]pyrimidine-3-carboxylate (3t):**

Yield 74% (129 mg; petroleum ether/EtOAc = 10:1); yellow solid; mp 124–126 °C;  $^1H$  NMR (400 MHz,  $CDCl_3$ ):  $\delta$  (ppm) 8.60 (s, 1H), 8.47 (s, 1H), 8.38 (d,  $J = 8.0$  Hz, 1H), 7.75 (d,  $J = 7.6$  Hz, 1H), 7.63 (t,  $J = 7.8$  Hz, 1H), 7.35 (s, 1H), 4.45 (q,  $J = 7.2$  Hz, 2H), 2.90 (s, 3H), 1.48 (t,  $J = 7.2$  Hz, 3H);  $^{13}C$  NMR (100 MHz,  $CDCl_3$ ):  $\delta$  (ppm) 162.7, 156.6, 147.7, 147.6 (d,  $J_{C-F} = 13.3$  Hz), 137.2, 131.3 (q,  $J_{C-F} = 32.6$  Hz), 130.6, 129.4, 127.3 (q,  $J_{C-F} = 3.6$  Hz), 123.8 (q,  $J_{C-F} = 272.5$  Hz), 124.3 (q,  $J_{C-F} = 3.9$  Hz), 105.9, 103.3, 60.3, 17.6, 14.3; HRMS (ESI):  $m/z$   $[M + H]^+$  calcd for  $C_{17}H_{15}F_3N_3O_2$ : 350.1111; found: 350.1112.

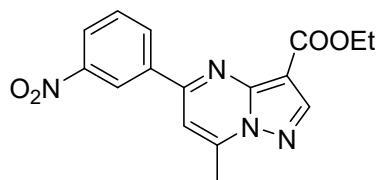

**ethyl 7-methyl-5-(3-nitrophenyl)pyrazolo[1,5-a]pyrimidine-3-carboxylate (3u):**

Yield 63% (102.7 mg; petroleum ether/EtOAc = 5:1); white solid; mp 212–214 °C;  $^1H$  NMR (400 MHz,  $CDCl_3$ ):  $\delta$  (ppm) 9.01 (s, 1H), 8.69–8.60 (m, 2H), 8.40–8.34 (m, 1H), 7.73 (t,  $J = 8.0$  Hz, 1H), 7.43 (s, 1H), 4.46 (q,  $J = 7.2$  Hz, 2H), 2.95 (s, 3H), 1.50 (t,  $J = 7.2$  Hz, 3H);  $^{13}C$  NMR (100 MHz,  $CDCl_3$ ):  $\delta$  (ppm) 162.7, 155.7, 148.7, 148.1, 148.0, 147.6, 138.3, 133.4, 130.1, 125.3, 122.3, 106.0, 103.6, 60.4, 17.7, 14.4; HRMS (ESI):  $m/z$   $[M + Na]^+$  calcd for  $C_{16}H_{14}N_4NaO_4$ : 349.0907; found: 349.0907.

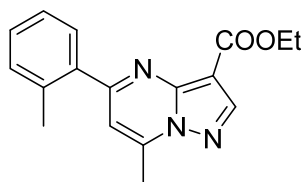

**ethyl 7-methyl-5-(*o*-tolyl)pyrazolo[1,5-*a*]pyrimidine-3-carboxylate (3v):**

Yield 75% (110.6 mg; petroleum ether/EtOAc = 8:1); yellow solid; mp 112–115 °C; <sup>1</sup>H NMR (400 MHz, CDCl<sub>3</sub>): δ (ppm) 8.62 (s, 1H), 7.56 (d, *J* = 7.6 Hz, 1H), 7.39–7.29 (m, 3H), 7.07 (s, 1H), 4.42 (q, *J* = 7.2 Hz, 2H), 2.88 (s, 3H), 2.60 (s, 3H), 1.42 (t, *J* = 7.2 Hz, 3H); <sup>13</sup>C NMR (100 MHz, CDCl<sub>3</sub>): δ (ppm) 162.9, 161.9, 147.5, 147.3, 146.6, 137.6, 137.1, 131.5, 129.9, 129.7, 126.0, 110.2, 103.1, 60.2, 20.9, 17.5, 14.5; HRMS (ESI): *m/z* [M + Na]<sup>+</sup> calcd for C<sub>17</sub>H<sub>17</sub>N<sub>3</sub>NaO<sub>2</sub>: 318.1213; found: 318.1210.

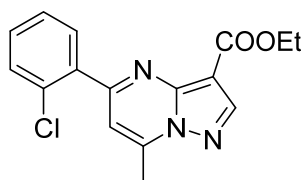

**ethyl 5-(2-chlorophenyl)-7-methylpyrazolo[1,5-*a*]pyrimidine-3-carboxylate (3w):**

Yield 67% (105.7 mg; petroleum ether/EtOAc = 8:1); light yellow solid; mp 182–184 °C; <sup>1</sup>H NMR (400 MHz, CDCl<sub>3</sub>): δ (ppm) 8.62 (s, 1H), 7.87–7.82 (m, 1H), 7.52–7.47 (m, 1H), 7.44–7.39 (m, 2H), 7.34 (s, 1H), 4.42 (q, *J* = 7.2 Hz, 2H), 2.90 (s, 3H), 1.42 (t, *J* = 7.2 Hz, 3H); <sup>13</sup>C NMR (100 MHz, CDCl<sub>3</sub>): δ (ppm) 162.6, 158.9, 147.8, 147.4, 146.2, 137.1, 132.2(3), 132.1(5), 130.9, 130.3, 127.3, 111.0, 103.4, 60.2, 17.6, 14.5; HRMS (ESI): *m/z* [M + Na]<sup>+</sup> calcd for C<sub>16</sub>H<sub>14</sub>ClN<sub>3</sub>NaO<sub>2</sub>: 338.0667; found: 338.0665.

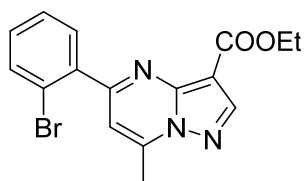

**ethyl 5-(2-bromophenyl)-7-methylpyrazolo[1,5-*a*]pyrimidine-3-carboxylate (3x):**

Yield 68% (122.4 mg; petroleum ether/EtOAc = 8:1); white solid; mp 177–179 °C; <sup>1</sup>H NMR (400 MHz, CDCl<sub>3</sub>): δ (ppm) 8.62 (s, 1H), 7.77–7.73 (m, 1H), 7.70–7.66 (m, 1H), 7.47–7.41 (m, 1H), 7.35–7.29 (m, 2H), 4.42 (q, *J* = 7.2 Hz, 2H), 2.89 (s, 3H), 1.41 (t, *J* = 7.0 Hz, 3H); <sup>13</sup>C NMR (100 MHz, CDCl<sub>3</sub>): δ (ppm) 162.5, 160.1, 147.7, 147.3, 146.1, 139.0, 133.4, 132.0, 130.9, 127.7, 121.4, 111.0, 103.4, 60.2, 17.5, 14.4; HRMS (ESI): *m/z* [M + Na]<sup>+</sup> calcd for C<sub>16</sub>H<sub>14</sub>BrN<sub>3</sub>NaO<sub>2</sub>: 382.0162; found: 382.0162.

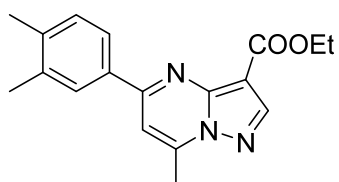

**ethyl 5-(3,4-dimethylphenyl)-7-methylpyrazolo[1,5-*a*]pyrimidine-3-carboxylate (3y):**

Yield 80% (123.6 mg; petroleum ether/EtOAc = 5:1); yellow solid; mp 98–101 °C; <sup>1</sup>H NMR (400 MHz, CDCl<sub>3</sub>): δ (ppm) 8.48 (s, 1H), 7.96 (s, 1H), 7.84 (d, *J* = 7.6 Hz, 1H), 7.24 (s, 1H), 7.18 (d, *J* = 8.4 Hz, 1H), 4.37 (q, *J* = 7.2 Hz, 2H), 2.78 (s, 3H), 2.29 (s, 3H), 2.26 (s, 3H), 1.40 (t, *J* = 7.2 Hz, 3H); <sup>13</sup>C NMR (100 MHz, CDCl<sub>3</sub>): δ (ppm) 163.0, 158.8, 148.0, 147.4, 146.8, 140.3, 137.3, 134.0, 130.2, 128.7, 125.0, 106.2, 102.7, 60.1, 19.9, 19.8, 17.6, 14.5; HRMS (ESI): *m/z* [M + Na]<sup>+</sup> calcd for C<sub>18</sub>H<sub>19</sub>N<sub>3</sub>NaO<sub>2</sub>: 332.1369; found: 332.1367.

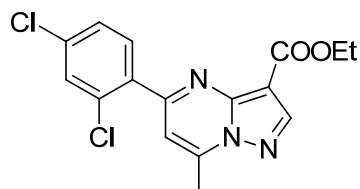

**ethyl 5-(2,4-dichlorophenyl)-7-methylpyrazolo[1,5-*a*]pyrimidine-3-carboxylate (3z):**

Yield 76% (133 mg; petroleum ether/EtOAc = 10:1); yellow solid; mp 195–197 °C; <sup>1</sup>H NMR (400 MHz, CDCl<sub>3</sub>): δ (ppm) 8.62 (s, 1H), 7.81 (d, *J* = 8.4 Hz, 1H), 7.55–7.46 (m, 1H), 7.40 (dd, *J* = 8.4, 2.0 Hz, 1H), 7.32 (s, 1H), 4.42 (q, *J* = 7.2 Hz, 2H), 2.89 (s, 3H), 1.42 (t, *J* = 7.2 Hz, 3H); <sup>13</sup>C NMR (100 MHz, CDCl<sub>3</sub>): δ (ppm) 162.5, 157.7, 147.7, 147.4, 146.4, 136.4, 135.5, 133.0, 132.9, 130.0, 127.7, 110.6, 103.4, 60.2, 17.5, 14.4; HRMS (ESI): *m/z* [M + H]<sup>+</sup> calcd for C<sub>16</sub>H<sub>14</sub>Cl<sub>2</sub>N<sub>3</sub>O<sub>2</sub>: 350.0458; found: 350.0456.

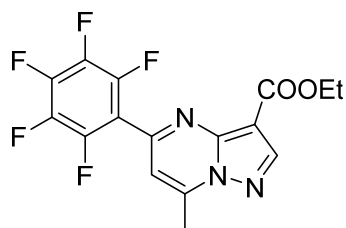

**ethyl 7-methyl-5-(perfluorophenyl)pyrazolo[1,5-*a*]pyrimidine-3-carboxylate (3aa):**

Yield 70% (129.8 mg; petroleum ether/EtOAc = 12:1); yellow solid; mp 147–149 °C; <sup>1</sup>H NMR (400 MHz, CDCl<sub>3</sub>): δ (ppm) 8.67 (s, 1H), 7.06 (s, 1H), 4.42 (q, *J* = 7.2 Hz, 2H), 2.93 (s, 3H), 1.42 (t, *J* = 7.2 Hz, 3H); <sup>13</sup>C NMR (100 MHz, CDCl<sub>3</sub>): δ (ppm) 162.2, 148.9, 147.8, 147.4, 144.9 (dm, *J*<sub>C-F</sub> = 253.2 Hz), 142.0 (dm, *J*<sub>C-F</sub> = 257.4 Hz), 137.9 (dm, *J*<sub>C-F</sub> = 249.7 Hz), 113.8–113.4 (m), 110.8, 104.1, 60.4, 17.6, 14.4; HRMS (ESI): *m/z* [M + Na]<sup>+</sup> calcd for C<sub>16</sub>H<sub>10</sub>F<sub>5</sub>N<sub>3</sub>NaO<sub>2</sub>: 394.0585; found: 394.0584.

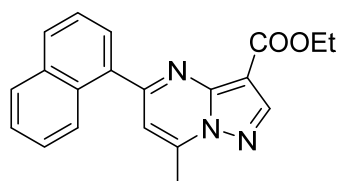

**ethyl 7-methyl-5-(naphthalen-1-yl)pyrazolo[1,5-*a*]pyrimidine-3-carboxylate (3ab):**

Yield 78% (129 mg; petroleum ether/EtOAc = 5:1); yellow solid; mp 113–115 °C; <sup>1</sup>H NMR (400 MHz, CDCl<sub>3</sub>): δ (ppm) 8.66 (s, 1H), 8.55–8.50 (m, 1H), 7.98 (d, *J* = 8.4 Hz, 1H), 7.95–7.91 (m, 1H), 7.82 (dd, *J* = 7.2, 1.2 Hz, 1H), 7.60–7.53 (m, 3H), 7.24 (s, 1H), 4.42 (q, *J*

= 7.2 Hz, 2H), 2.91 (s, 3H), 1.41 (t,  $J = 7.2$  Hz, 3H);  $^{13}\text{C}$  NMR (100 MHz,  $\text{CDCl}_3$ ):  $\delta$  (ppm) 162.9, 161.1, 147.6(1), 147.5(8), 146.7, 135.7, 134.0, 130.7, 130.6, 128.7, 128.5, 127.1, 126.2, 125.4, 125.1, 111.1, 103.4, 60.2, 17.5, 14.5; HRMS (ESI):  $m/z$   $[\text{M} + \text{Na}]^+$  calcd for  $\text{C}_{20}\text{H}_{17}\text{N}_3\text{NaO}_2$ : 354.1213; found: 354.1217.

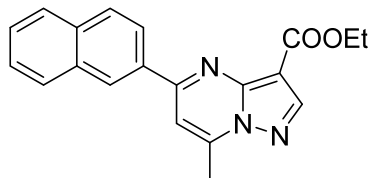

**ethyl 7-methyl-5-(naphthalen-2-yl)pyrazolo[1,5-*a*]pyrimidine-3-carboxylate (3ac):**

Yield 80% (132.4 mg; petroleum ether/EtOAc = 8:1); yellow solid; mp 145–147 °C;  $^1\text{H}$  NMR (400 MHz,  $\text{CDCl}_3$ ):  $\delta$  (ppm) 8.64 (s, 1H), 8.58 (s, 1H), 8.37 (dd,  $J = 8.8, 2.0$  Hz, 1H), 7.99–7.92 (m, 2H), 7.90–7.85 (m, 1H), 7.58–7.51 (m, 2H), 7.45 (s, 1H), 4.47 (q,  $J = 7.2$  Hz, 2H), 2.88 (s, 3H), 1.50 (t,  $J = 7.2$  Hz, 3H);  $^{13}\text{C}$  NMR (100 MHz,  $\text{CDCl}_3$ ):  $\delta$  (ppm) 162.9, 158.4, 148.0, 147.5, 147.0, 134.5, 133.8, 133.1, 129.0, 128.7, 127.9, 127.7, 127.5, 126.6, 124.3, 106.4, 103.0, 60.2, 17.6, 14.5; HRMS (ESI):  $m/z$   $[\text{M} + \text{Na}]^+$  calcd for  $\text{C}_{20}\text{H}_{17}\text{N}_3\text{NaO}_2$ : 354.1213; found: 354.1216.

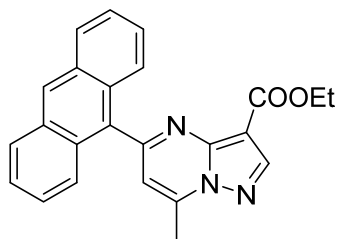

**ethyl 5-(anthracen-9-yl)-7-methylpyrazolo[1,5-*a*]pyrimidine-3-carboxylate (3ad):**

Yield 69% (131.4 mg; petroleum ether/EtOAc = 8:1); orange solid; mp 250–252 °C;  $^1\text{H}$  NMR (400 MHz,  $\text{CDCl}_3$ ):  $\delta$  (ppm) 8.71 (s, 1H), 8.58 (s, 1H), 8.06 (d,  $J = 8.4$  Hz, 2H), 7.77–7.72 (m, 2H), 7.50–7.45 (m, 2H), 7.42–7.38 (m, 2H), 7.10 (s, 1H), 4.36 (q,  $J = 7.2$  Hz, 2H), 2.93 (s, 3H), 1.33 (t,  $J = 7.2$  Hz, 3H);  $^{13}\text{C}$  NMR (100 MHz,  $\text{CDCl}_3$ ):  $\delta$  (ppm) 162.5, 161.1, 148.1, 147.5, 146.6, 132.6, 131.2, 129.6, 128.7, 128.6, 126.4, 125.5, 125.3, 113.4, 103.6, 60.1, 17.5, 14.4; HRMS (ESI):  $m/z$   $[\text{M} + \text{Na}]^+$  calcd for  $\text{C}_{24}\text{H}_{19}\text{N}_3\text{NaO}_2$ : 404.1369; found: 404.1366.

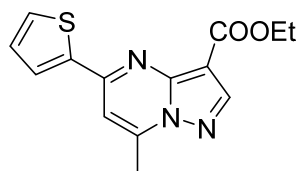

**ethyl 7-methyl-5-(thiophen-2-yl)pyrazolo[1,5-*a*]pyrimidine-3-carboxylate (3ae):**

Yield 61% (87.5 mg; petroleum ether/EtOAc = 5:1); brown solid; mp 142–144 °C;  $^1\text{H}$  NMR (400 MHz,  $\text{CDCl}_3$ ):  $\delta$  (ppm) 8.53 (s, 1H), 7.75–7.72 (m, 1H), 7.57–7.54 (m, 1H), 7.16–7.10 (m, 2H), 4.43 (q,  $J = 7.2$  Hz, 2H), 2.82 (s, 3H), 1.48 (t,  $J = 7.2$  Hz, 3H);  $^{13}\text{C}$  NMR (100 MHz,  $\text{CDCl}_3$ ):  $\delta$  (ppm) 162.8, 153.7, 147.4, 147.3, 146.9, 142.5, 131.0, 128.3, 128.1, 105.2, 102.6,

60.1, 17.4, 14.3; HRMS (ESI):  $m/z$   $[M + H]^+$  calcd for  $C_{14}H_{14}N_3O_2S$ : 288.0801; found: 288.0803.

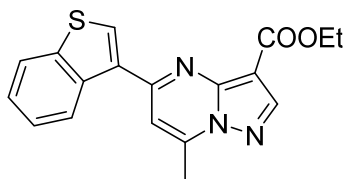

**ethyl 5-(benzo[b]thiophen-3-yl)-7-methylpyrazolo[1,5-a]pyrimidine-3-carboxylate (3af):**

Yield 62% (104.5 mg; petroleum ether/EtOAc = 5:1); orange solid; mp 179–181 °C;  $^1H$  NMR (400 MHz,  $CDCl_3$ ):  $\delta$  (ppm) 9.37 (d,  $J$  = 8.4 Hz, 1H), 8.62 (s, 1H), 8.11 (s, 1H), 7.91 (d,  $J$  = 8.0 Hz, 1H), 7.58–7.53 (m, 1H), 7.48–7.44 (m, 1H), 7.27 (s, 1H), 4.49 (q,  $J$  = 7.2 Hz, 2H), 2.86 (s, 3H), 1.55 (t,  $J$  = 7.0 Hz, 3H);  $^{13}C$  NMR (100 MHz,  $CDCl_3$ ):  $\delta$  (ppm) 163.2, 155.4, 147.7, 147.2, 146.7, 140.7, 136.8, 133.5, 130.4, 126.1, 125.5, 125.2, 122.5, 107.5, 103.4, 60.4, 17.5, 14.6; HRMS (ESI):  $m/z$   $[M + Na]^+$  calcd for  $C_{18}H_{15}N_3NaO_2S$ : 360.0777; found: 360.0779.

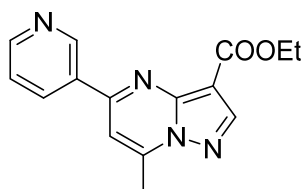

**ethyl 7-methyl-5-(pyridin-3-yl)pyrazolo[1,5-a]pyrimidine-3-carboxylate (3ag) (CAS: 2137500-39-9):**

Yield 55% (77.5 mg; petroleum ether/EtOAc = 2:1); brown solid; mp 186–188 °C;  $^1H$  NMR (400 MHz,  $CDCl_3$ ):  $\delta$  (ppm) 9.36 (s, 1H), 8.75 (dd,  $J$  = 4.8, 1.6 Hz, 1H), 8.65–8.56 (m, 2H), 7.51–7.46 (m, 1H), 7.37 (s, 1H), 4.45 (q,  $J$  = 7.2 Hz, 2H), 2.93 (s, 3H), 1.47 (t,  $J$  = 7.0 Hz, 3H);  $^{13}C$  NMR (100 MHz,  $CDCl_3$ ):  $\delta$  (ppm) 162.7, 156.1, 151.7, 148.6, 147.9, 147.8, 135.3, 132.4, 123.8, 106.0, 103.4, 60.3, 17.7, 14.5; HRMS (ESI):  $m/z$   $[M + H]^+$  calcd for  $C_{15}H_{15}N_4O_2$ : 283.1190; found: 283.1187.

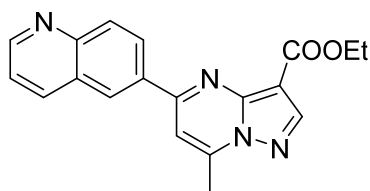

**ethyl 7-methyl-5-(quinolin-6-yl)pyrazolo[1,5-a]pyrimidine-3-carboxylate (3ah):**

Yield 65% (107.9 mg; petroleum ether/EtOAc = 2:1); white solid; mp 164–167 °C;  $^1H$  NMR (400 MHz,  $CDCl_3$ ):  $\delta$  (ppm) 9.00 (dd,  $J$  = 4.4, 1.6 Hz, 1H), 8.74 (d,  $J$  = 2.0 Hz, 1H), 8.62 (s, 1H), 8.58 (dd,  $J$  = 8.8, 2.0 Hz, 1H), 8.34–8.30 (m, 1H), 8.25 (d,  $J$  = 8.8 Hz, 1H), 7.52–7.47 (m, 2H), 4.48 (q,  $J$  = 7.2 Hz, 2H), 2.95 (s, 3H), 1.50 (t,  $J$  = 7.2 Hz, 3H);  $^{13}C$  NMR (100 MHz,  $CDCl_3$ ):  $\delta$  (ppm) 162.8, 157.7, 151.8, 149.3, 148.0, 147.7, 147.4, 137.1, 134.6, 130.3, 128.1, 128.0, 127.9, 121.9, 106.5, 103.3, 60.3, 17.8, 14.6; HRMS (ESI):  $m/z$   $[M + H]^+$  calcd for  $C_{19}H_{17}N_4O_2$ : 333.1346; found: 333.1341.



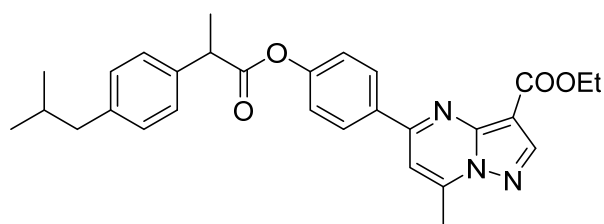

**ethyl 5-(4-((2-(4-isobutylphenyl)propanoyl)oxy)phenyl)-7-methylpyrazolo[1,5-a]pyrimidine-3-carboxylate (3ai):**

Yield 61% (148 mg; petroleum ether/EtOAc = 8:1); yellow solid; mp 42–45 °C; <sup>1</sup>H NMR (400 MHz, CDCl<sub>3</sub>): δ (ppm) 8.58 (s, 1H), 8.21 (d, *J* = 8.8 Hz, 2H), 7.32 (d, *J* = 8.0 Hz, 2H), 7.29 (s, 1H), 7.17 (d, *J* = 8.8 Hz, 4H), 4.44 (q, *J* = 7.2 Hz, 2H), 3.97 (q, *J* = 7.2 Hz, 1H), 2.88 (s, 3H), 2.50–2.46 (m, 2H), 1.93–1.83 (m, 1H), 1.63 (d, *J* = 7.2 Hz, 3H), 1.45 (t, *J* = 7.2 Hz, 3H), 0.93 (s, 3H), 0.91 (s, 3H); <sup>13</sup>C NMR (100 MHz, CDCl<sub>3</sub>): δ (ppm) 172.9, 162.9, 157.7, 153.2, 147.6, 147.2, 141.0, 137.0, 134.1, 131.7, 129.6, 128.8, 127.2, 122.0, 121.6, 106.2, 103.1, 60.2, 45.3, 45.0, 30.2, 22.4, 18.5, 17.7, 14.5; HRMS (ESI): *m/z* [M + H]<sup>+</sup> calcd for C<sub>29</sub>H<sub>32</sub>N<sub>3</sub>O<sub>4</sub>: 486.2387; found: 486.2387.

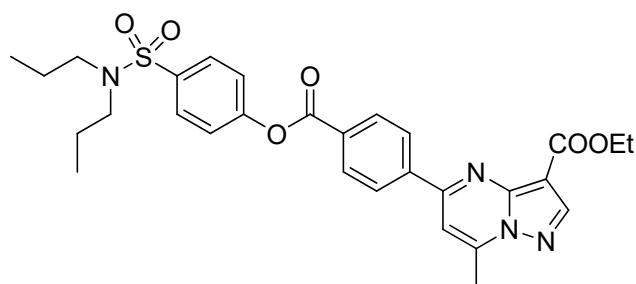

**ethyl 5-(4-((4-(*N,N*-dipropylsulfamoyl)phenoxy)carbonyl)phenyl)-7-methylpyrazolo[1,5-a]pyrimidine-3-carboxylate (3aj):**

Yield 50% (141 mg; petroleum ether/EtOAc = 10:1); white solid; mp 128–130 °C; <sup>1</sup>H NMR (400 MHz, CDCl<sub>3</sub>): δ (ppm) 8.60 (s, 1H), 8.39–8.30 (m, 4H), 8.01–7.95 (m, 2H), 7.44–7.38 (m, 2H), 7.35 (s, 1H), 4.45 (q, *J* = 7.2 Hz, 2H), 3.17–3.11 (m, 4H), 2.91 (s, 3H), 1.62–1.54 (m, 4H), 1.47 (t, *J* = 7.2 Hz, 3H), 0.90 (t, *J* = 7.2 Hz, 6H); <sup>13</sup>C NMR (100 MHz, CDCl<sub>3</sub>): δ (ppm) 163.5, 162.8, 157.5, 152.8, 148.0, 147.6, 147.3, 145.1, 134.7, 132.5, 130.9, 129.1, 127.2, 122.1, 106.2, 103.1, 60.2, 49.9, 21.9, 17.7, 14.5, 11.2; HRMS (ESI): *m/z* [M + H]<sup>+</sup> calcd for C<sub>29</sub>H<sub>33</sub>N<sub>4</sub>O<sub>6</sub>S: 565.2115; found: 565.2119.

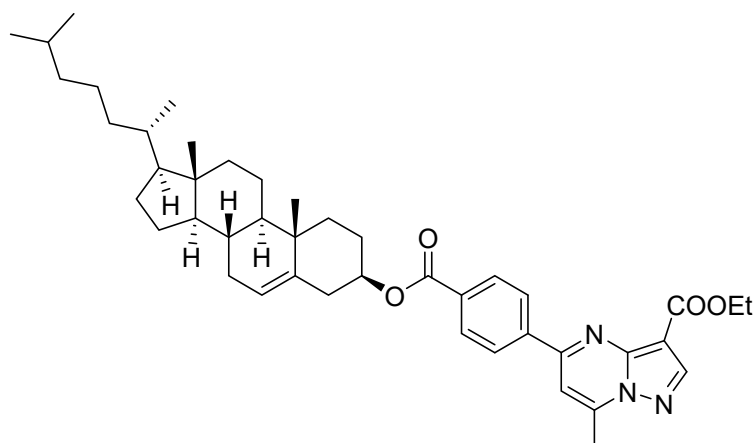

**ethyl 5-(4-((((3R,8R,9R,10S,13S,14R,17S)-10,13-dimethyl-17-((S)-6-methylheptan-2-yl)-2,3,4,7,8,9,10,11,12,13,14,15,16,17-tetradecahydro-1H-cyclopenta[a]phenanthren-3-yl)oxy)carbonyl)phenyl)-7-methylpyrazolo[1,5-a]pyrimidine-3-carboxylate (3ak):**

Yield 80% (277.2 mg; petroleum ether/EtOAc = 8:1); yellow solid; mp 109–112 °C; <sup>1</sup>H NMR (400 MHz, CDCl<sub>3</sub>): δ (ppm) 8.60 (s, 1H), 8.28 (d, *J* = 8.4 Hz, 2H), 8.16 (d, *J* = 8.4 Hz, 2H), 7.38 (s, 1H), 5.43 (d, *J* = 4.0 Hz, 1H), 4.94–4.85 (m, 1H), 4.45 (q, *J* = 7.2 Hz, 2H), 2.91 (s, 3H), 2.50 (d, *J* = 7.6 Hz, 2H), 2.06–1.94 (m, 4H), 1.85–1.74 (m, 2H), 1.57–1.50 (m, 3H), 1.47 (t, *J* = 7.0 Hz, 5H), 1.42–1.30 (m, 4H), 1.26–1.21 (m, 2H), 1.20–1.13 (m, 3H), 1.11–1.06 (m, 5H), 1.03–0.96 (m, 3H), 0.93 (d, *J* = 6.8 Hz, 3H), 0.87 (dd, *J* = 6.4, 1.6 Hz, 7H), 0.69 (s, 3H); <sup>13</sup>C NMR (100 MHz, CDCl<sub>3</sub>): δ (ppm) 165.4, 162.7, 157.3, 147.8, 147.7, 147.4, 140.3, 139.5, 132.8, 130.0, 127.5, 122.8, 106.5, 103.4, 75.0, 60.3, 56.6, 56.1, 50.0, 42.3, 39.7, 39.5, 38.2, 37.0, 36.6, 36.1, 35.8, 31.9, 31.8, 28.2, 28.0, 27.8, 24.3, 23.8, 22.8, 22.5, 21.0, 19.4, 18.7, 17.7, 14.5, 11.8; HRMS (ESI): *m/z* [M + H]<sup>+</sup> calcd for C<sub>44</sub>H<sub>60</sub>N<sub>3</sub>O<sub>4</sub>: 694.4578; found: 694.4572.

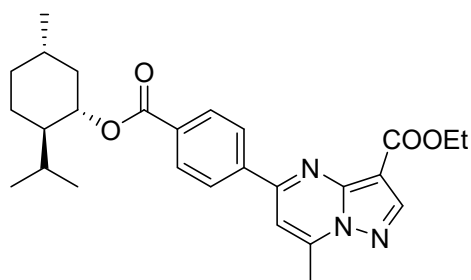

**ethyl 5-(4-((((1S,2R,5S)-2-isopropyl-5-methylcyclohexyl)oxy)carbonyl)phenyl)-7-methylpyrazolo[1,5-a]pyrimidine-3-carboxylate (3al):**

Yield 75% (173.6 mg; petroleum ether/EtOAc = 8:1); orange solid; mp 147–149 °C; <sup>1</sup>H NMR (400 MHz, CDCl<sub>3</sub>): δ (ppm) 8.60 (s, 1H), 8.29 (d, *J* = 8.4 Hz, 2H), 8.17 (d, *J* = 8.0 Hz, 2H), 7.38 (s, 1H), 5.02–4.93 (m, 1H), 4.45 (q, *J* = 7.2 Hz, 2H), 2.91 (s, 3H), 2.19–2.13 (m, 1H), 2.02–1.94 (m, 1H), 1.79–1.72 (m, 2H), 1.65–1.55 (m, 2H), 1.47 (t, *J* = 7.2 Hz, 3H), 1.21–1.09 (m, 2H), 0.95 (dd, *J* = 6.4, 2.0 Hz, 7H), 0.82 (d, *J* = 7.2 Hz, 3H); <sup>13</sup>C NMR (100 MHz, CDCl<sub>3</sub>): δ (ppm) 165.5, 162.7, 157.3, 147.8, 147.7, 147.4, 140.3, 132.7, 130.0, 127.5, 106.4, 103.4, 75.2, 60.2, 47.2, 40.9, 34.2, 31.4, 26.5, 23.6, 22.0, 20.7, 17.6, 16.5, 14.5; HRMS (ESI): *m/z* [M + H]<sup>+</sup> calcd for C<sub>27</sub>H<sub>34</sub>N<sub>3</sub>O<sub>4</sub>: 464.2544; found: 464.2545.

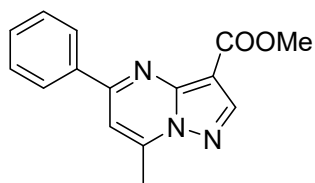

**methyl 7-methyl-5-phenylpyrazolo[1,5-a]pyrimidine-3-carboxylate (3am):**

Yield 72% (96 mg; petroleum ether/EtOAc = 10:1); white solid; mp 135–137 °C; <sup>1</sup>H NMR (400 MHz, CDCl<sub>3</sub>): δ (ppm) 8.57 (s, 1H), 8.20–8.13 (m, 2H), 7.52–7.44 (m, 3H), 7.28 (s, 1H), 3.97 (s, 3H), 2.83 (s, 3H); <sup>13</sup>C NMR (100 MHz, CDCl<sub>3</sub>): δ (ppm) 163.2, 158.6, 147.7, 147.5, 147.1, 136.3, 130.8, 128.8, 127.5, 106.3, 102.5, 51.4, 17.5; HRMS (ESI): m/z [M + Na]<sup>+</sup> calcd for C<sub>15</sub>H<sub>13</sub>N<sub>3</sub>NaO<sub>2</sub>: 290.0900; found: 290.0904.

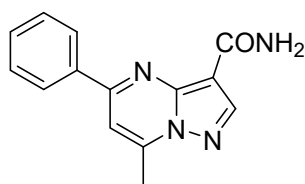

**7-methyl-5-phenylpyrazolo[1,5-a]pyrimidine-3-carboxamide (3an):**

Yield 60% (75.6 mg; petroleum ether/EtOAc = 2:1); light yellow solid; mp 225–227 °C; <sup>1</sup>H NMR (400 MHz, CDCl<sub>3</sub>): δ (ppm) 8.70 (s, 1H), 8.13–8.06 (m, 3H), 7.58–7.54 (m, 3H), 7.32 (s, 1H), 5.81 (s, 1H), 2.92 (s, 3H); <sup>13</sup>C NMR (100 MHz, CDCl<sub>3</sub>): δ (ppm) 164.2, 157.9, 147.8, 146.8, 146.5, 136.3, 131.2, 129.1, 127.5, 106.2, 105.3, 17.6; HRMS (ESI): m/z [M + Na]<sup>+</sup> calcd for C<sub>14</sub>H<sub>12</sub>N<sub>4</sub>NaO: 275.0903; found: 275.0900.

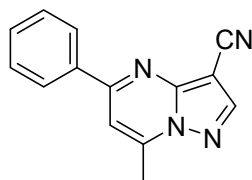

**7-methyl-5-phenylpyrazolo[1,5-a]pyrimidine-3-carbonitrile (3ao) (CAS: 140706-37-2):**

Yield 79% (92.4 mg; petroleum ether/EtOAc = 12:1); light yellow solid; mp 157–160 °C; <sup>1</sup>H NMR (400 MHz, CDCl<sub>3</sub>): δ (ppm) 8.34 (s, 1H), 8.16–8.11 (m, 2H), 7.53–7.47 (m, 3H), 7.36 (s, 1H), 2.87 (s, 3H); <sup>13</sup>C NMR (100 MHz, CDCl<sub>3</sub>): δ (ppm) 159.0, 150.2, 147.6, 147.1, 135.6, 131.4, 128.9, 127.5, 113.3, 107.2, 82.6, 17.4; HRMS (ESI): m/z [M + Na]<sup>+</sup> calcd for C<sub>14</sub>H<sub>10</sub>N<sub>4</sub>Na: 257.0798; found: 257.0796.

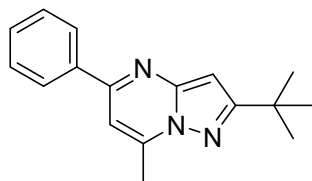

**2-(tert-butyl)-7-methyl-5-phenylpyrazolo[1,5-a]pyrimidine (3ap) (CAS: 2699782-21-1):**

Yield 61% (80.8 mg; petroleum ether/EtOAc = 100:1); yellow oil; <sup>1</sup>H NMR (400 MHz, CDCl<sub>3</sub>): δ (ppm) 8.08–8.06 (m, 1H), 8.06–8.04 (m, 1H), 7.52–7.46 (m, 3H), 7.05 (s, 1H), 6.57

(s, 1H), 2.82 (s, 3H), 1.44 (s, 9H);  $^{13}\text{C}$  NMR (100 MHz,  $\text{CDCl}_3$ ):  $\delta$  (ppm) 167.9, 155.1, 149.2, 145.7, 137.9, 129.8, 128.8, 127.2, 104.1, 93.0, 32.9, 30.5, 17.5; HRMS (ESI):  $m/z$   $[\text{M} + \text{H}]^+$  calcd for  $\text{C}_{17}\text{H}_{20}\text{N}_3$ : 266.1652; found: 266.1655.

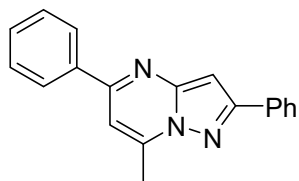

**7-methyl-2,5-diphenylpyrazolo[1,5-*a*]pyrimidine (3aq) (CAS: 331978-87-1):**

Yield 46% (65.5 mg; petroleum ether/EtOAc = 100:1); yellow solid; mp 110–113 °C;  $^1\text{H}$  NMR (400 MHz,  $\text{CDCl}_3$ ):  $\delta$  (ppm) 8.12–8.08 (m, 2H), 8.07–8.02 (m, 2H), 7.53–7.46 (m, 5H), 7.43–7.39 (m, 1H), 7.15 (s, 1H), 7.02 (s, 1H), 2.91 (s, 3H);  $^{13}\text{C}$  NMR (100 MHz,  $\text{CDCl}_3$ ):  $\delta$  (ppm) 156.2, 155.8, 150.0, 145.8, 137.6, 133.2, 130.1, 128.9, 128.9, 128.8, 127.2, 126.6, 105.0, 93.8, 17.6; HRMS (ESI):  $m/z$   $[\text{M} + \text{H}]^+$  calcd for  $\text{C}_{19}\text{H}_{16}\text{N}_3$ : 286.1339; found: 286.1338.

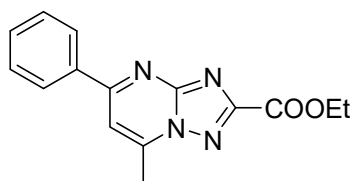

**ethyl 7-methyl-5-phenyl-[1,2,4]triazolo[1,5-*a*]pyrimidine-2-carboxylate (3ar) (CAS: 1707085-17-3):**

Yield 57% (80.4 mg; petroleum ether/EtOAc = 4:1); white solid; mp 172–174 °C;  $^1\text{H}$  NMR (400 MHz,  $\text{CDCl}_3$ ):  $\delta$  (ppm) 8.22–8.18 (m, 2H), 7.56–7.51 (m, 4H), 4.58 (q,  $J = 7.2$  Hz, 2H), 2.97 (s, 3H), 1.50 (t,  $J = 7.2$  Hz, 3H);  $^{13}\text{C}$  NMR (100 MHz,  $\text{CDCl}_3$ ):  $\delta$  (ppm) 162.4, 160.4, 157.5, 155.7, 148.0, 135.8, 131.7, 129.1, 127.8, 108.5, 62.5, 17.6, 14.2; HRMS (ESI):  $m/z$   $[\text{M} + \text{H}]^+$  calcd for  $\text{C}_{15}\text{H}_{15}\text{N}_4\text{O}_2$ : 283.1190; found: 283.1189.

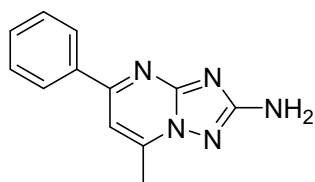

**7-methyl-5-phenyl-[1,2,4]triazolo[1,5-*a*]pyrimidin-2-amine (3as) (CAS: 72966-18-8):**

Yield 45% (50.6 mg; petroleum ether/EtOAc = 2:1); light brown solid; mp 202–205 °C;  $^1\text{H}$  NMR (400 MHz,  $\text{CDCl}_3$ ):  $\delta$  (ppm) 8.16–8.13 (m, 2H), 7.52–7.48 (m, 3H), 7.26 (s, 1H), 4.73 (s, 2H), 2.76 (s, 3H);  $^{13}\text{C}$  NMR (100 MHz,  $\text{CDCl}_3$ ):  $\delta$  (ppm) 166.7, 159.3, 155.8, 145.5, 136.7, 130.7, 128.9, 127.4, 105.5, 17.5; HRMS (ESI):  $m/z$   $[\text{M} + \text{H}]^+$  calcd for  $\text{C}_{12}\text{H}_{12}\text{N}_5$ : 226.1087; found: 226.1091.

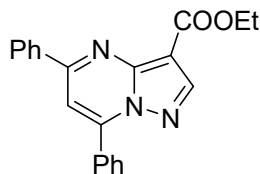

**ethyl 5,7-diphenylpyrazolo[1,5-*a*]pyrimidine-3-carboxylate (4):**

Yield 73% (125.2 mg; petroleum ether/EtOAc = 20:1); yellow solid; mp 92–95 °C; <sup>1</sup>H NMR (400 MHz, CDCl<sub>3</sub>): δ (ppm) 8.60 (s, 1H), 8.29–8.24 (m, 2H), 8.05–8.00 (m, 2H), 7.62–7.58 (m, 3H), 7.54–7.50 (m, 4H), 4.47 (q, *J* = 7.2 Hz, 2H), 1.48 (t, *J* = 7.0 Hz, 3H); <sup>13</sup>C NMR (100 MHz, CDCl<sub>3</sub>): δ (ppm) 162.8, 158.9, 148.8, 147.8, 147.7, 136.5, 131.3, 131.1, 130.7, 129.4, 128.9, 128.8, 127.6, 106.3, 103.0, 60.2, 14.5; HRMS (ESI): *m/z* [M + H]<sup>+</sup> calcd for C<sub>21</sub>H<sub>18</sub>N<sub>3</sub>O<sub>2</sub>: 344.1394; found: 344.1393.

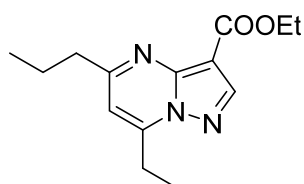

**ethyl 7-ethyl-5-propylpyrazolo[1,5-*a*]pyrimidine-3-carboxylate (5):**

Yield 67% (62.7 mg; petroleum ether/EtOAc = 5:1); light yellow solid; mp 50–52 °C; <sup>1</sup>H NMR (400 MHz, CDCl<sub>3</sub>): δ (ppm) 8.60 (s, 1H), 8.53 (s, 1H), 4.44 (q, *J* = 7.2 Hz, 2H), 3.24–3.18 (m, 2H), 2.78 (q, *J* = 7.6 Hz, 2H), 1.87–1.77 (m, 2H), 1.42 (t, *J* = 7.2 Hz, 3H), 1.30 (t, *J* = 7.6 Hz, 3H), 1.09 (t, *J* = 7.4 Hz, 3H); <sup>13</sup>C NMR (100 MHz, CDCl<sub>3</sub>): δ (ppm) 162.8, 154.1, 148.0, 146.9, 146.7, 122.8, 102.6, 60.2, 29.1, 21.9, 20.4, 15.8, 14.6, 14.2; HRMS (ESI): *m/z* [M + Na]<sup>+</sup> calcd for C<sub>14</sub>H<sub>19</sub>N<sub>3</sub>NaO<sub>2</sub>: 284.1369; found: 284.1371.

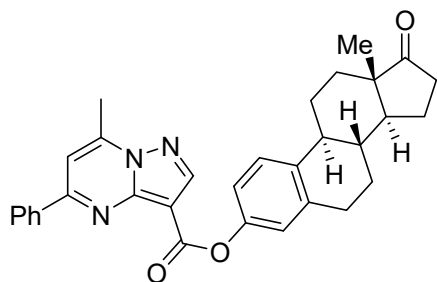

**(8*R*,9*S*,13*S*,14*S*)-13-methyl-17-oxo-7,8,9,11,12,13,14,15,16,17-decahydro-6*H*-cyclopenta[*a*]phenanthren-3-yl 7-methyl-5-phenylpyrazolo[1,5-*a*]pyrimidine-3-carboxylate (6):**

Yield 84% (84.8 mg; petroleum ether/EtOAc = 2:1); white solid; mp 221–223 °C; <sup>1</sup>H NMR (400 MHz, CDCl<sub>3</sub>): δ (ppm) 8.71 (s, 1H), 8.24–8.17 (m, 2H), 7.50–7.44 (m, 3H), 7.37 (s, 1H), 7.33 (d, *J* = 8.4 Hz, 1H), 7.08 (dd, *J* = 8.4, 2.8 Hz, 1H), 7.06–7.02 (m, 1H), 2.99–2.91 (m, 2H), 2.89 (s, 3H), 2.56–2.47 (m, 1H), 2.46–2.38 (m, 1H), 2.35–2.26 (m, 1H), 2.20–2.10 (m, 1H), 2.10–1.95 (m, 3H), 1.67–1.43 (m, 6H), 0.92 (s, 3H); <sup>13</sup>C NMR (100 MHz, CDCl<sub>3</sub>): δ (ppm) 220.8, 161.2, 158.8, 148.7, 148.3, 147.8, 147.3, 137.7, 137.0, 136.2, 131.0, 128.8, 127.6, 126.2, 122.0, 119.1, 106.5, 102.0, 50.3, 47.9, 44.1, 37.9, 35.8, 31.5, 29.3, 26.3, 25.7, 21.5, 17.6, 13.8; HRMS (ESI): *m/z* [M + H]<sup>+</sup> calcd for C<sub>32</sub>H<sub>32</sub>N<sub>3</sub>O<sub>3</sub>: 506.2438; found: 506.2436.

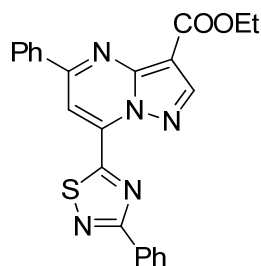

**ethyl**

**5-phenyl-7-(3-phenyl-1,2,4-thiadiazol-5-yl)pyrazolo[1,5-a]pyrimidine-3-carboxylate (7):**

Yield 74% (63.2mg; petroleum ether/EtOAc = 30:1); yellow solid; mp 238–240 °C; <sup>1</sup>H NMR (400 MHz, CDCl<sub>3</sub>): δ (ppm) 8.77 (s, 1H), 8.67 (s, 1H), 8.46–8.42 (m, 2H), 8.41–8.35 (m, 2H), 7.62–7.51 (m, 6H), 4.49 (q, *J* = 7.2 Hz, 2H), 1.50 (t, *J* = 7.2 Hz, 3H); <sup>13</sup>C NMR (100 MHz, CDCl<sub>3</sub>): δ (ppm) 174.6, 172.6, 162.4, 159.3, 147.7, 147.5, 136.3, 136.2, 132.1, 131.6, 130.8, 129.2, 128.8, 128.3, 127.9, 104.5, 104.1, 60.6, 14.5; HRMS (ESI): *m/z* [M + Na]<sup>+</sup> calcd for C<sub>23</sub>H<sub>17</sub>N<sub>5</sub>NaO<sub>2</sub>S: 450.0995; found: 450.0990.

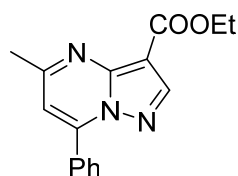

**ethyl 5-methyl-7-phenylpyrazolo[1,5-a]pyrimidine-3-carboxylate (9):**

Yield 81% (113.8 mg; petroleum ether/EtOAc = 5:1); yellow solid; mp 117–119 °C; <sup>1</sup>H NMR (400 MHz, CDCl<sub>3</sub>): δ (ppm) 8.52 (s, 1H), 7.99–7.94 (m, 2H), 7.60–7.54 (m, 3H), 6.95 (s, 1H), 4.43 (q, *J* = 7.2 Hz, 2H), 2.77 (s, 3H), 1.43 (t, *J* = 7.2 Hz, 3H); <sup>13</sup>C NMR (100 MHz, CDCl<sub>3</sub>): δ (ppm) 162.8, 162.6, 148.8, 147.0, 146.9, 131.2, 130.2, 129.3, 128.6, 110.0, 101.9, 60.1, 25.3, 14.4; HRMS (ESI): *m/z* [M + Na]<sup>+</sup> calcd for C<sub>16</sub>H<sub>15</sub>N<sub>3</sub>NaO<sub>2</sub>: 304.1056; found: 304.1055.

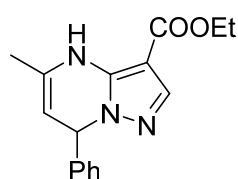

**ethyl 5-methyl-7-phenyl-4,7-dihydropyrazolo[1,5-a]pyrimidine-3-carboxylate (11):**

Yield 88% (124.5 mg; petroleum ether/EtOAc = 30:1); white solid; mp 149–151 °C; <sup>1</sup>H NMR (400 MHz, CDCl<sub>3</sub>): δ (ppm) 7.65 (s, 1H), 7.36–7.31 (m, 2H), 7.30–7.26 (m, 1H), 7.26–7.22 (m, 2H), 7.18 (s, 1H), 5.95–5.92 (m, 1H), 4.63–4.60 (m, 1H), 4.29 (q, *J* = 7.2 Hz, 2H), 1.97 (s, 3H), 1.35 (t, *J* = 7.2 Hz, 3H); <sup>13</sup>C NMR (100 MHz, CDCl<sub>3</sub>): δ (ppm) 164.3, 143.0, 142.0, 139.9, 129.6, 128.7, 128.1, 126.8, 97.1, 94.5, 60.4, 59.8, 18.9, 14.4; HRMS (ESI): *m/z* [M + H]<sup>+</sup> calcd for C<sub>16</sub>H<sub>18</sub>N<sub>3</sub>O<sub>2</sub>: 284.1394; found: 284.1393.

## 7. Crystallographic data and molecular structure of **3a**

The crystal of **3a** for X-ray diffraction study has been obtained through the dissolving of compound in CHCl<sub>3</sub>, followed by slow evaporation of the solvent at room temperature. The crystal was kept at 296(2) during data collection. CCDC 2152909 contains the supplementary crystallographic data for this paper. This data can be obtained free of charge from the Cambridge Crystallographic Data Centre via [www.ccdc.cam.ac.uk/data\\_request/cif](http://www.ccdc.cam.ac.uk/data_request/cif).

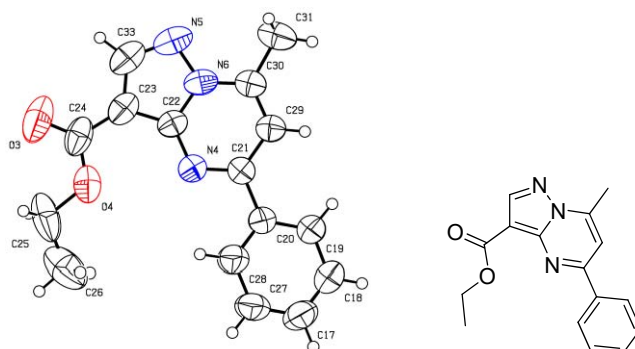

**Figure S1.** X-ray crystal structure of **3a**; the ellipsoids depicted at the 50% probability level.

|                      |                                                               |                |                                   |                                                   |
|----------------------|---------------------------------------------------------------|----------------|-----------------------------------|---------------------------------------------------|
| Empirical formula    | C <sub>32</sub> H <sub>30</sub> N <sub>6</sub> O <sub>4</sub> |                | Absorption coefficient            | 0.088 mm <sup>-1</sup>                            |
| Formula weight       | 562.62                                                        |                | F(000)                            | 1184.0                                            |
| Temperature          | 296(2) K                                                      |                | Crystal size                      | 0.130 × 0.110 × 0.090 mm <sup>3</sup>             |
| Crystal system       | monoclinic                                                    |                | Theta range for data collection   | 2.944 to 50.498°                                  |
| Space group          | P2 <sub>1</sub> /c                                            |                | Reflections collected             | 14990                                             |
| Unit cell dimensions | a =<br>7.521(2) Å                                             | α = 90°        | Independent reflections           | 5222 [R(int) = 0.0761]                            |
|                      | b =<br>18.826(6) Å                                            | β = 97.770(4)° | Data / restraints / parameters    | 5222/0/383                                        |
|                      | c =<br>20.597(6) Å                                            | γ = 90°        | Goodness-of-fit on F <sup>2</sup> | 1.021                                             |
| Volume               | 2889.6(15) Å <sup>3</sup>                                     |                | Final R indices [I > 2σ(I)]       | R <sub>1</sub> = 0.0705, wR <sub>2</sub> = 0.1599 |
| Z                    | 4                                                             |                | R indices (all data)              | R <sub>1</sub> = 0.1669, wR <sub>2</sub> = 0.2063 |
| Density (calculated) | 1.293 Mg/m <sup>3</sup>                                       |                | Largest diff. peak and hole       | 0.15/-0.25 e.Å <sup>-3</sup>                      |

## 8. References

- (1) X. Jiang, G. Wang, Z. Zheng, X. Yu, Y. Hong, H. Xia, C. Yu, Autocatalytic Synthesis of Thioesters via Thiocarbonylation of *gem*-Difluoroalkenes, *Org. Lett.*, 2020, **22**, 9762–9766.
- (2) H. Xie, J. Cai, Z. Wang, H. Huang, G.-J. Deng, A Three-Component Approach to 3,5-Diaryl-1,2,4-thiadiazoles under Transition-Metal-Free Conditions, *Org. Lett.*, 2016, **18**, 2196–2199.

## 9. NMR spectra

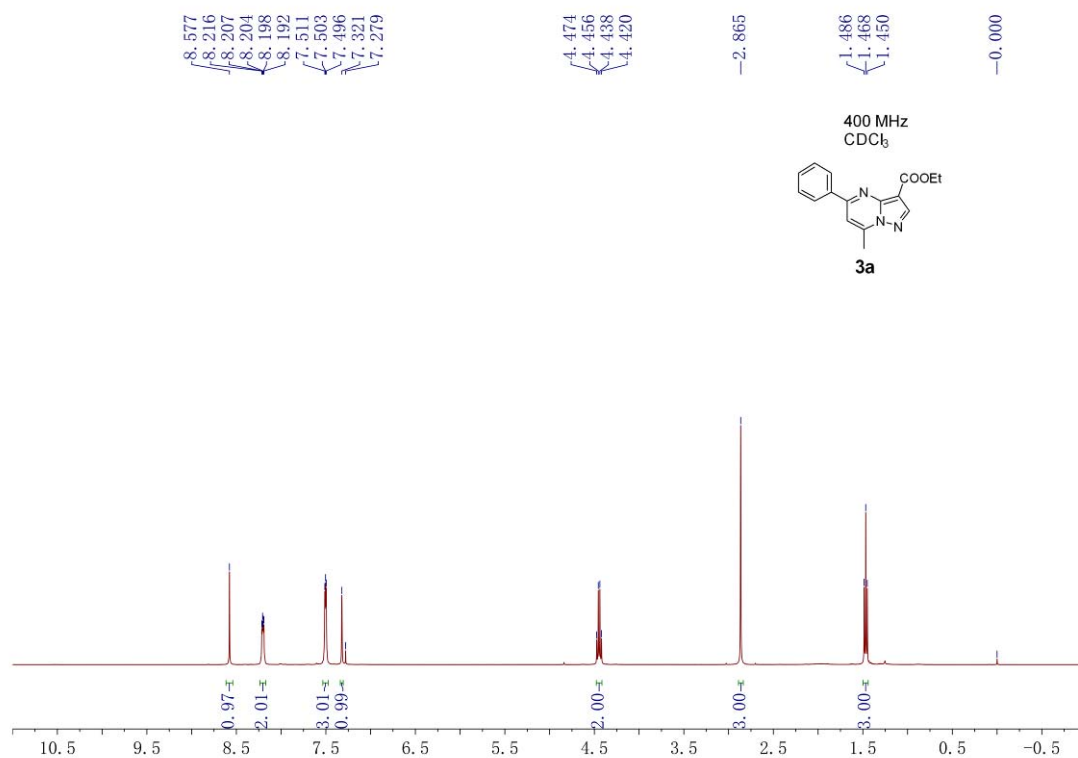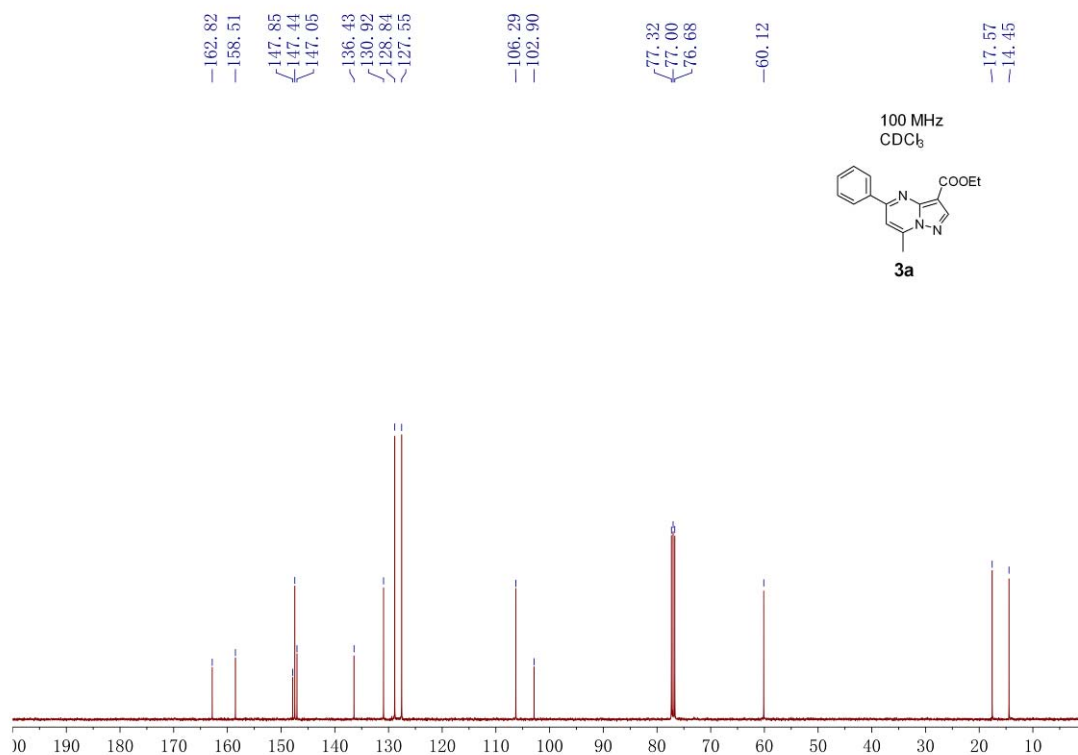



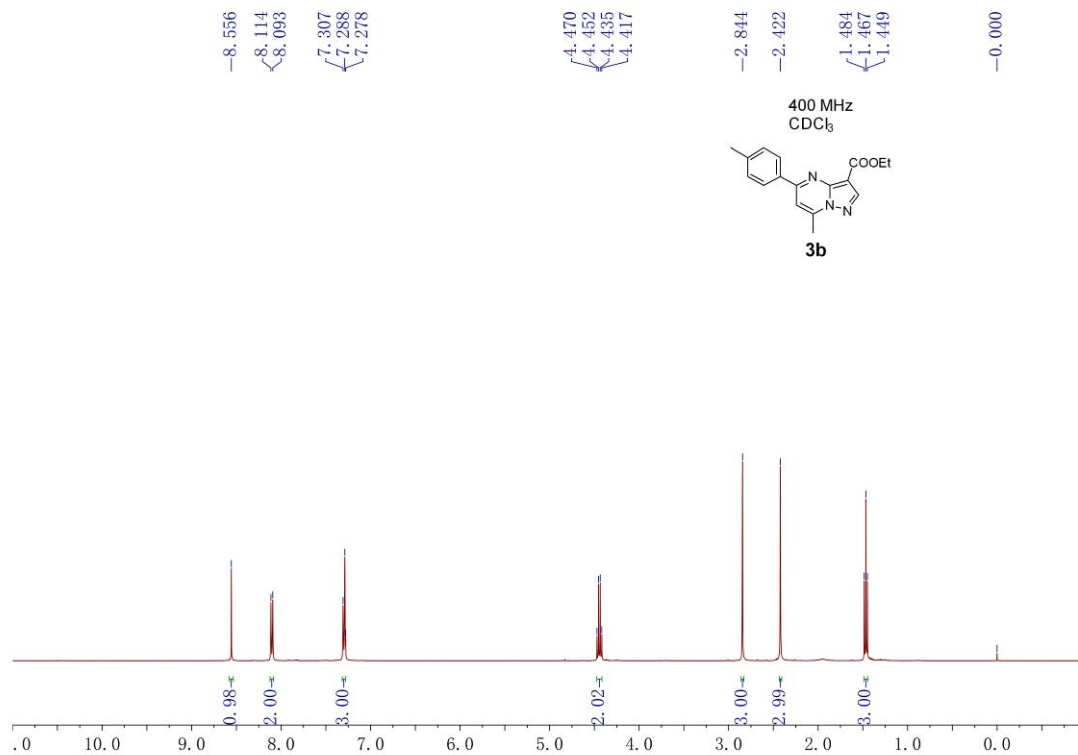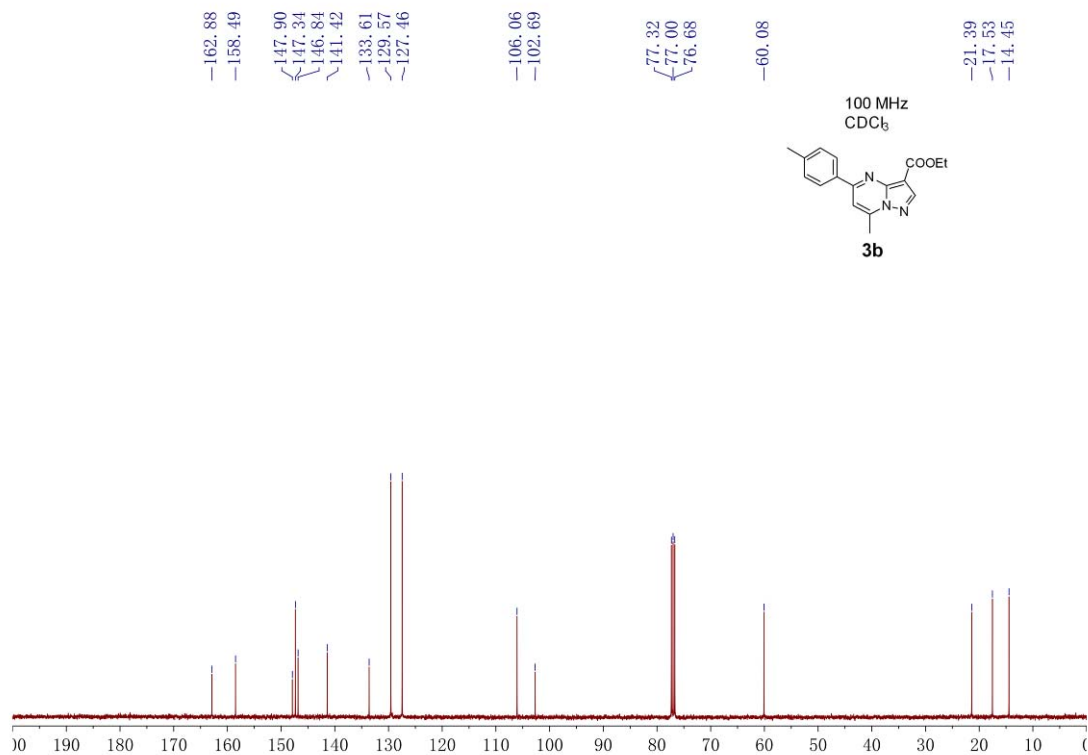

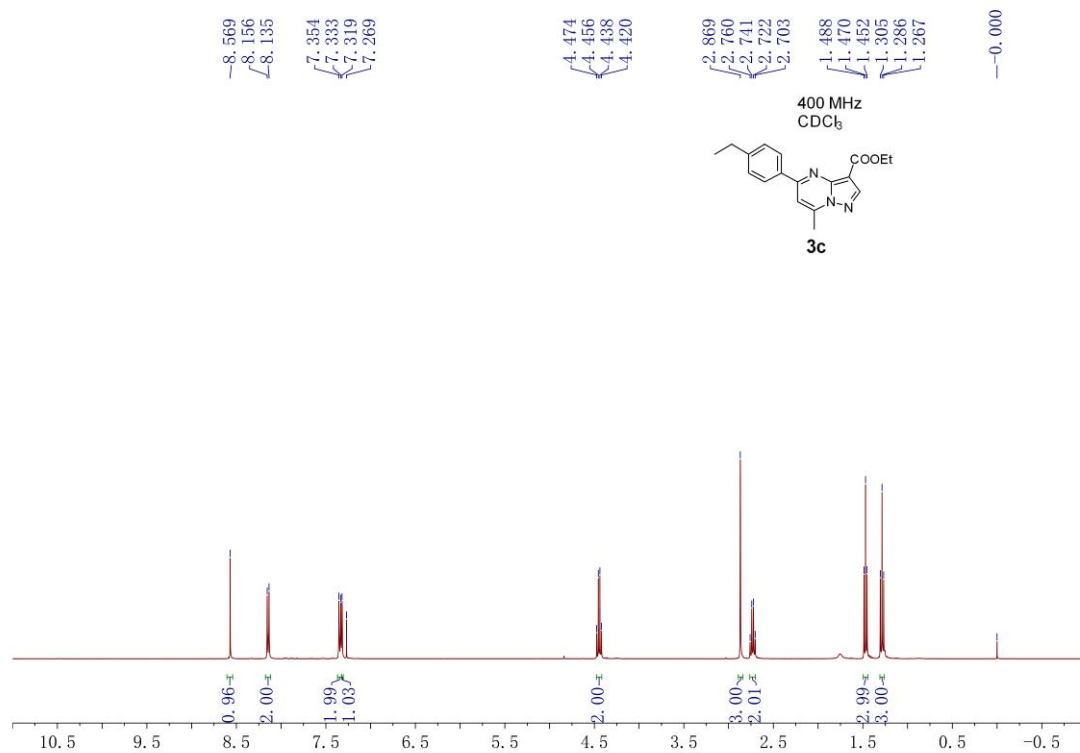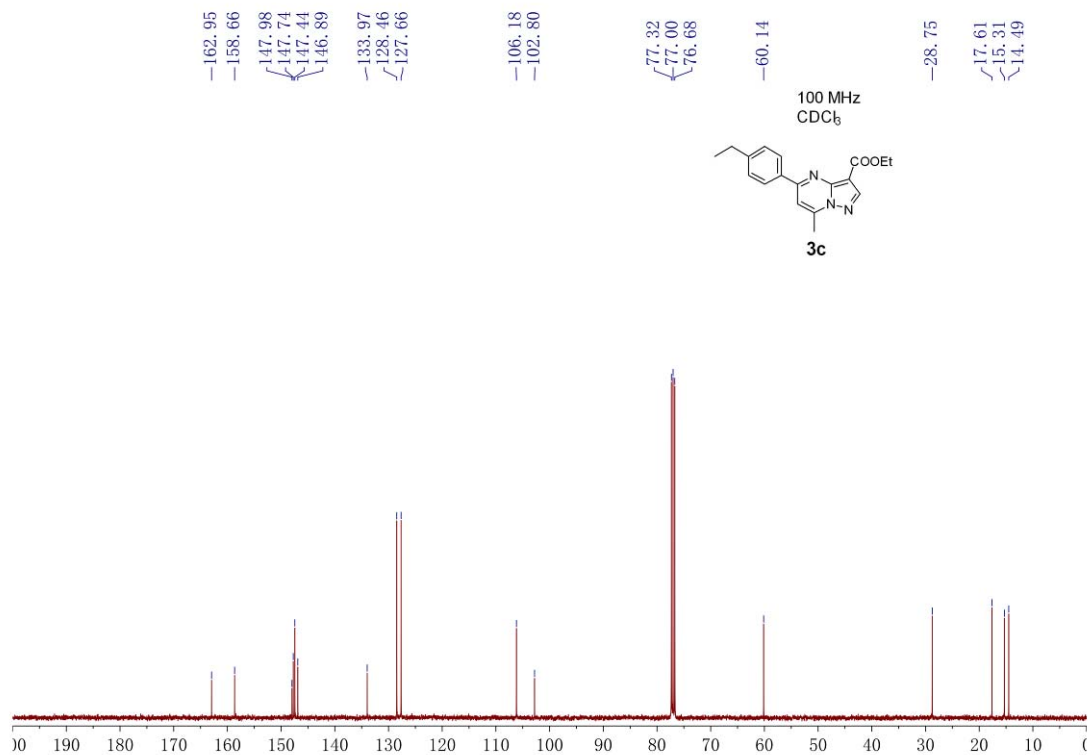

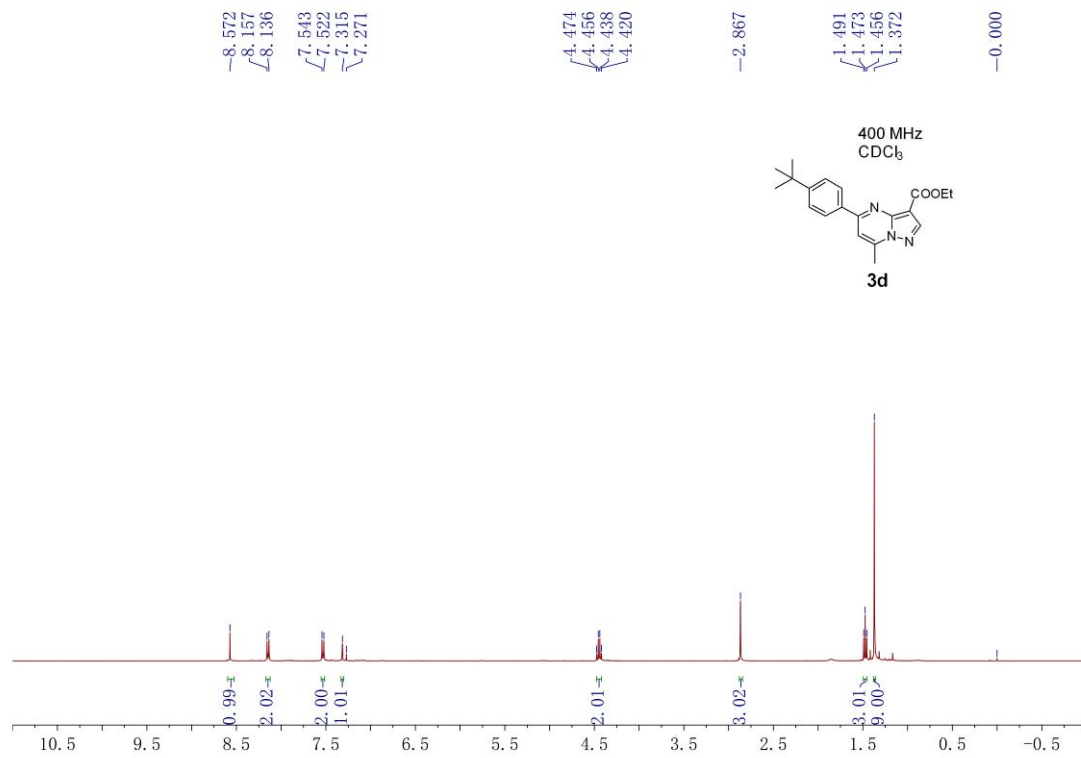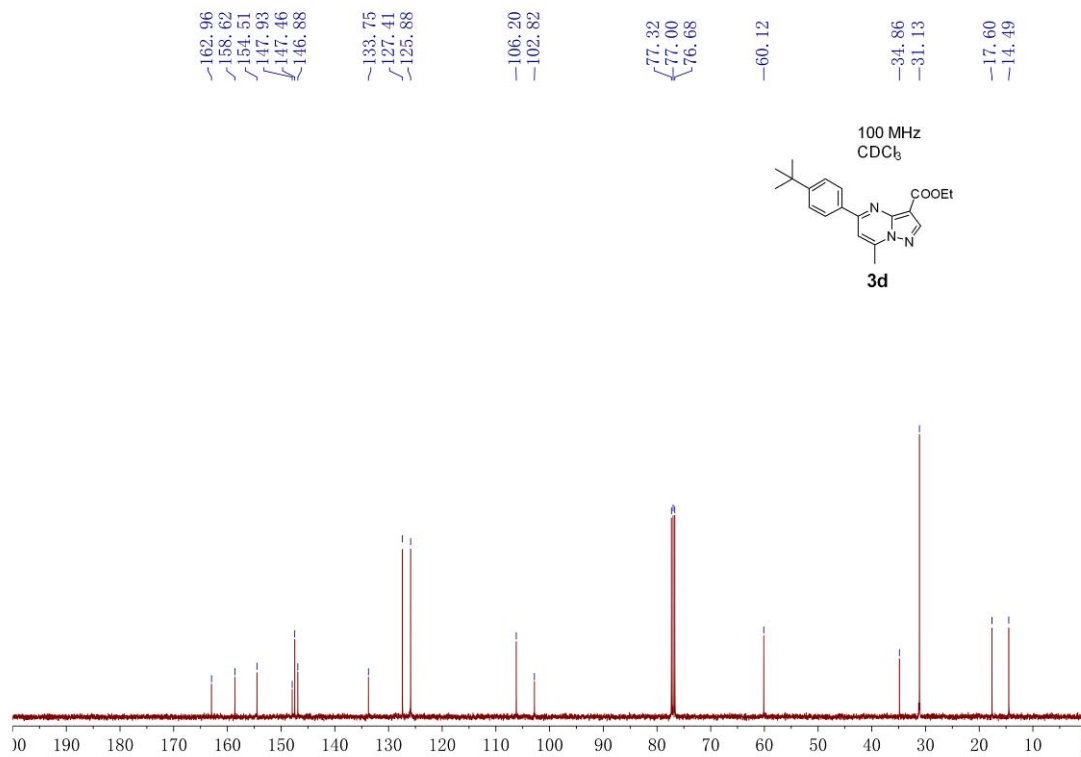

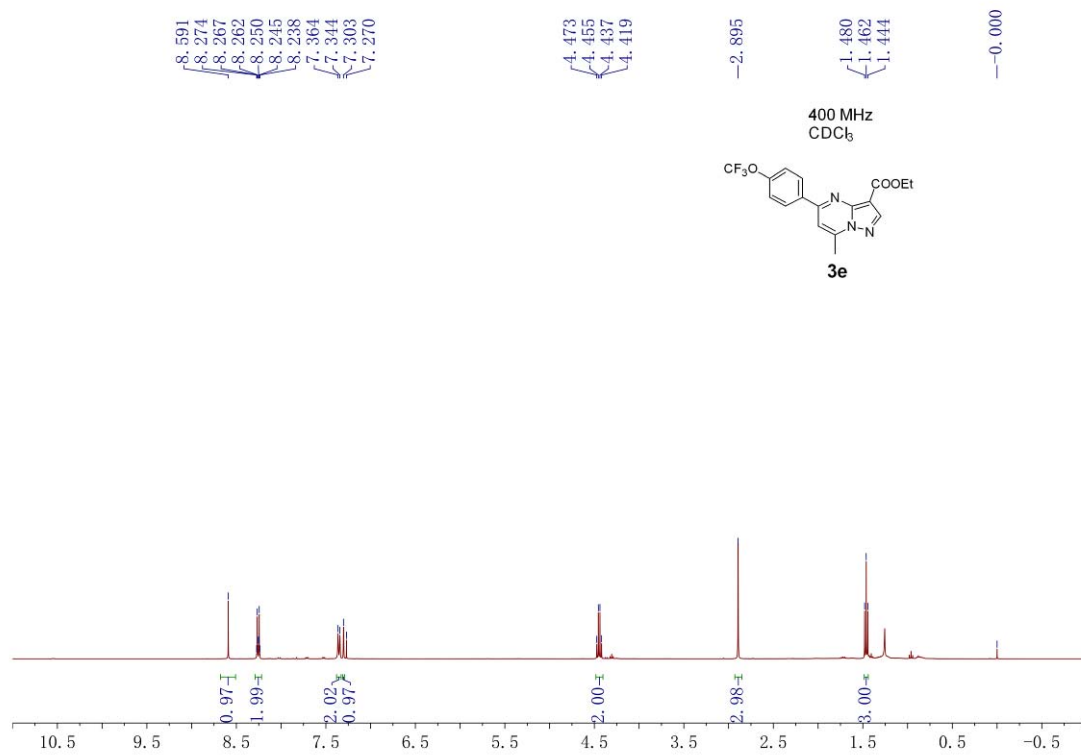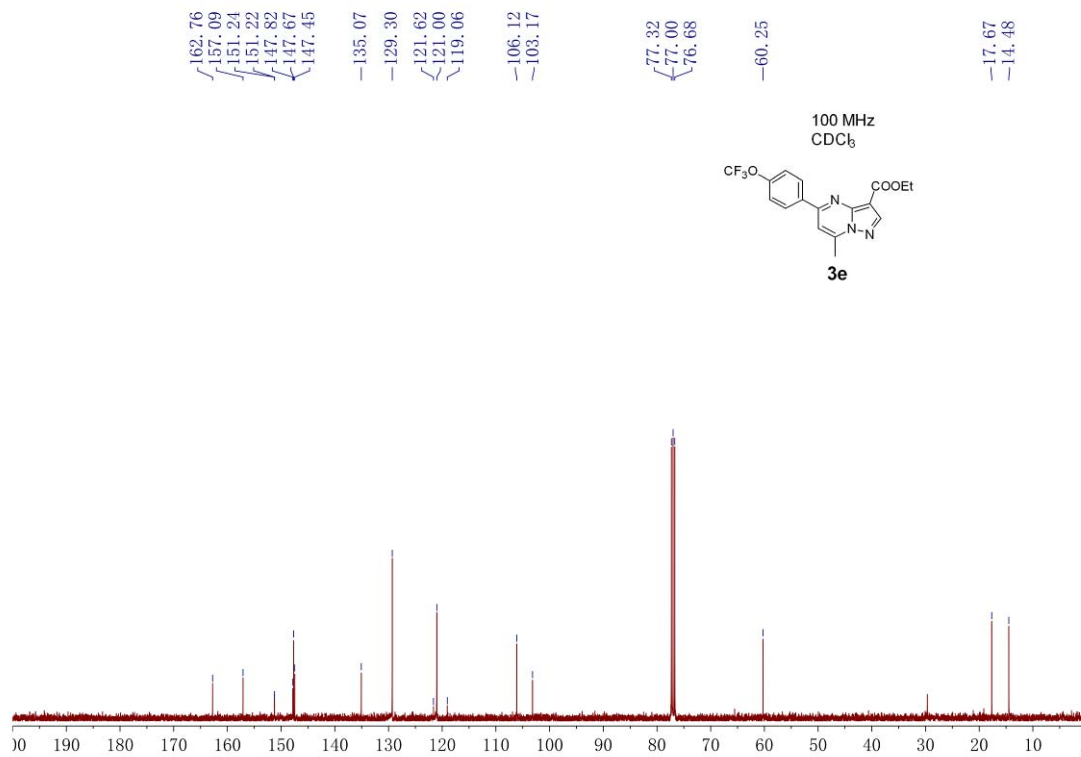

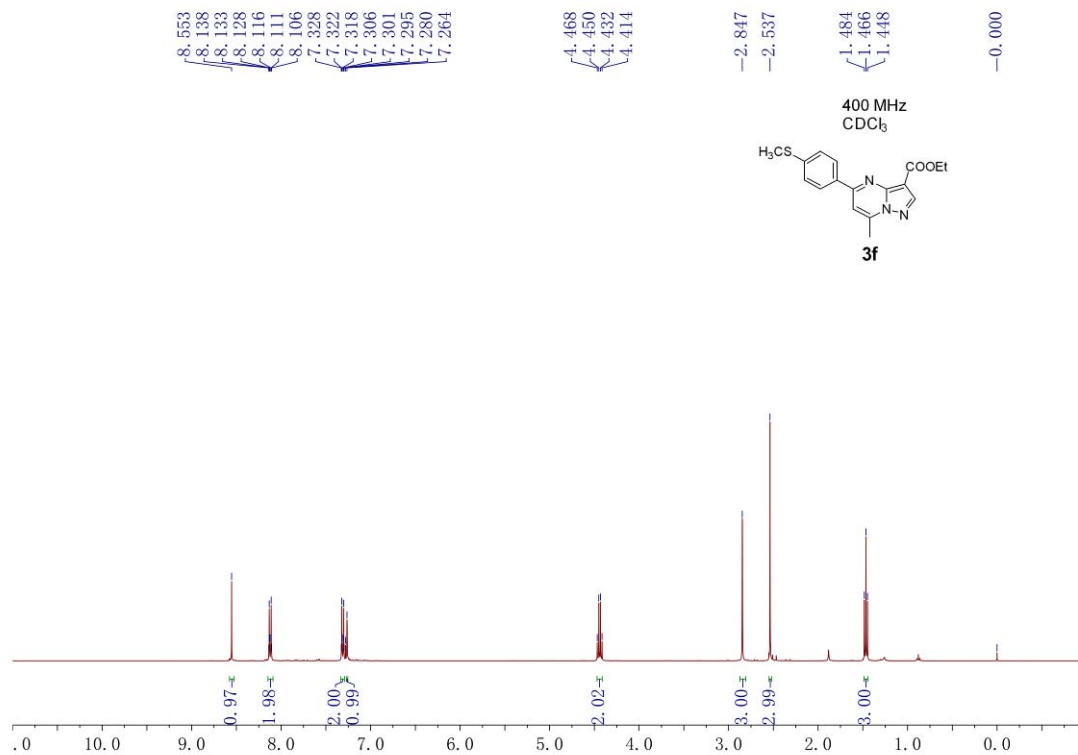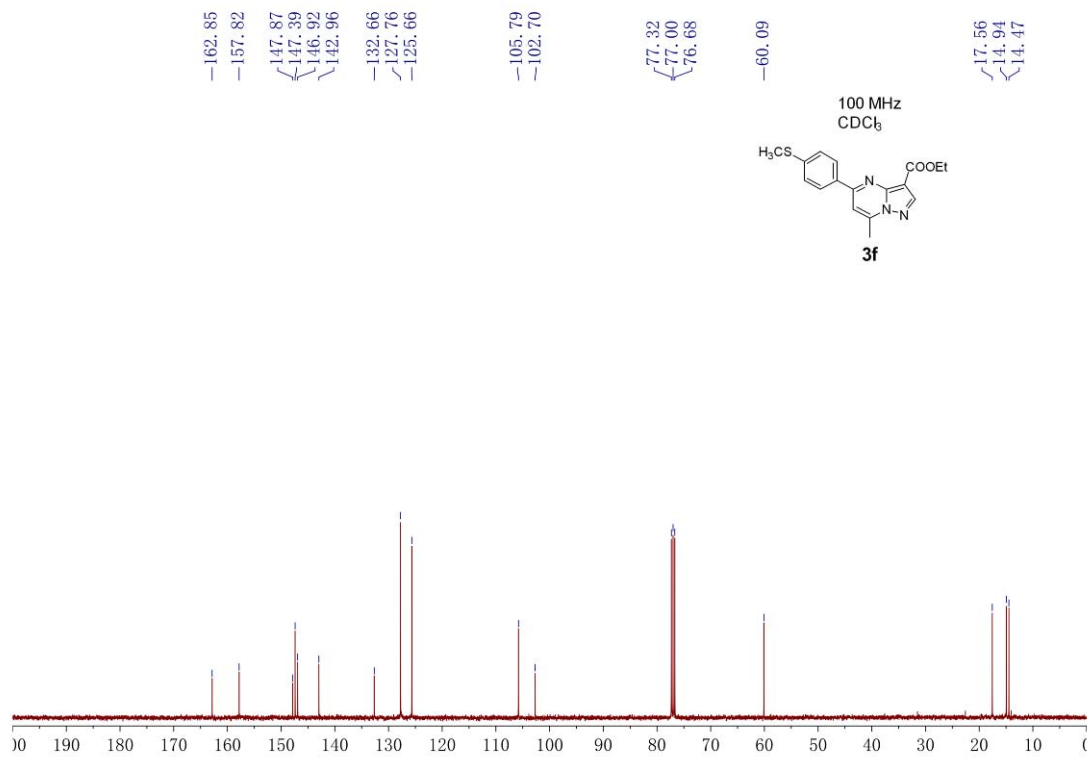

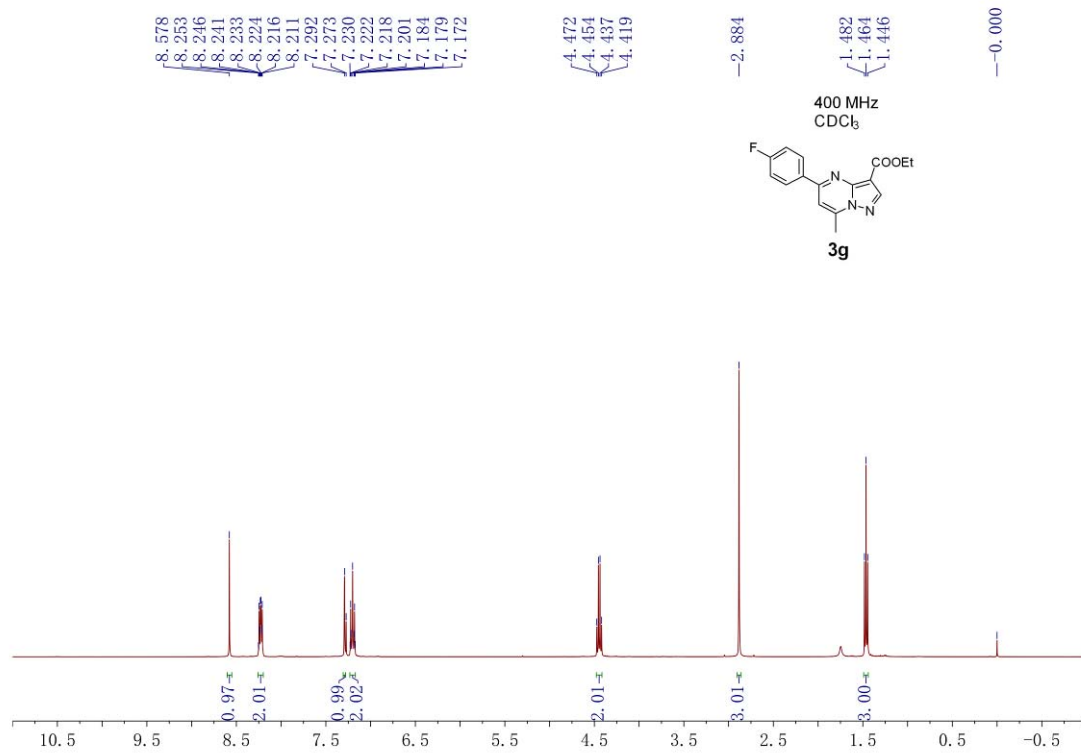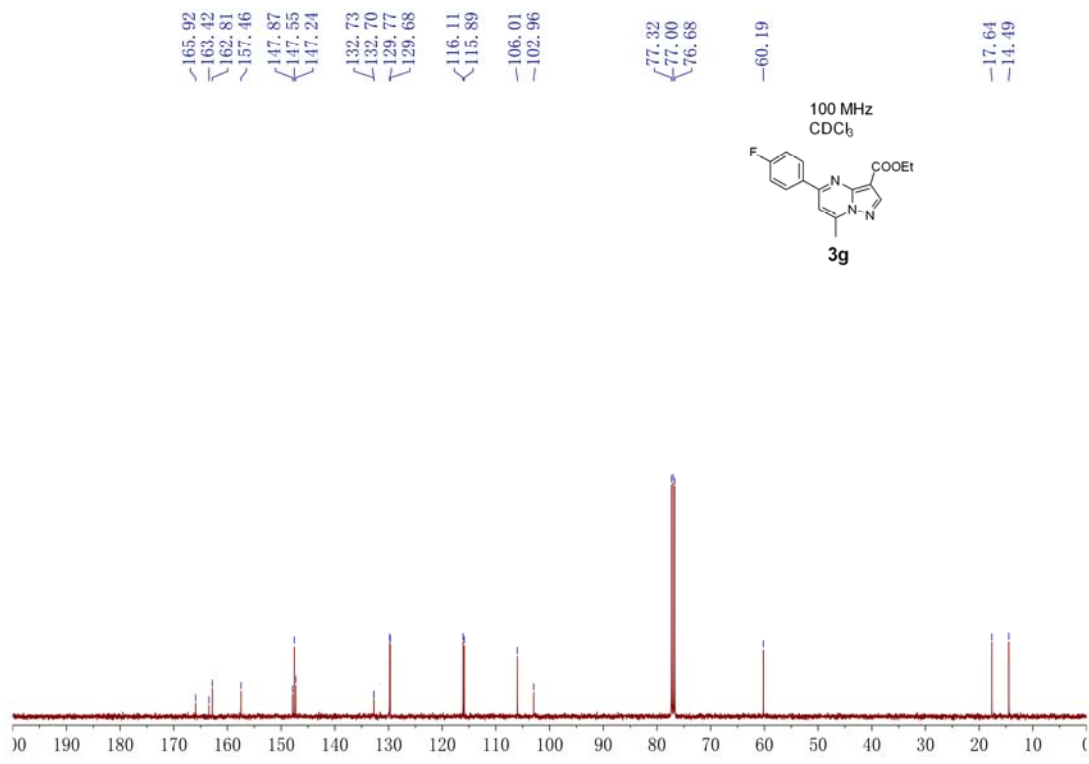

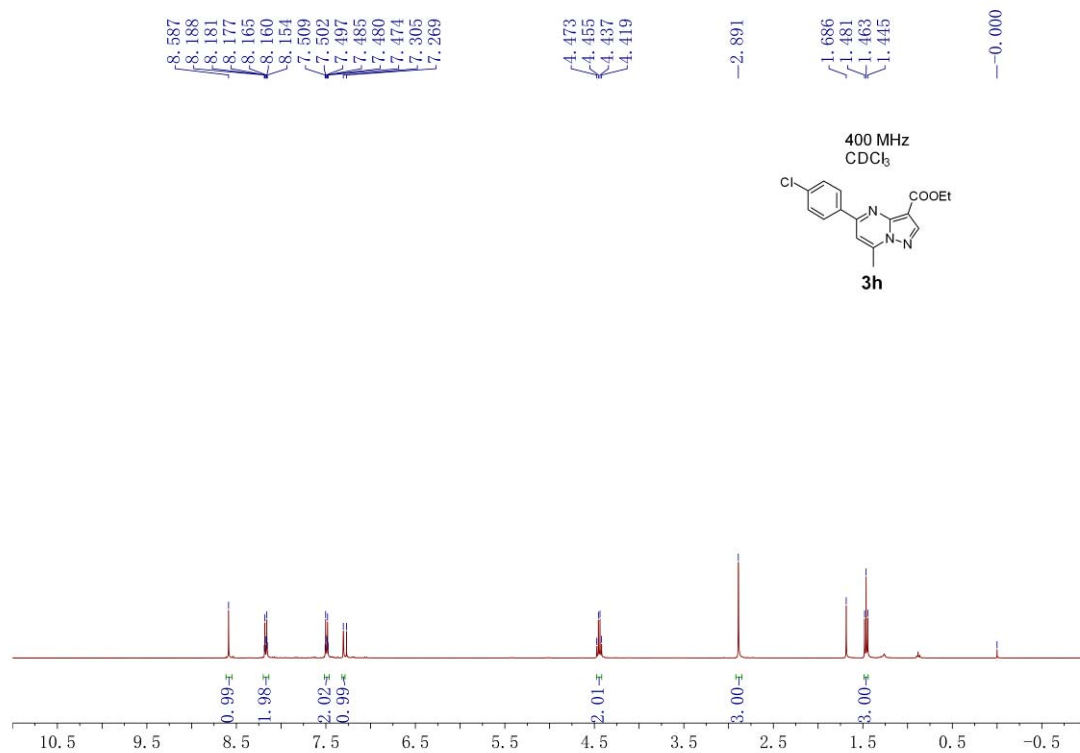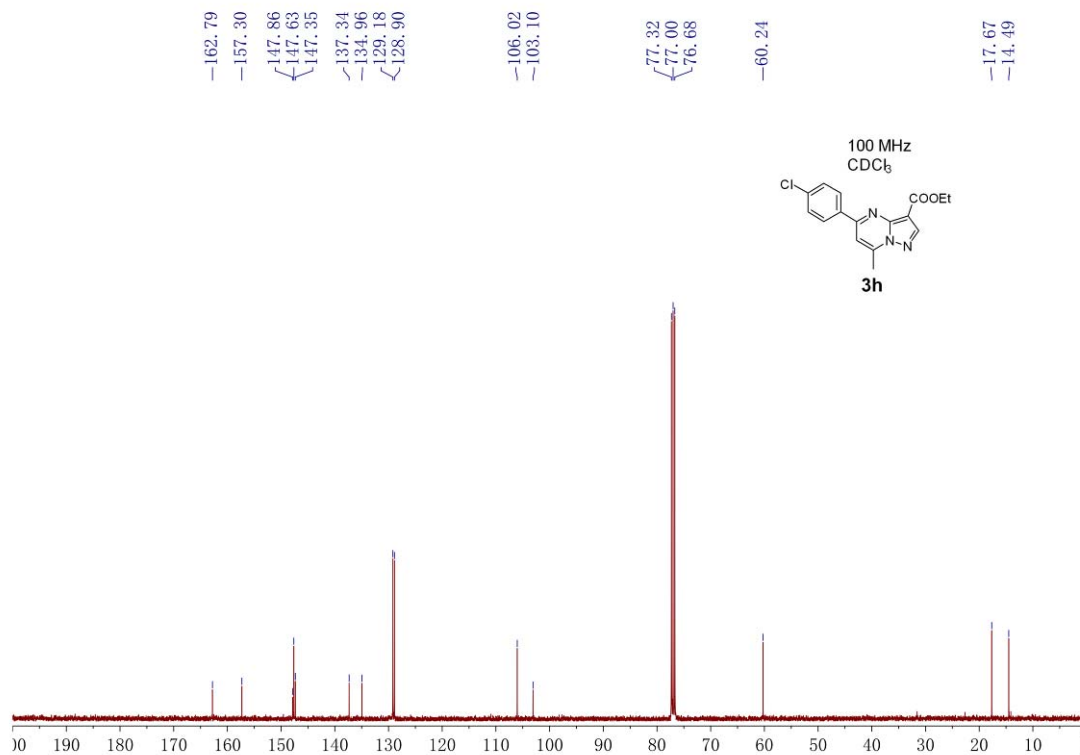

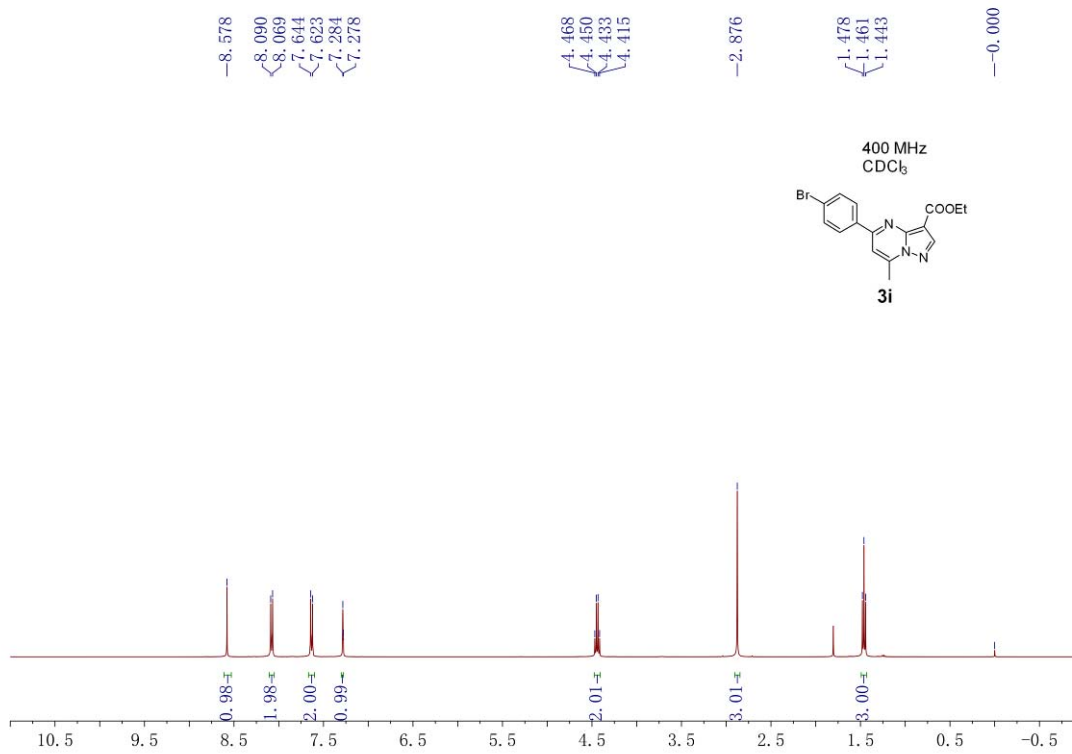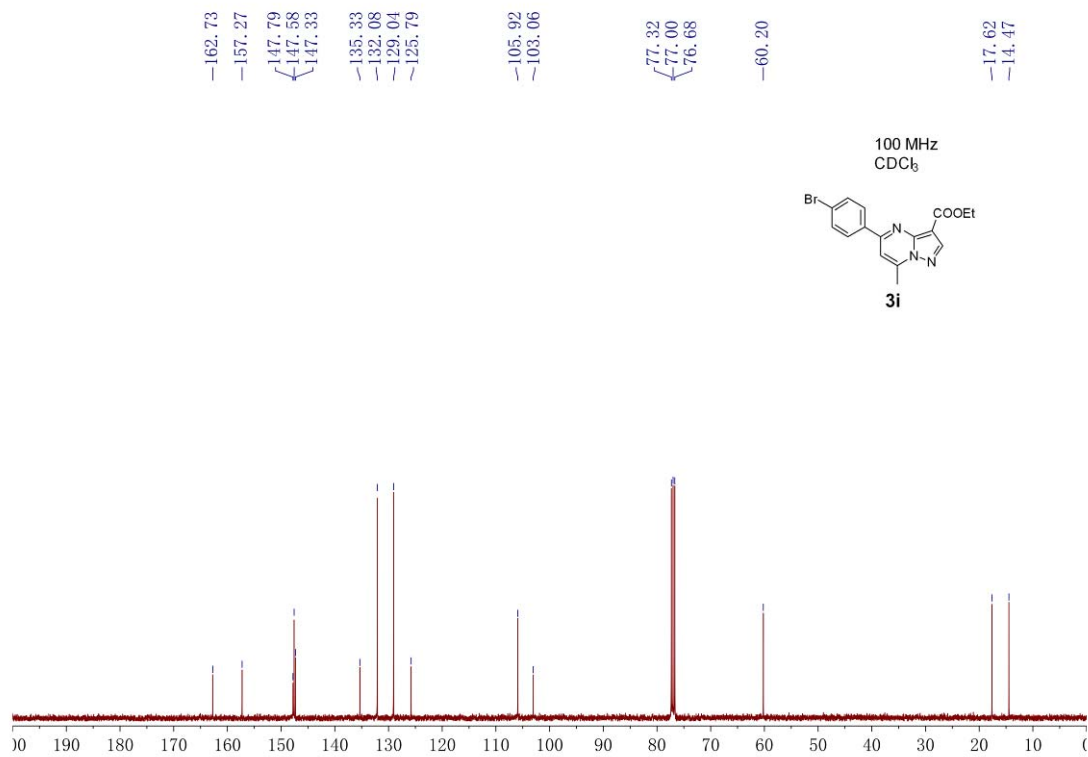



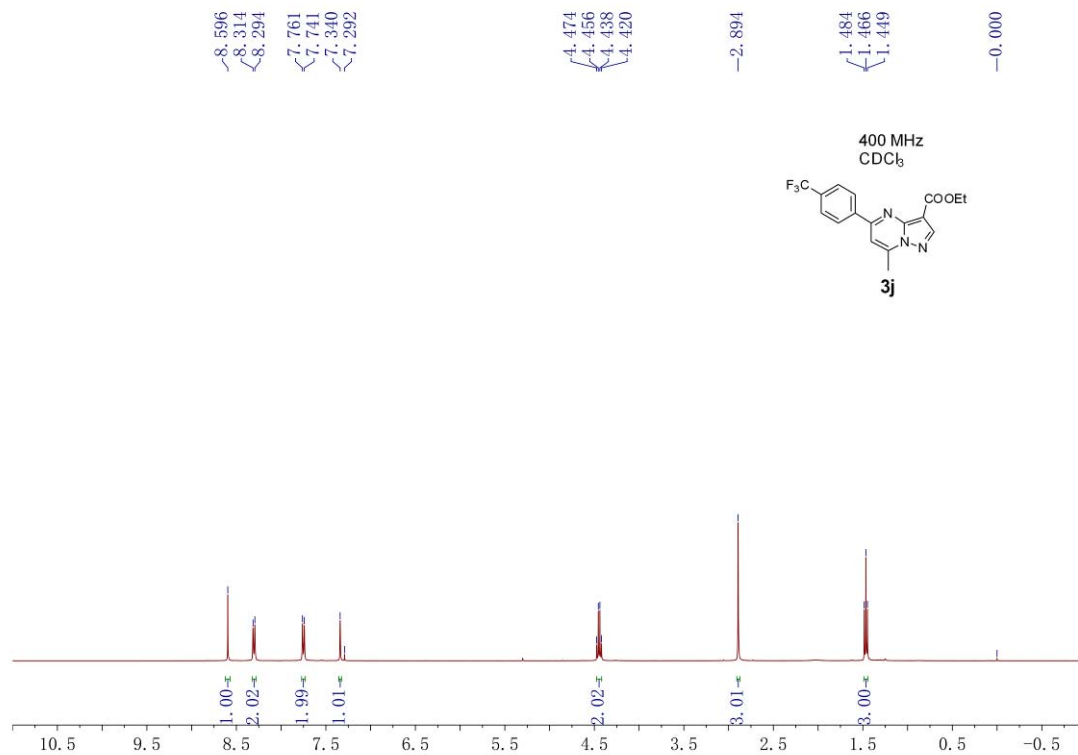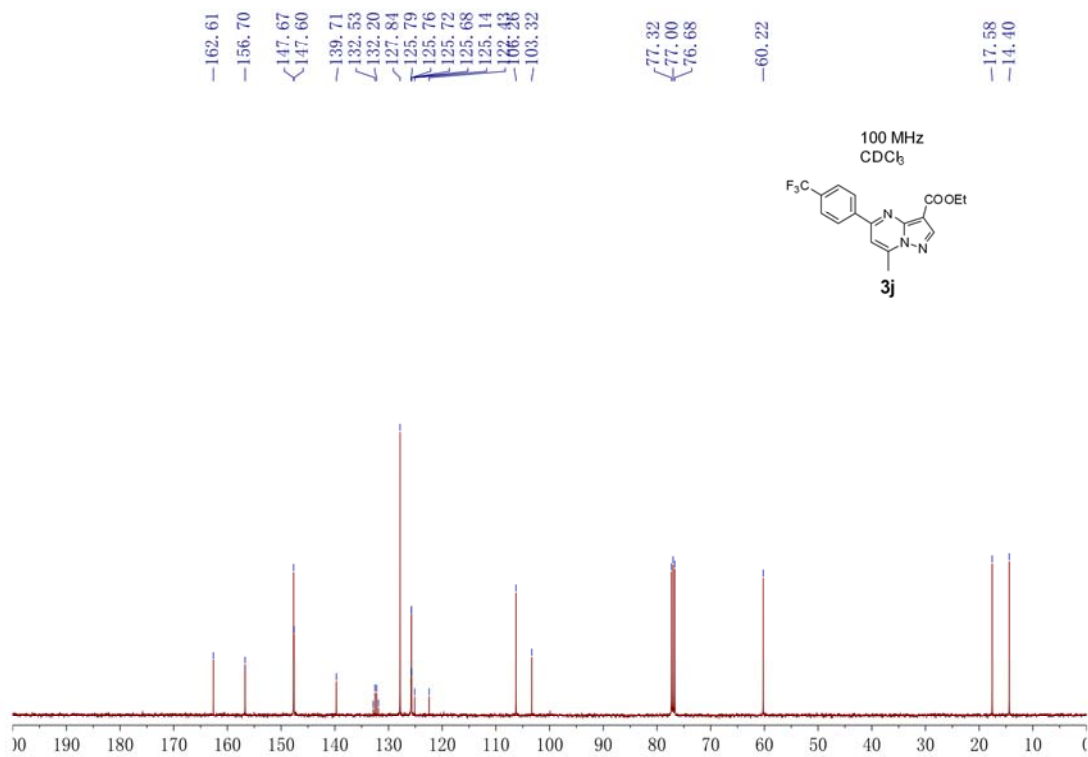

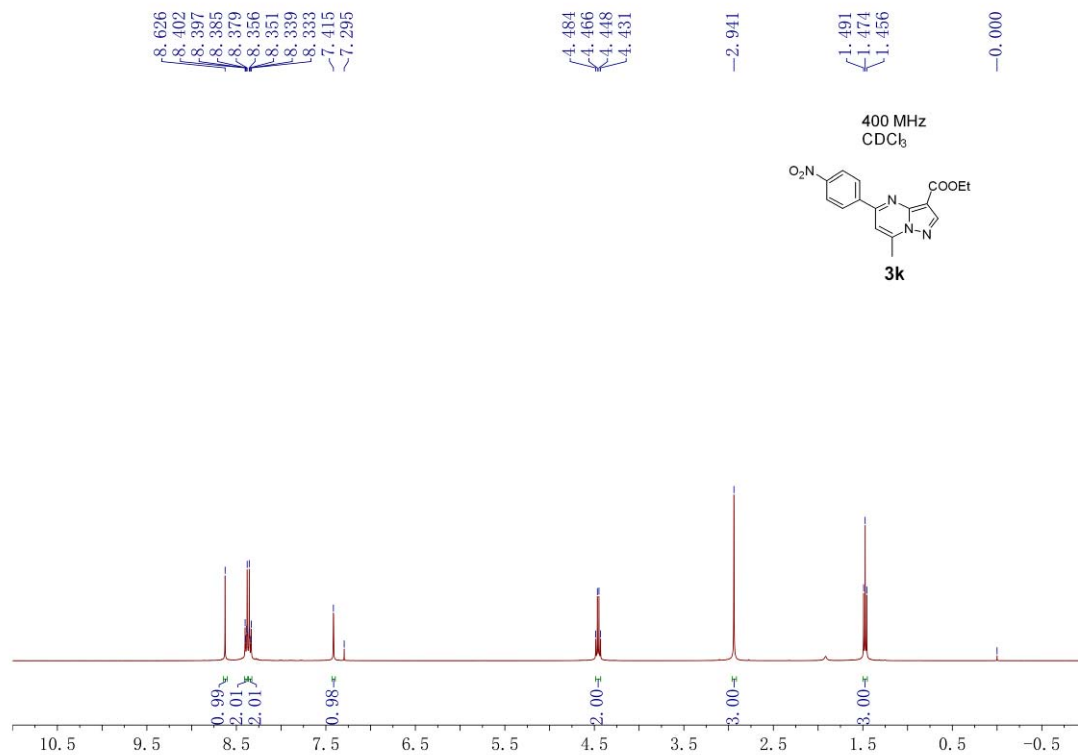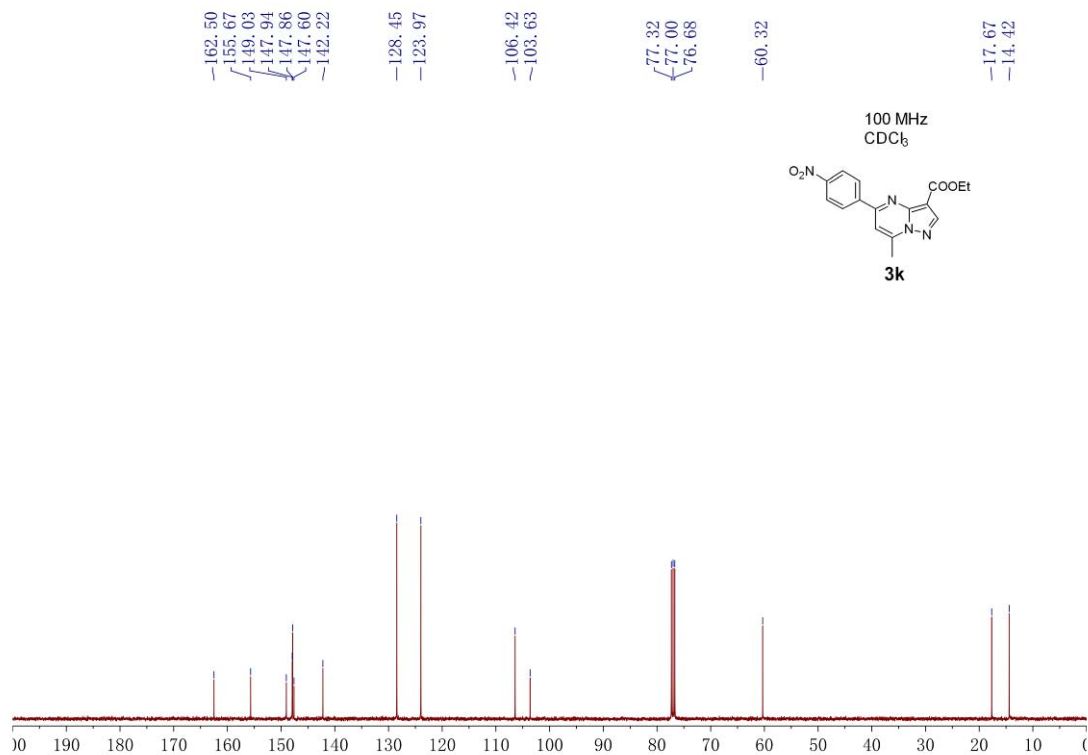

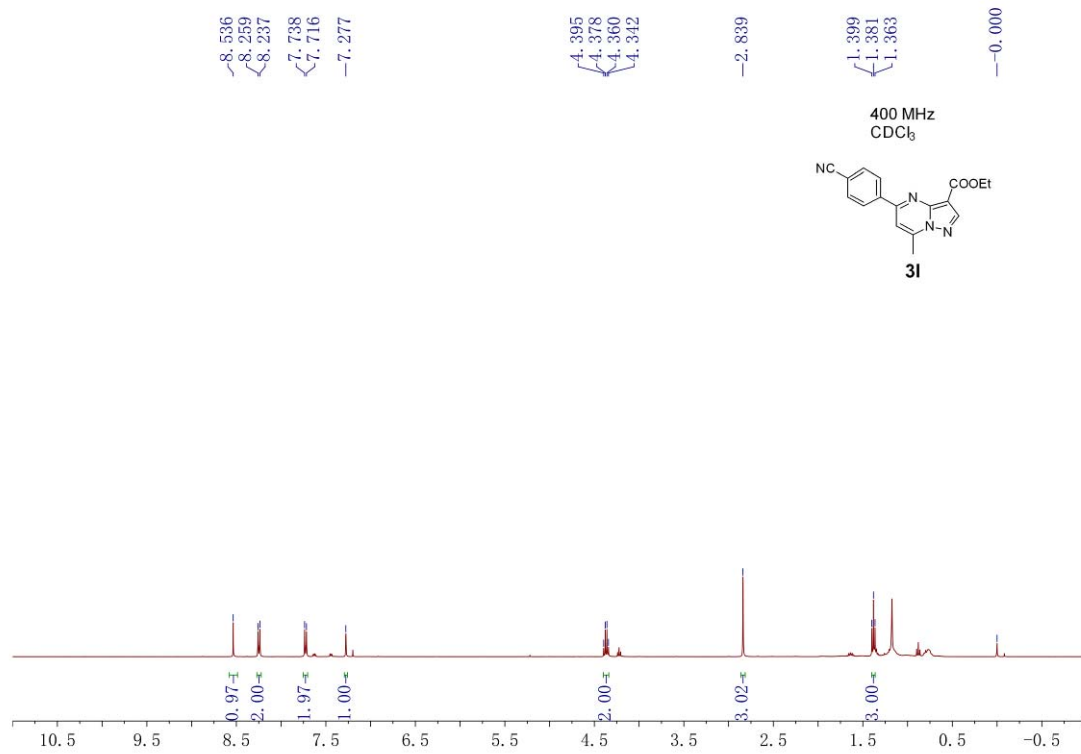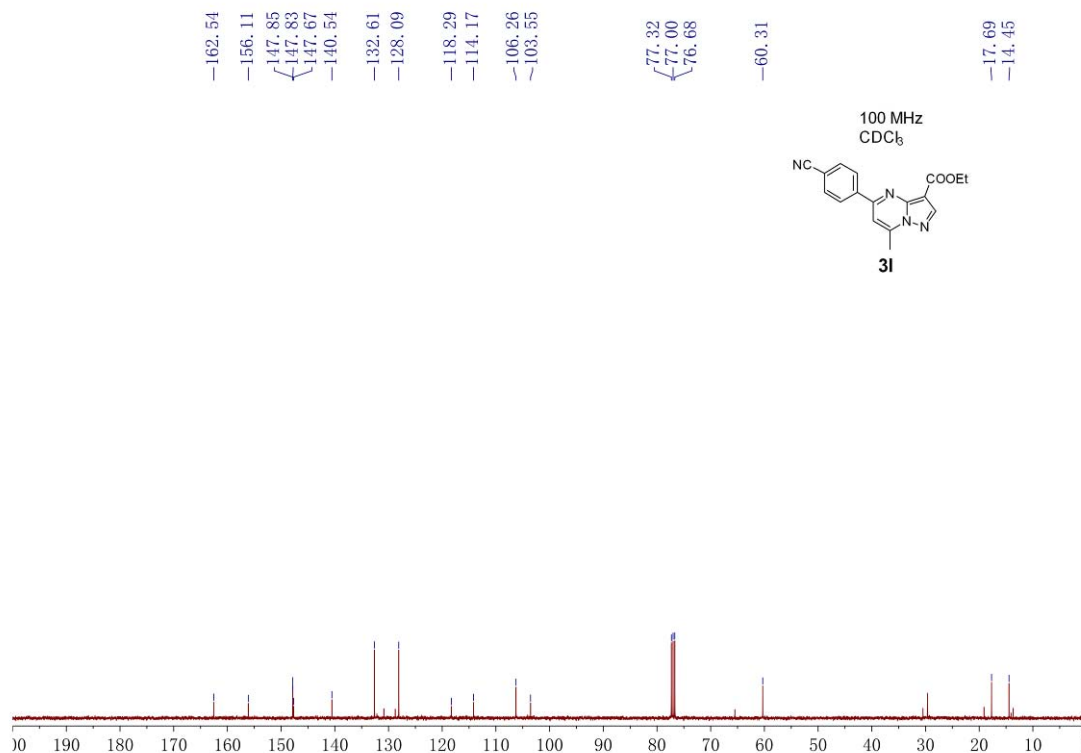

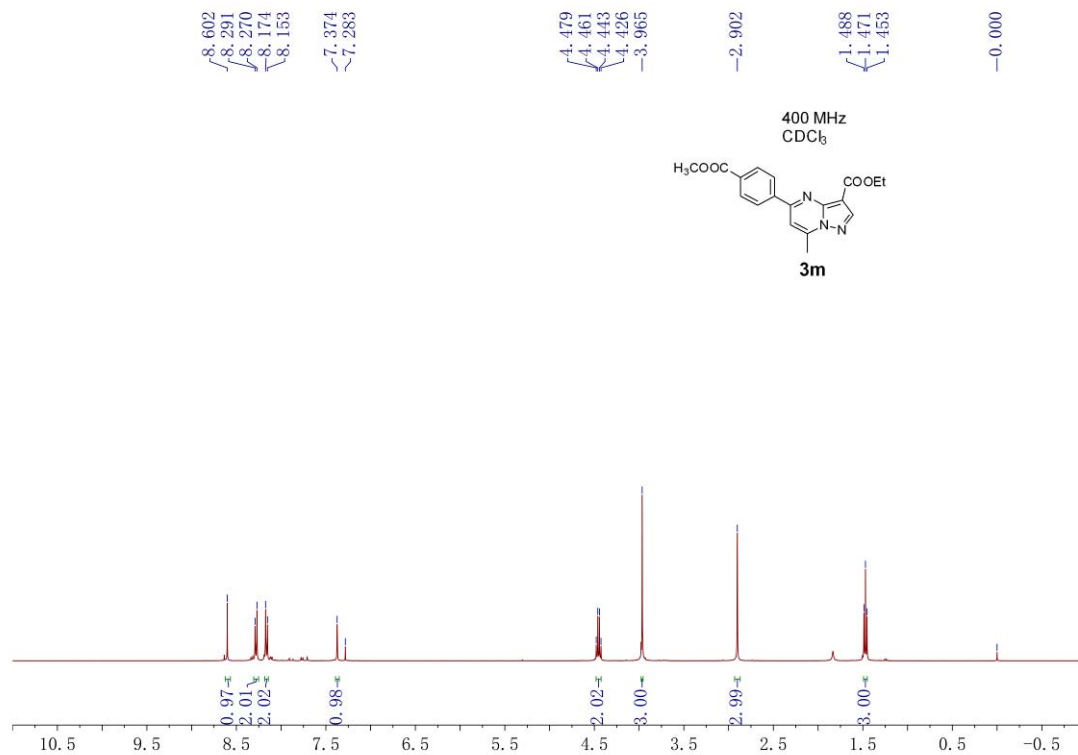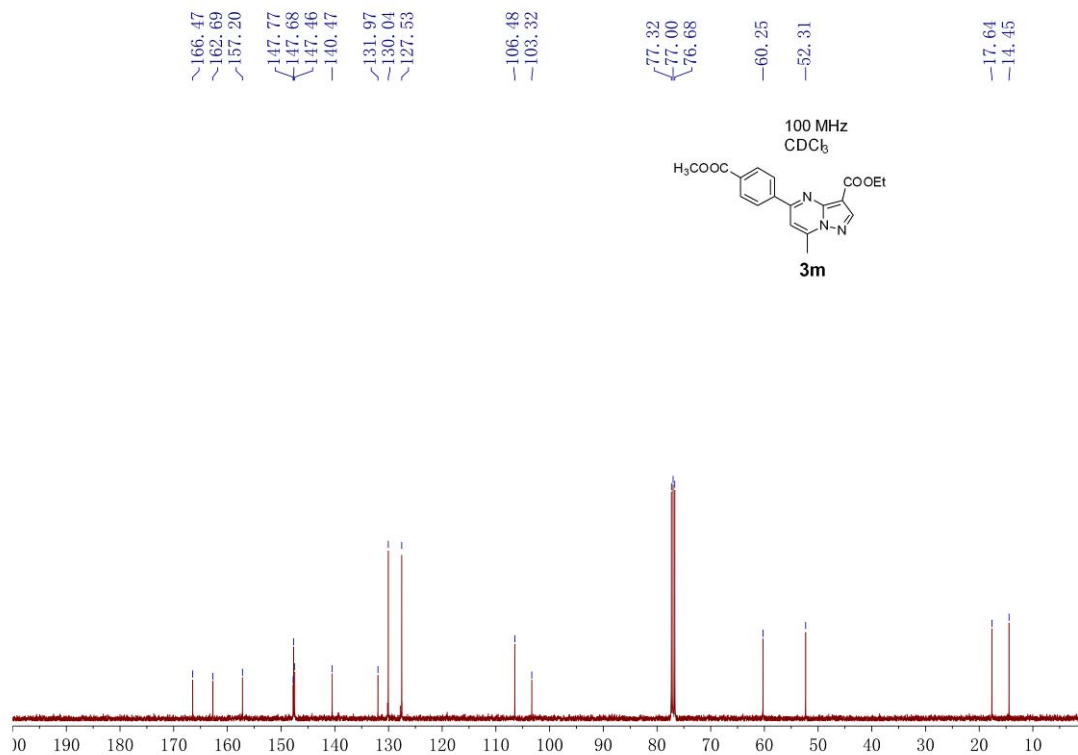



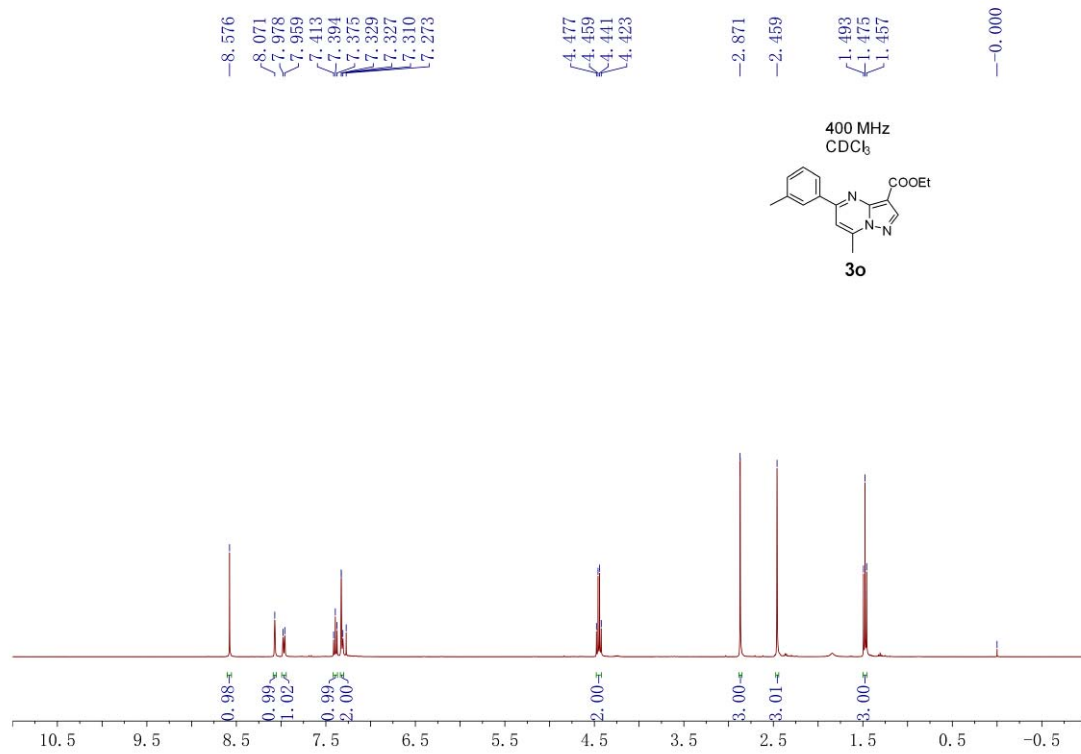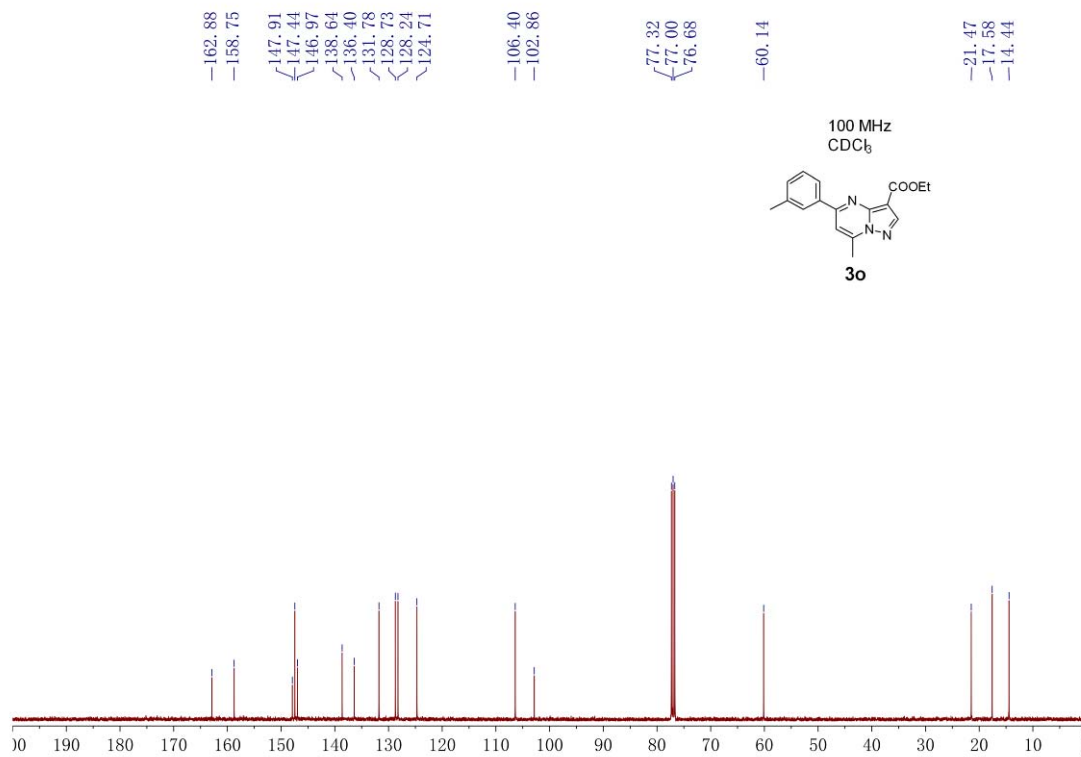

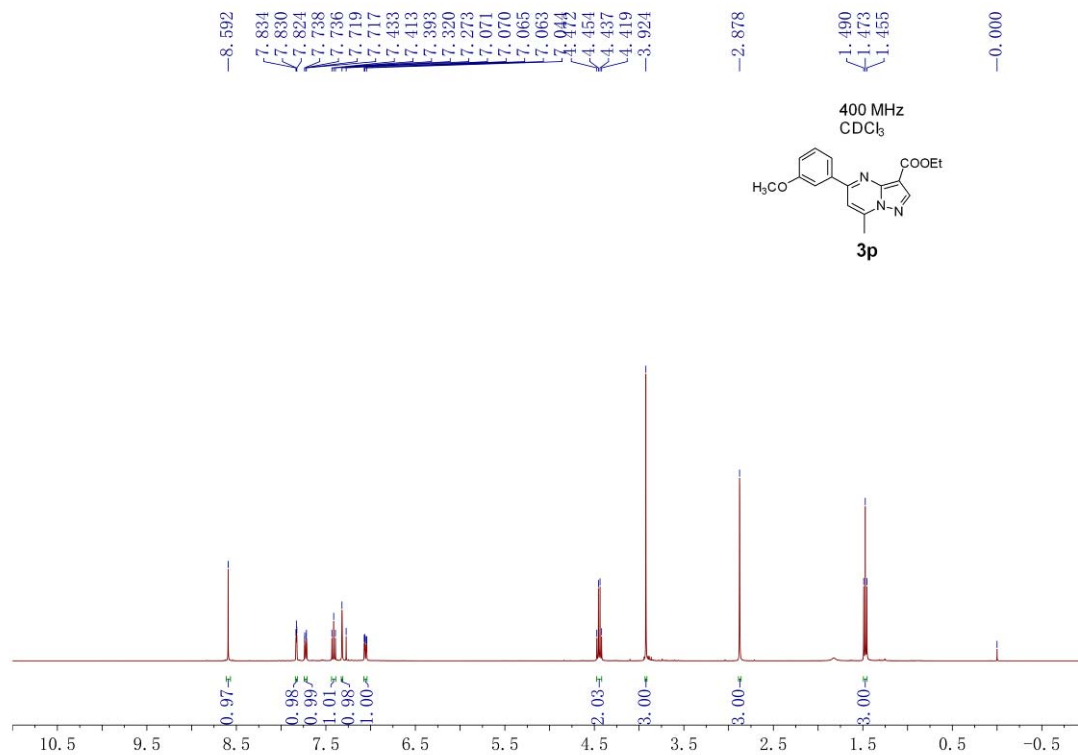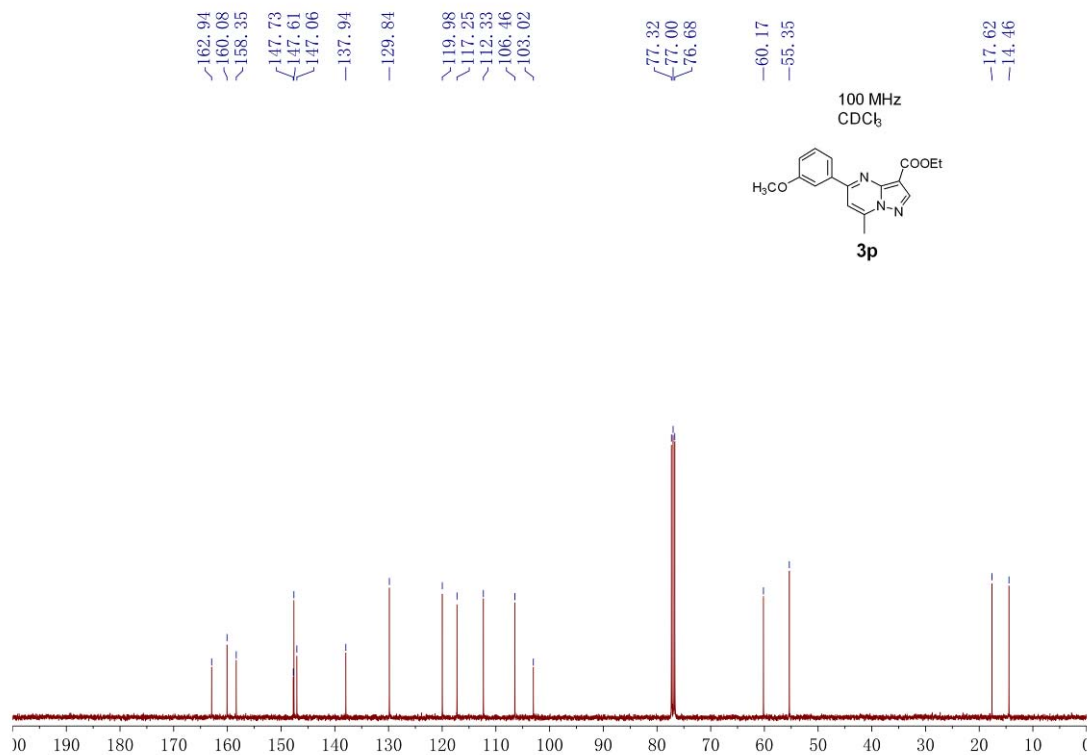

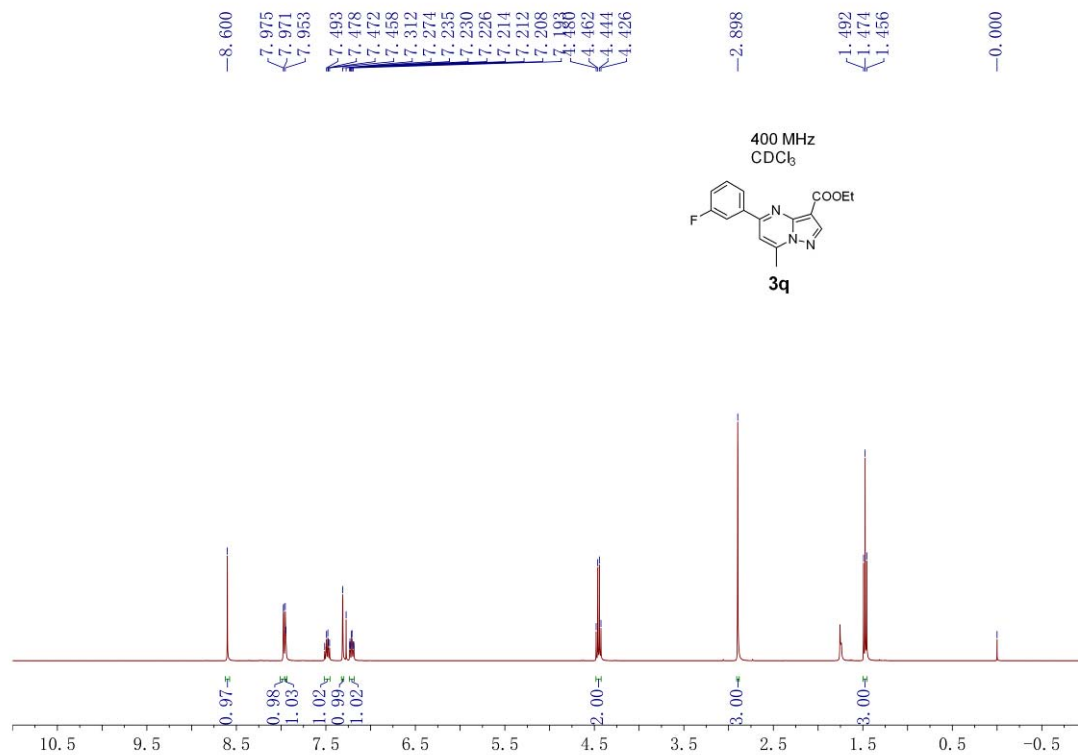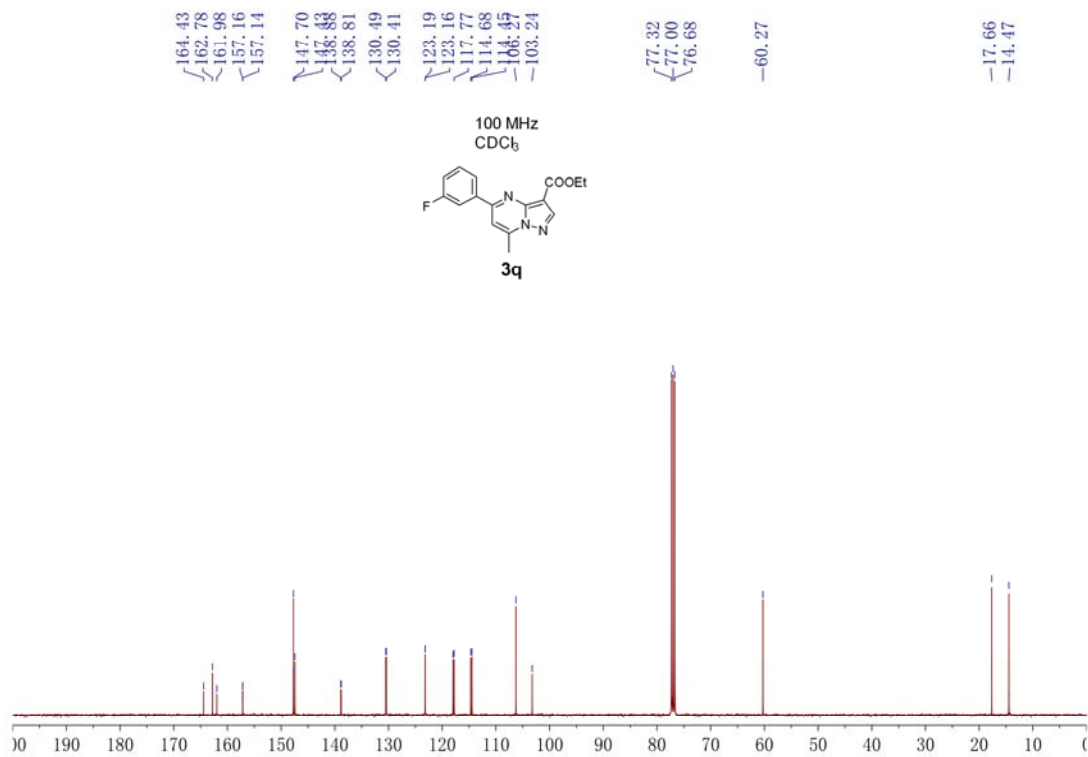



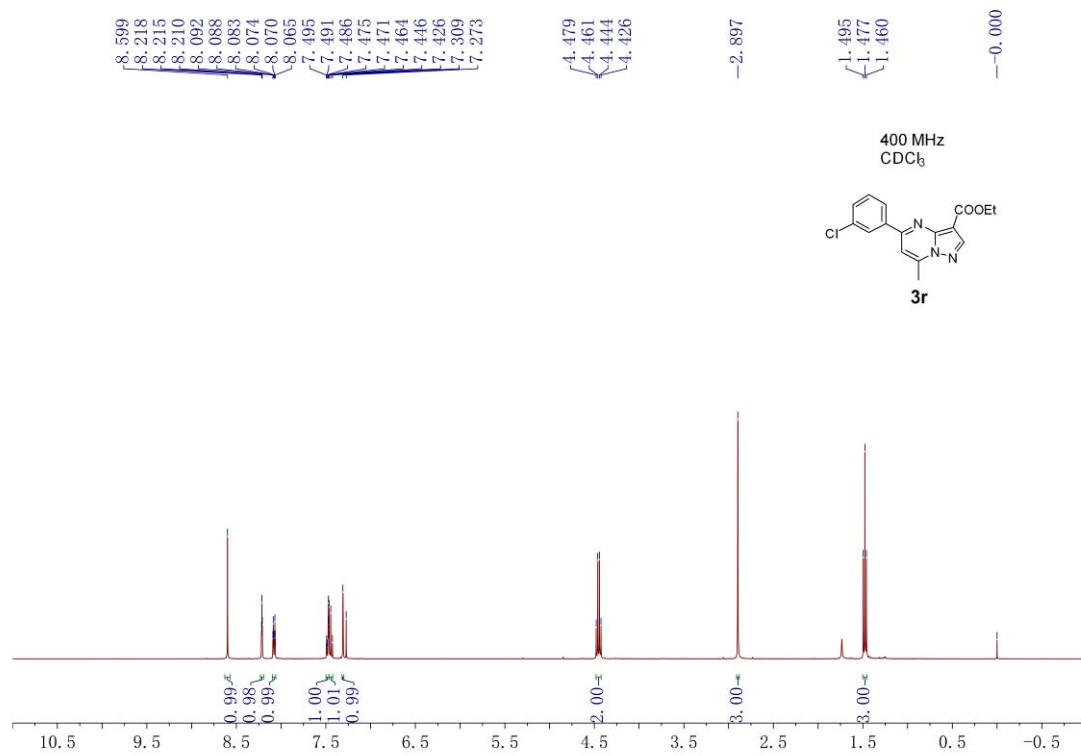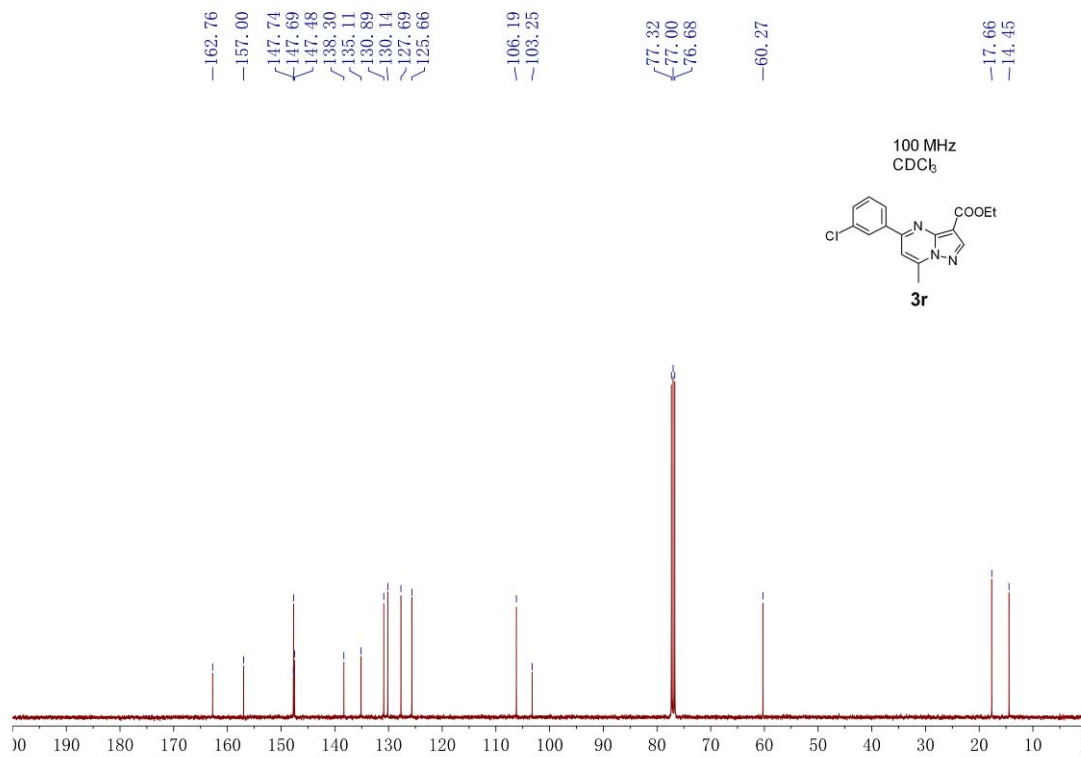

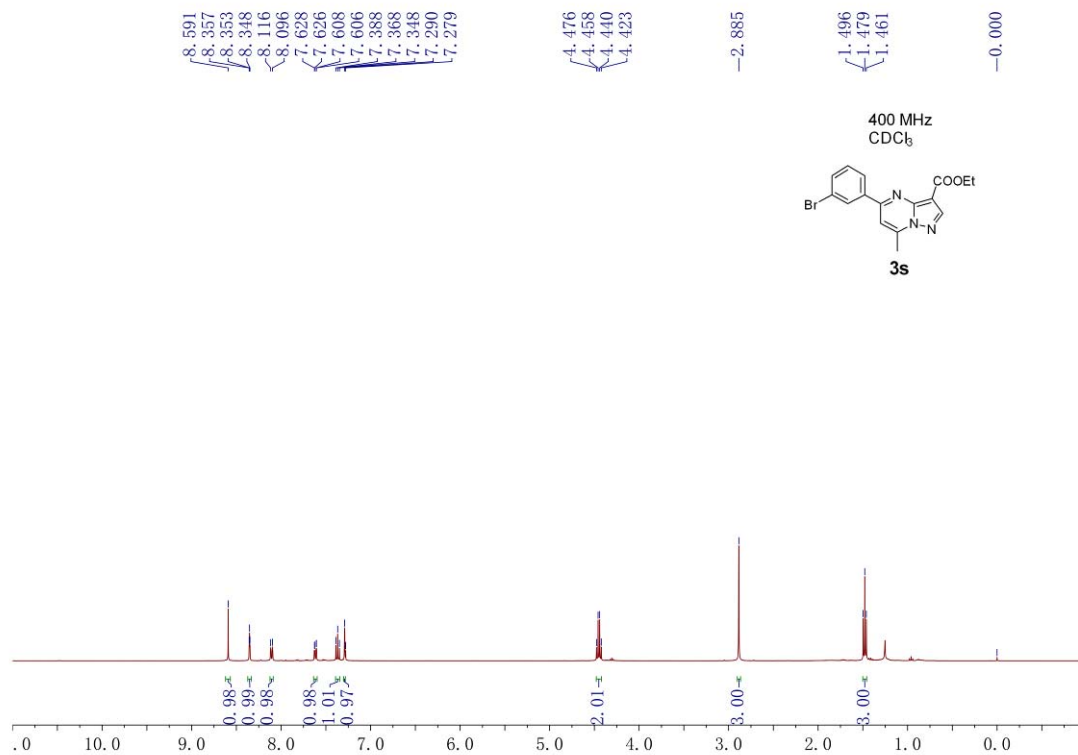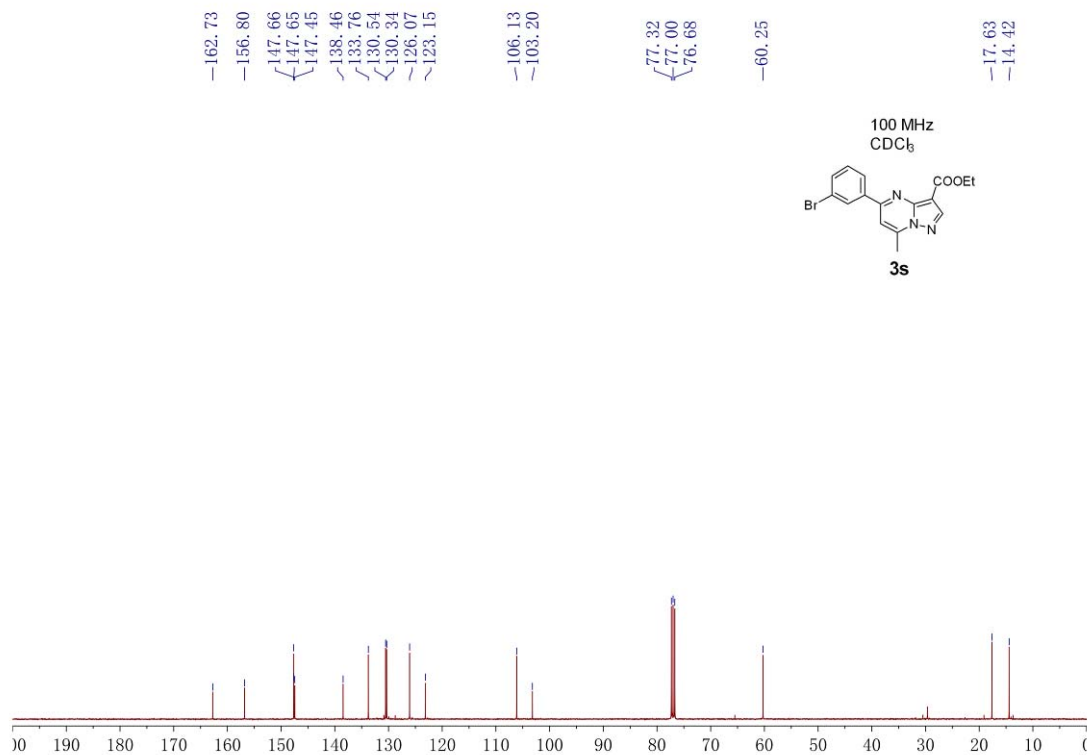

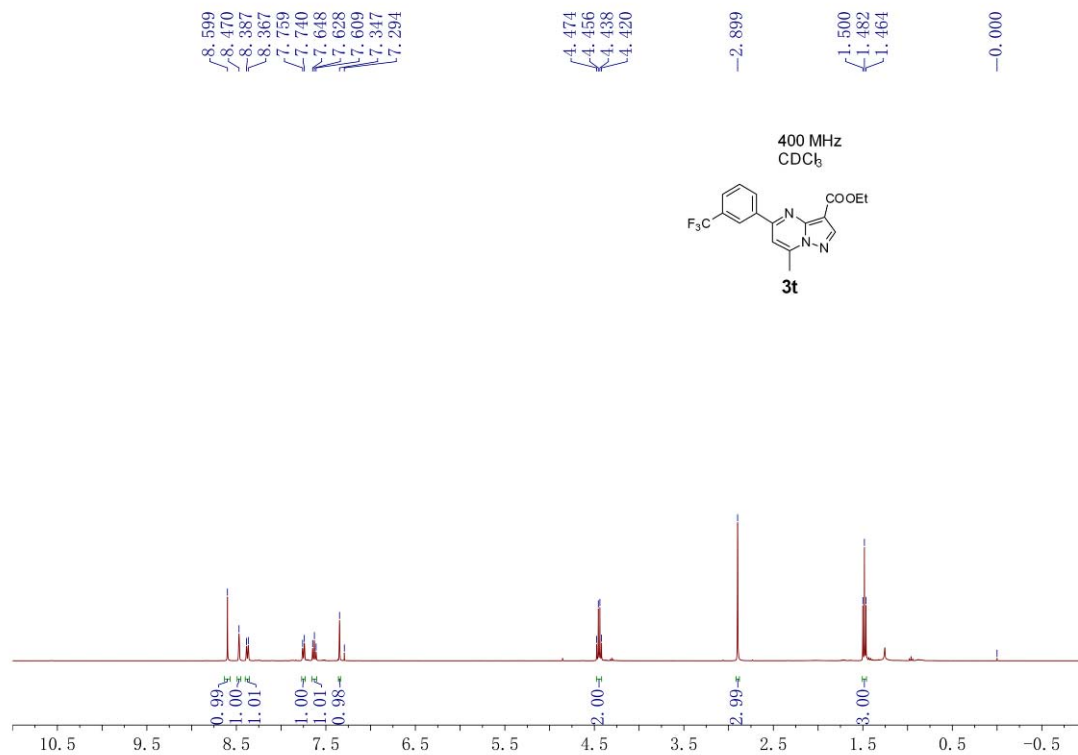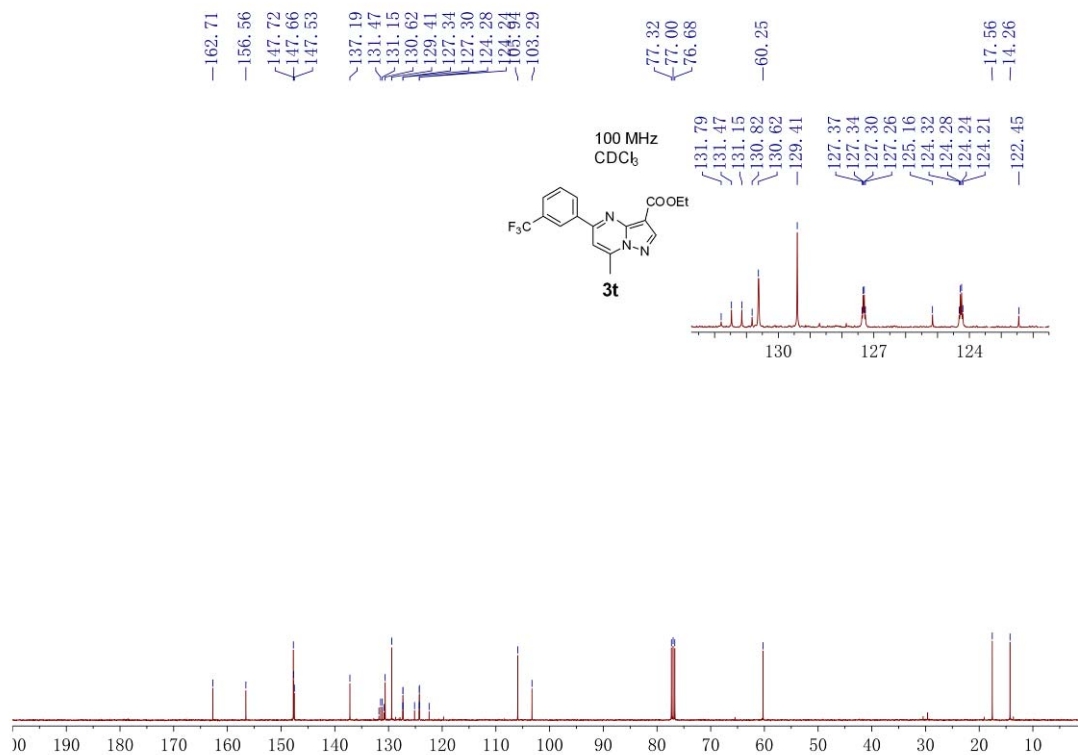

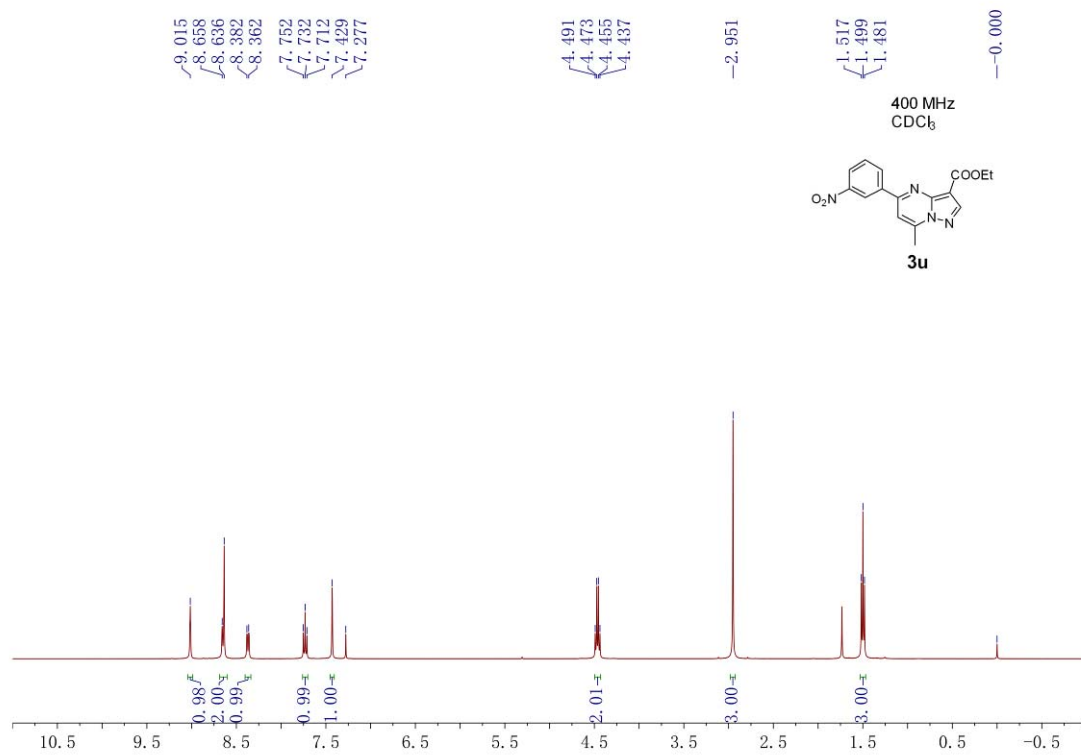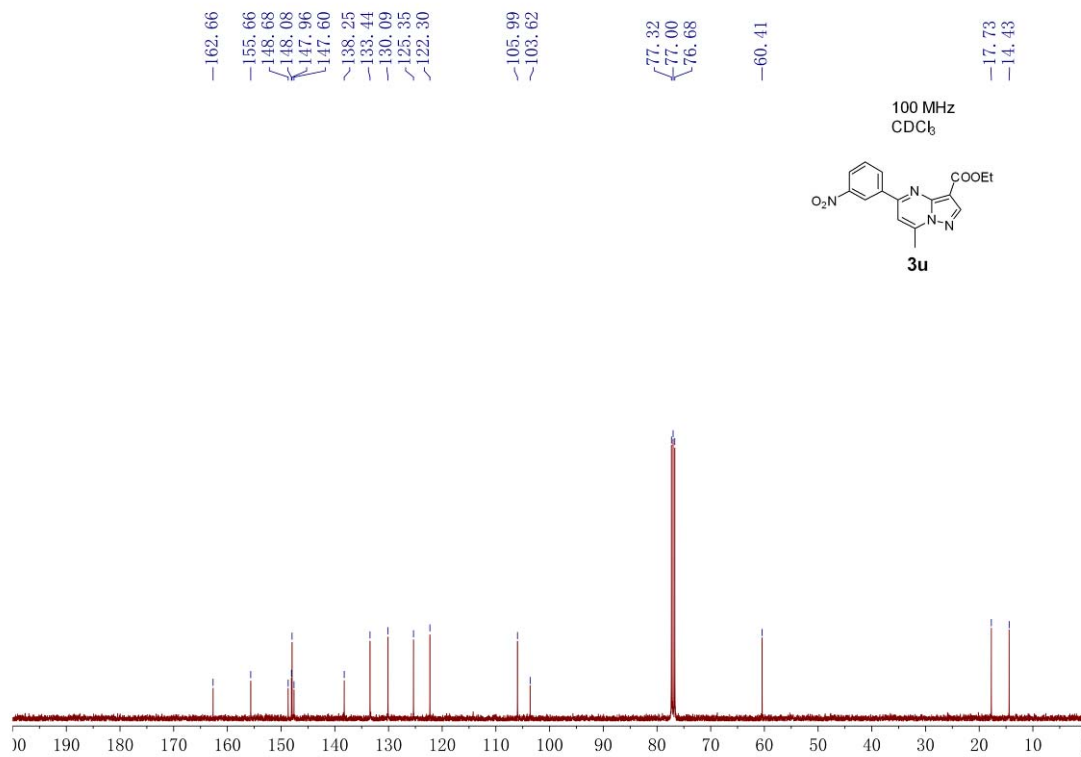

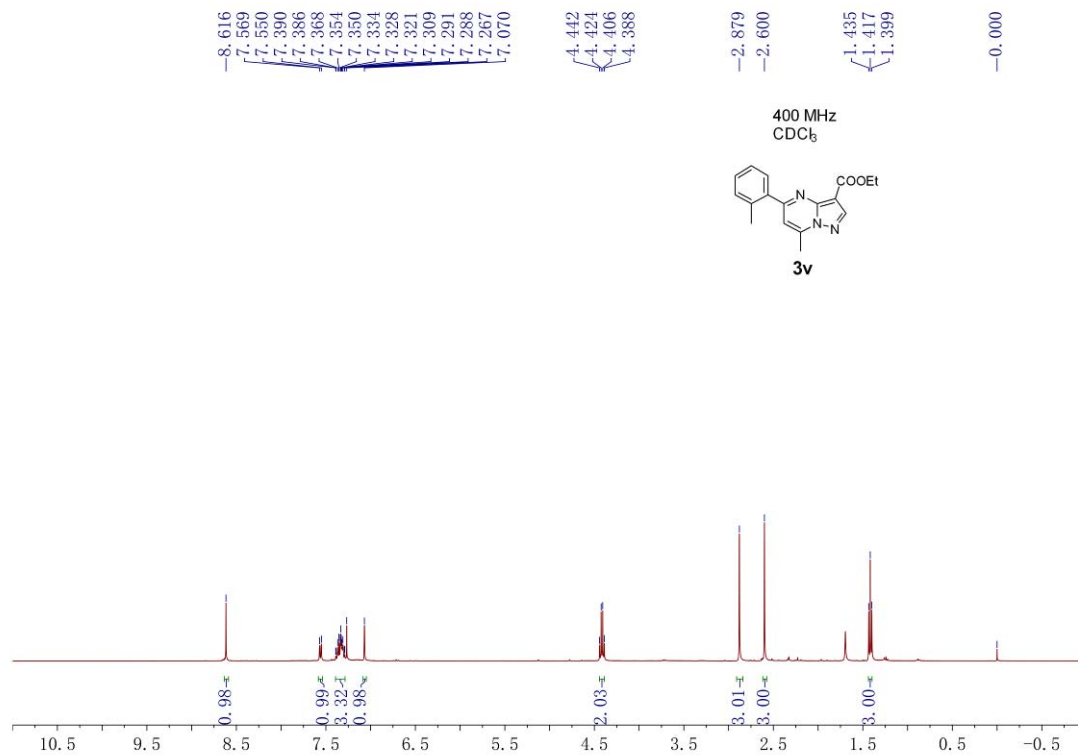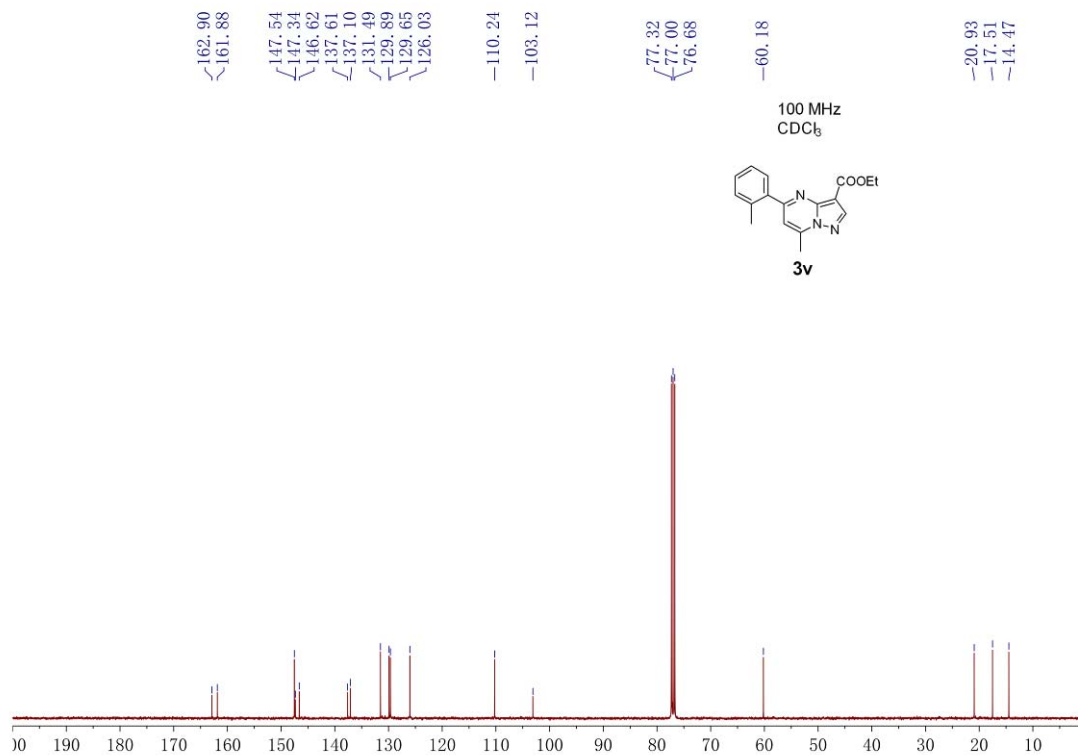

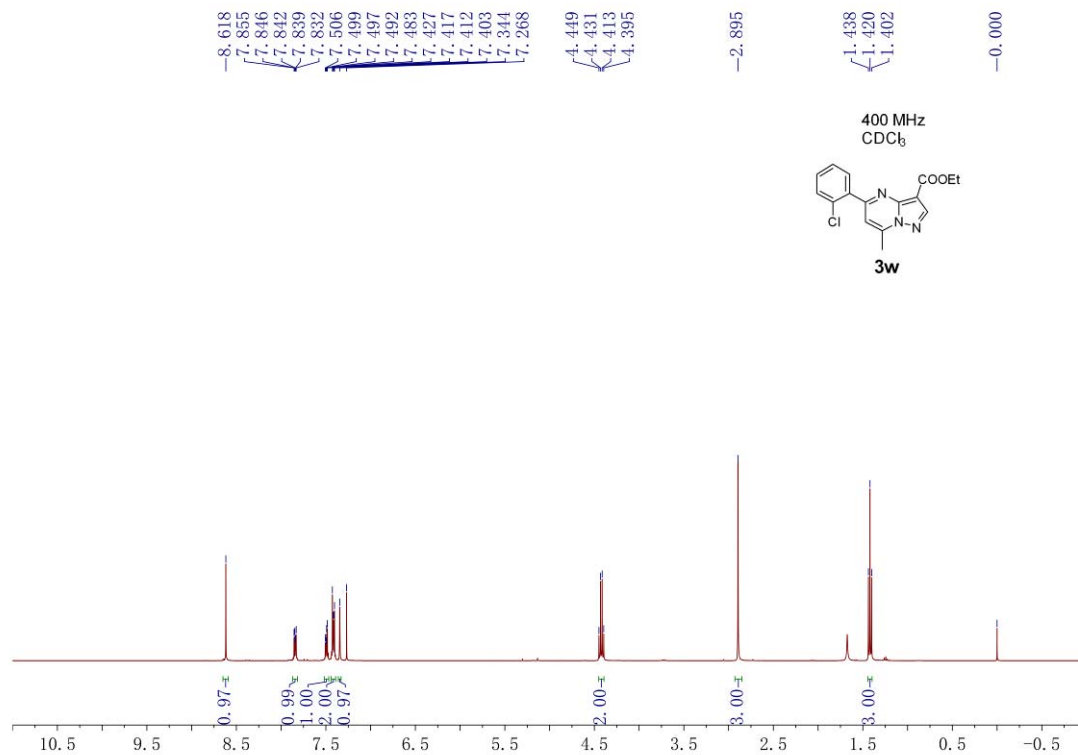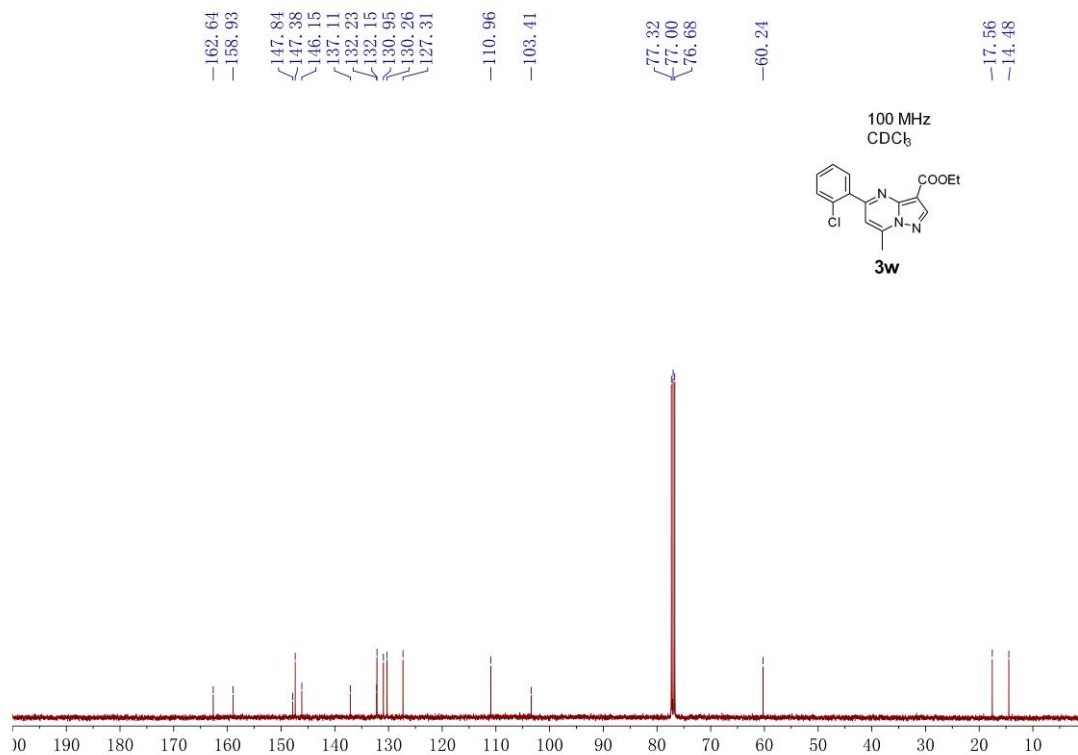



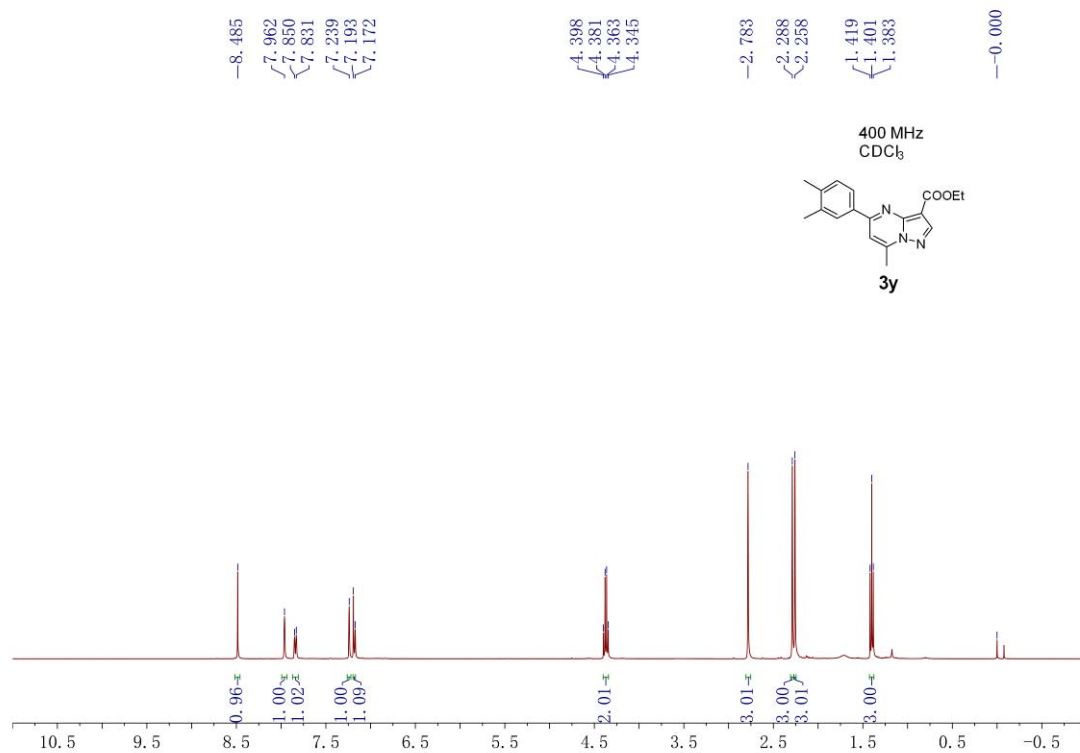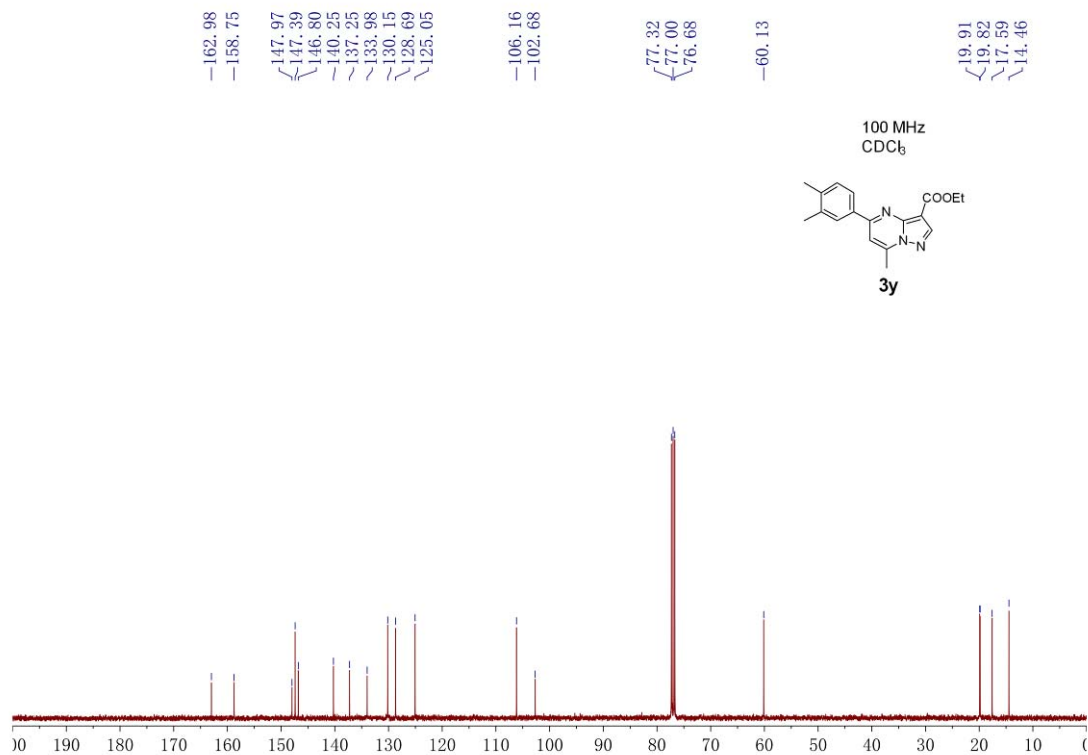



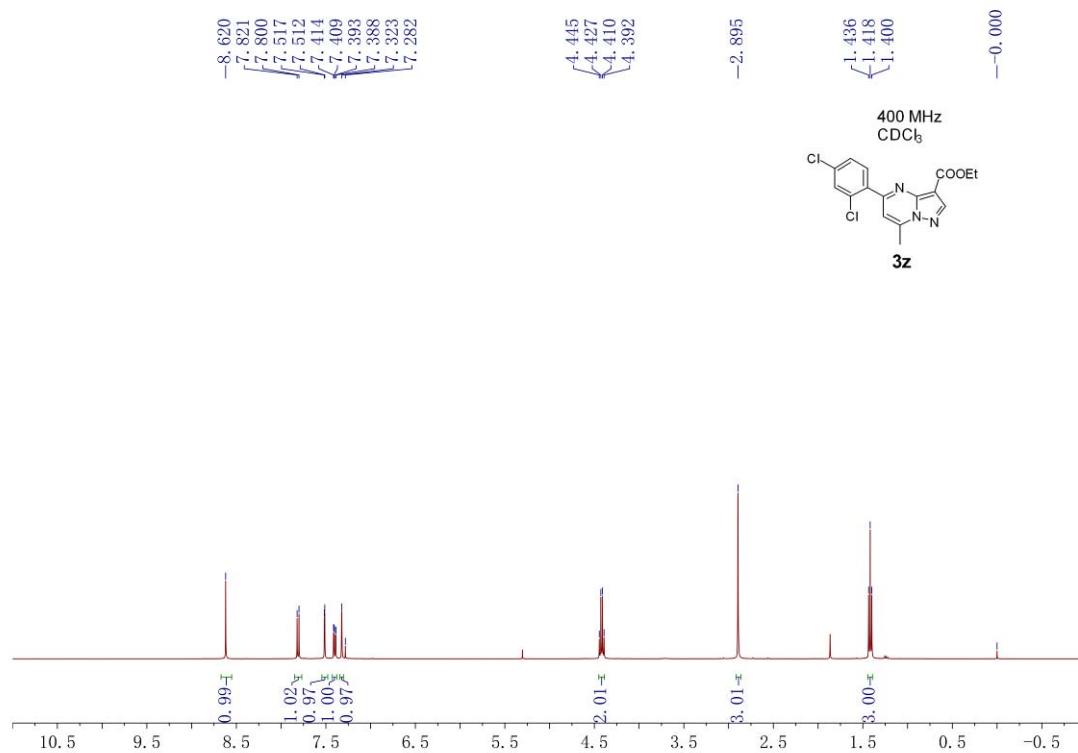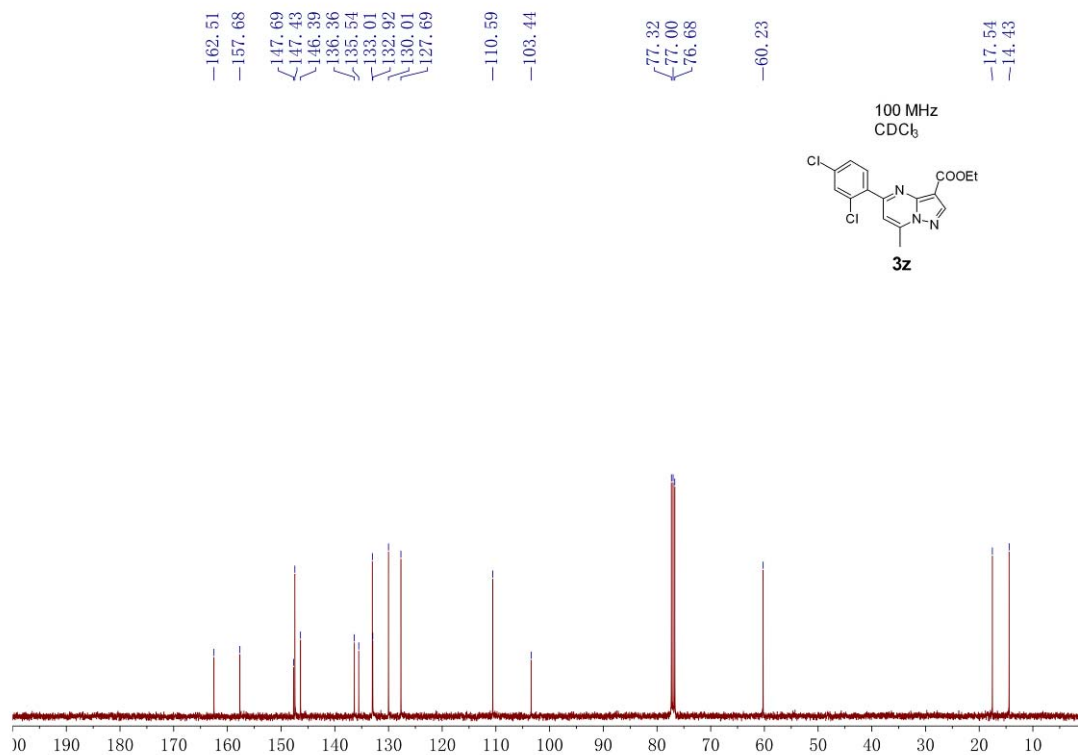

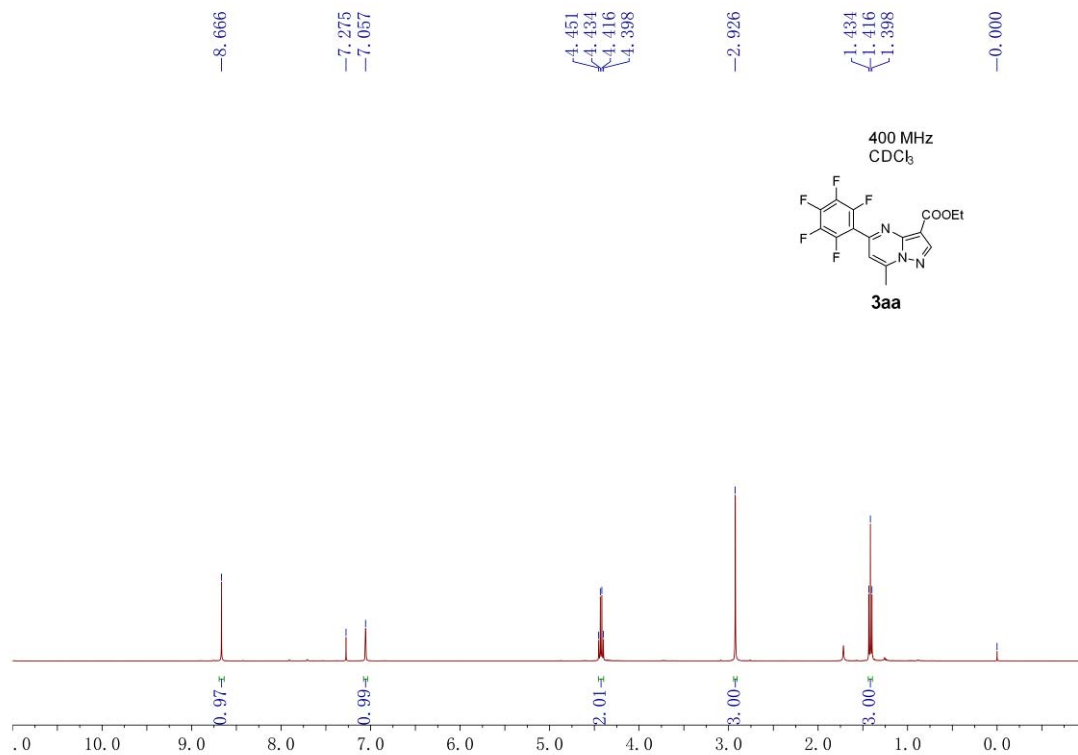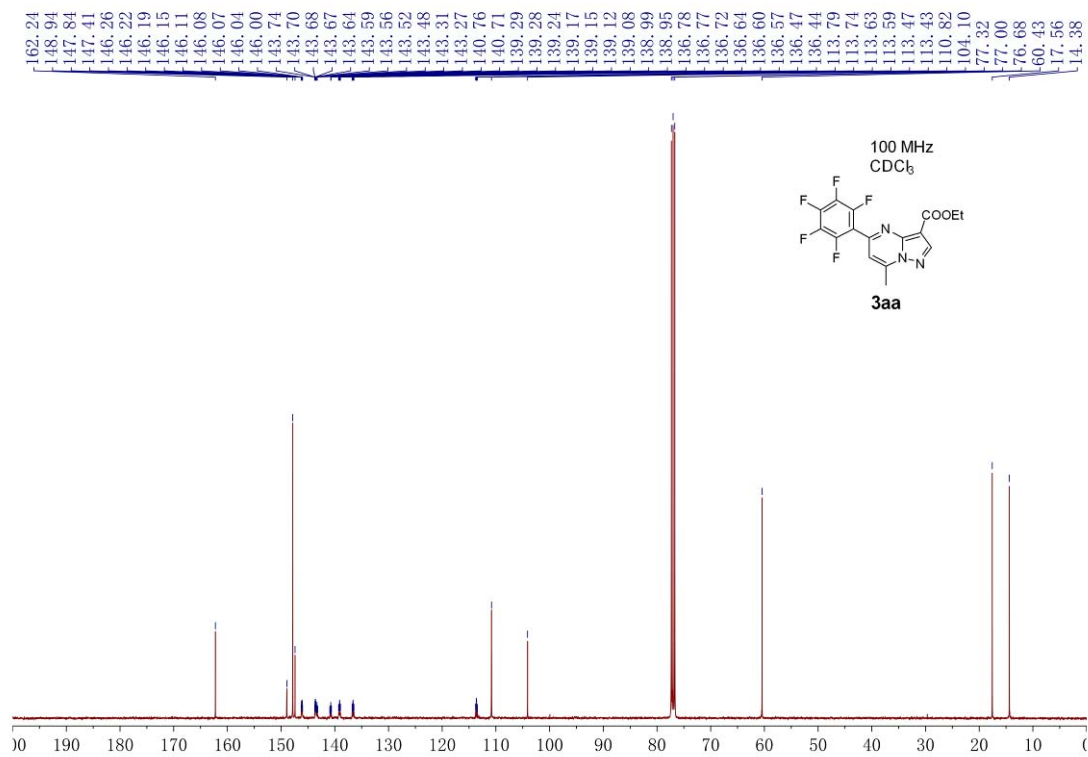

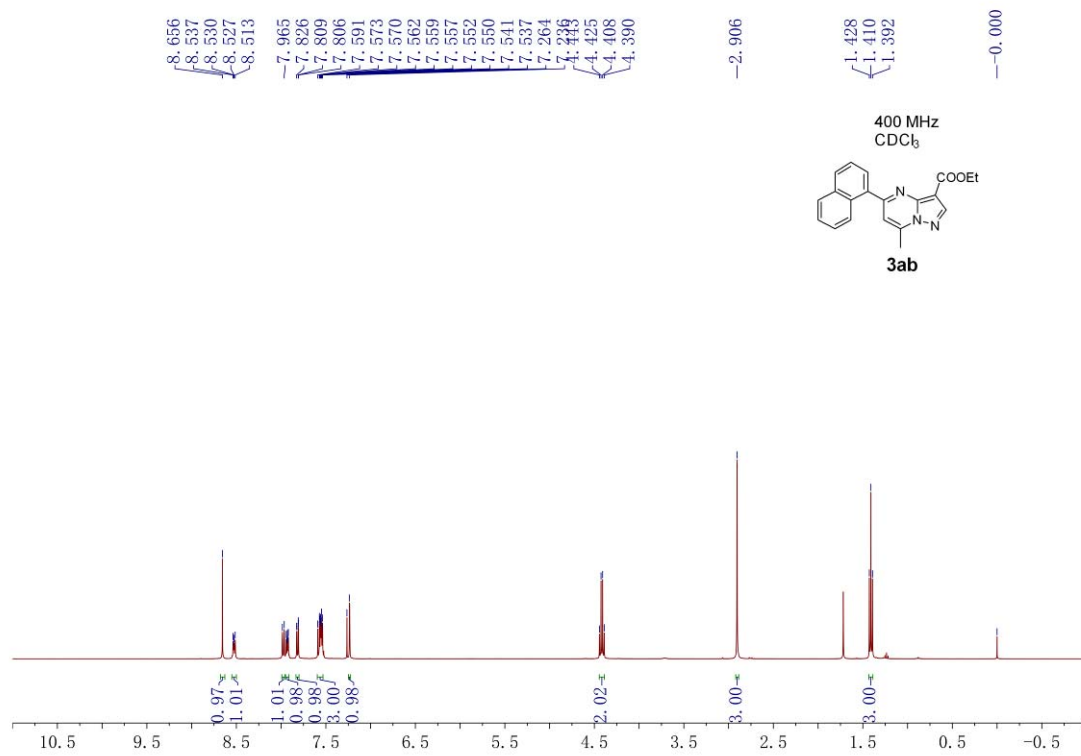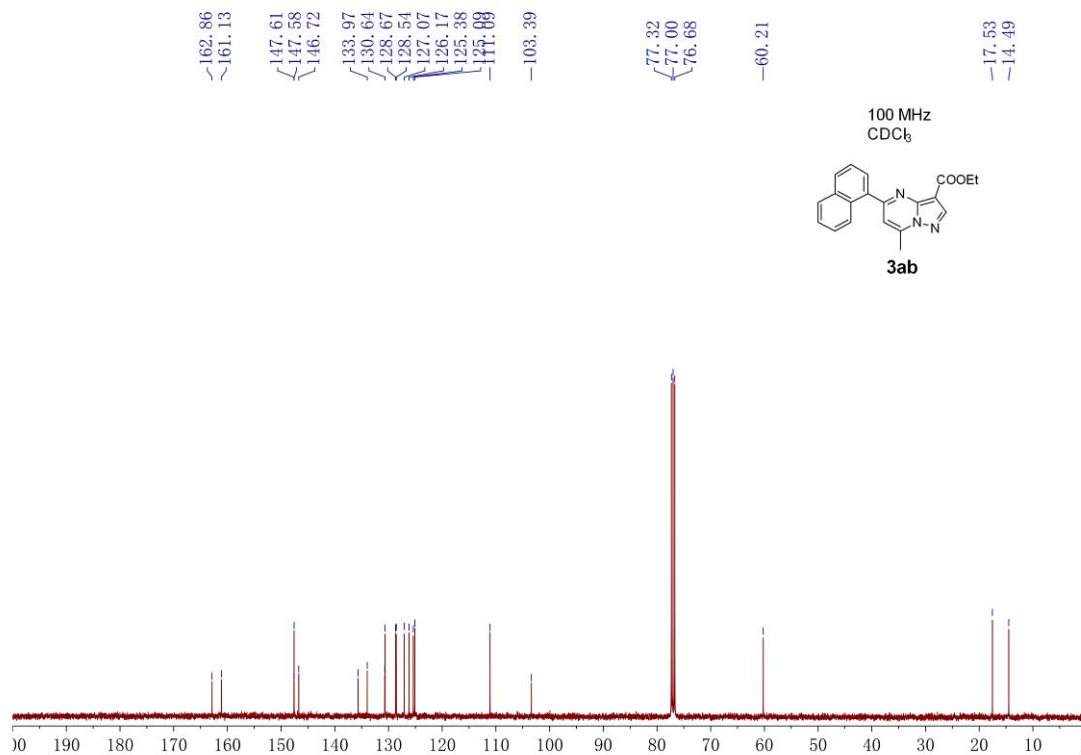

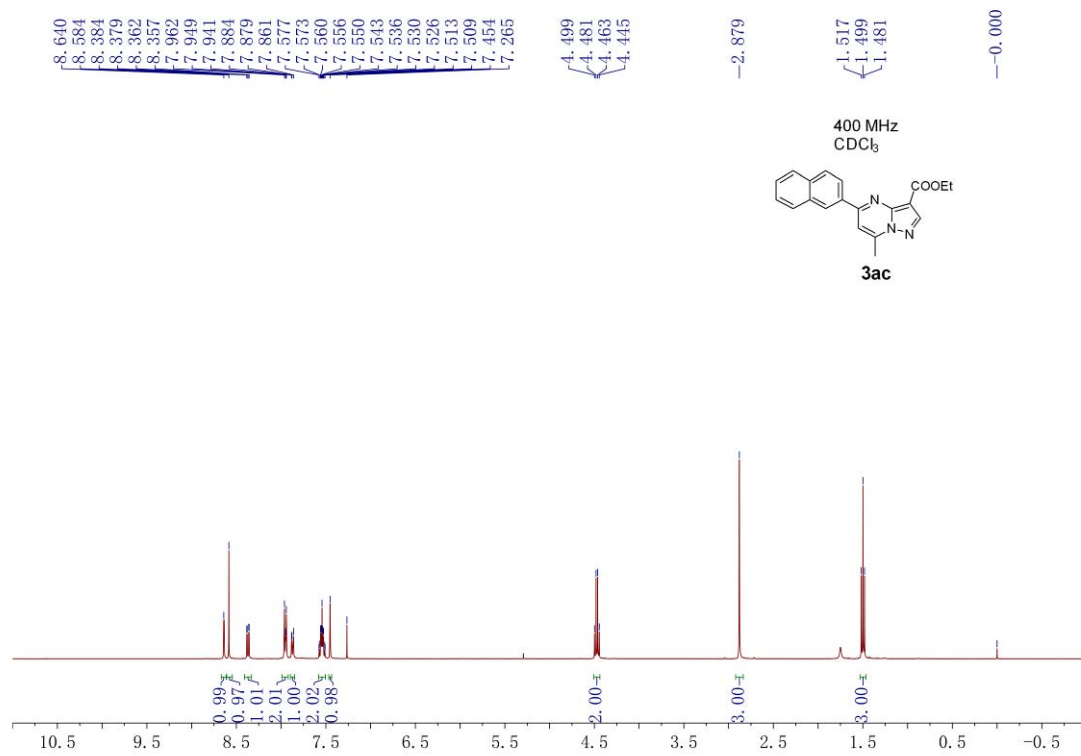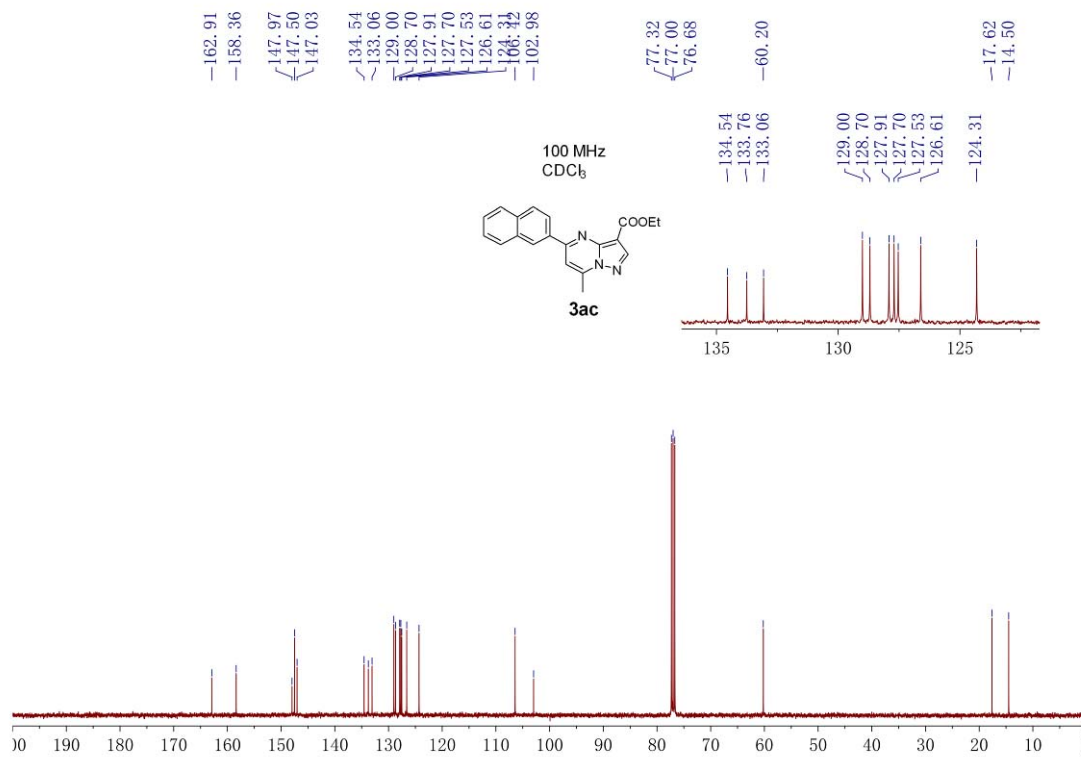



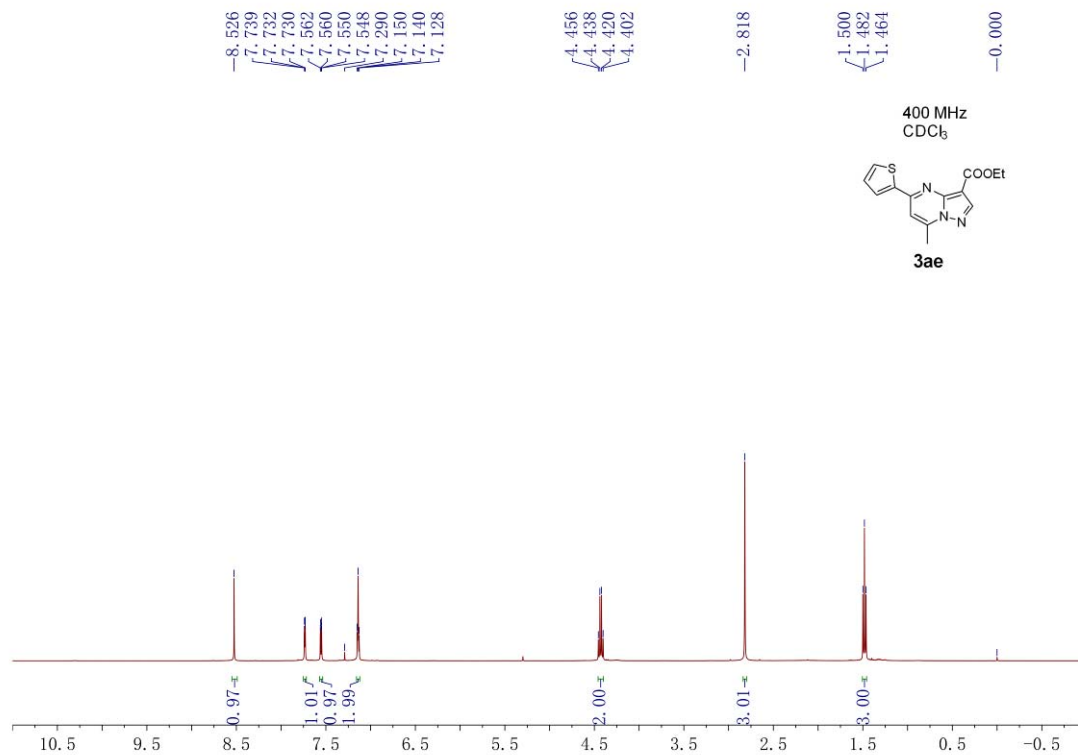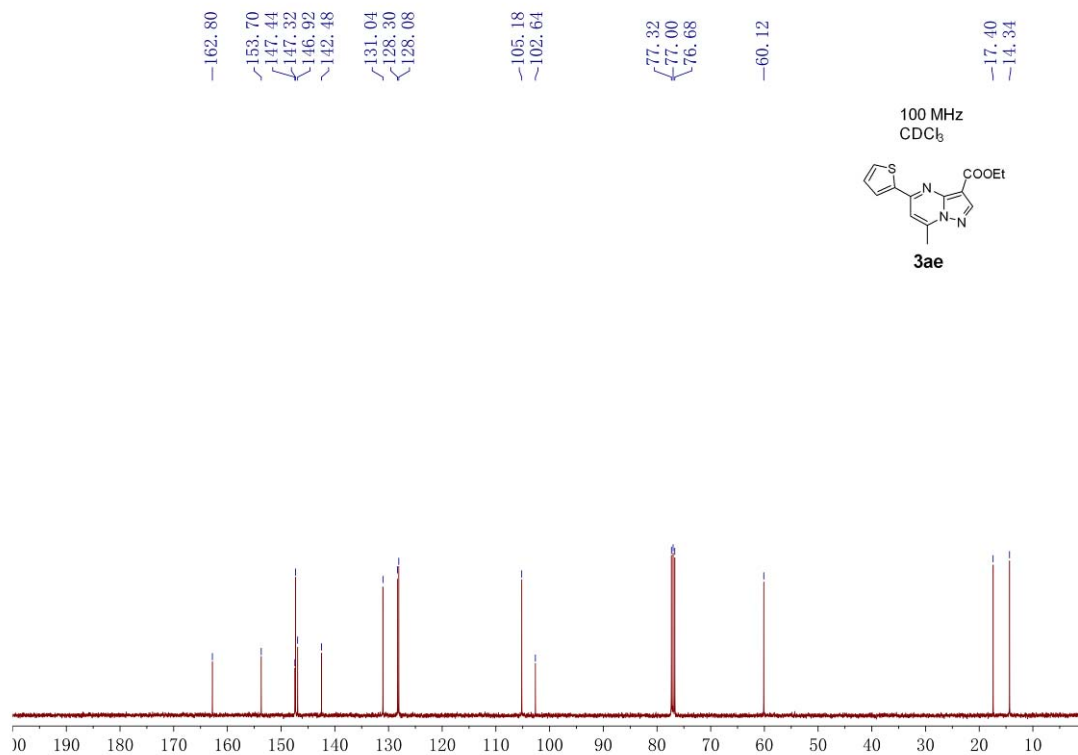

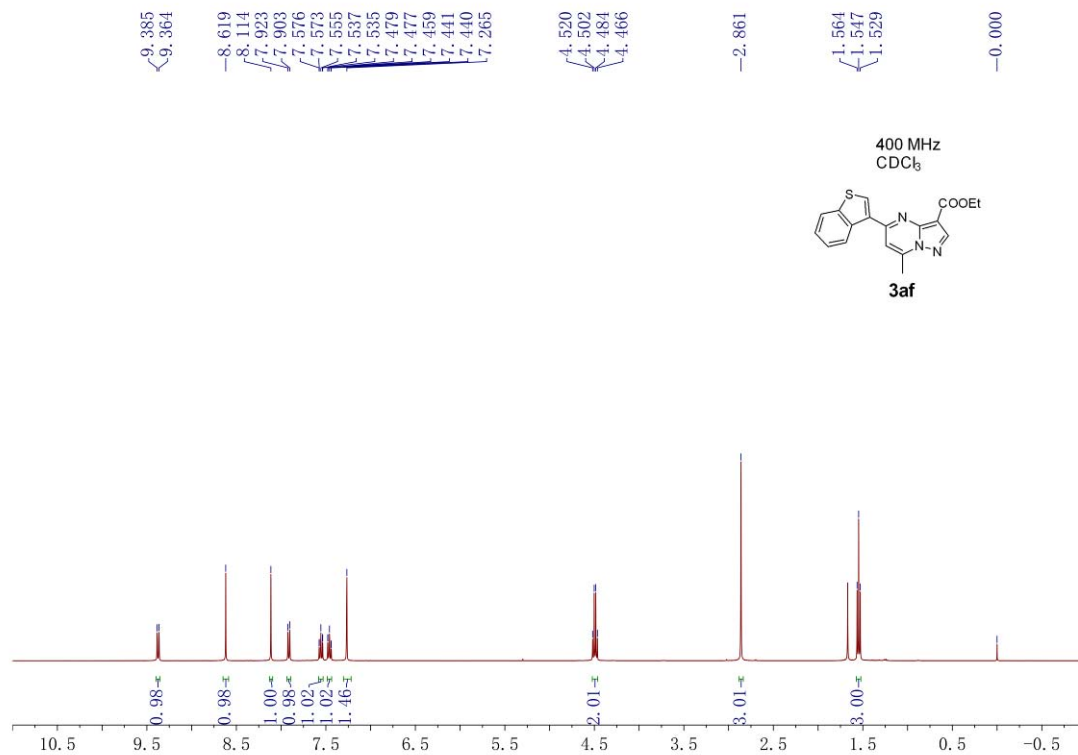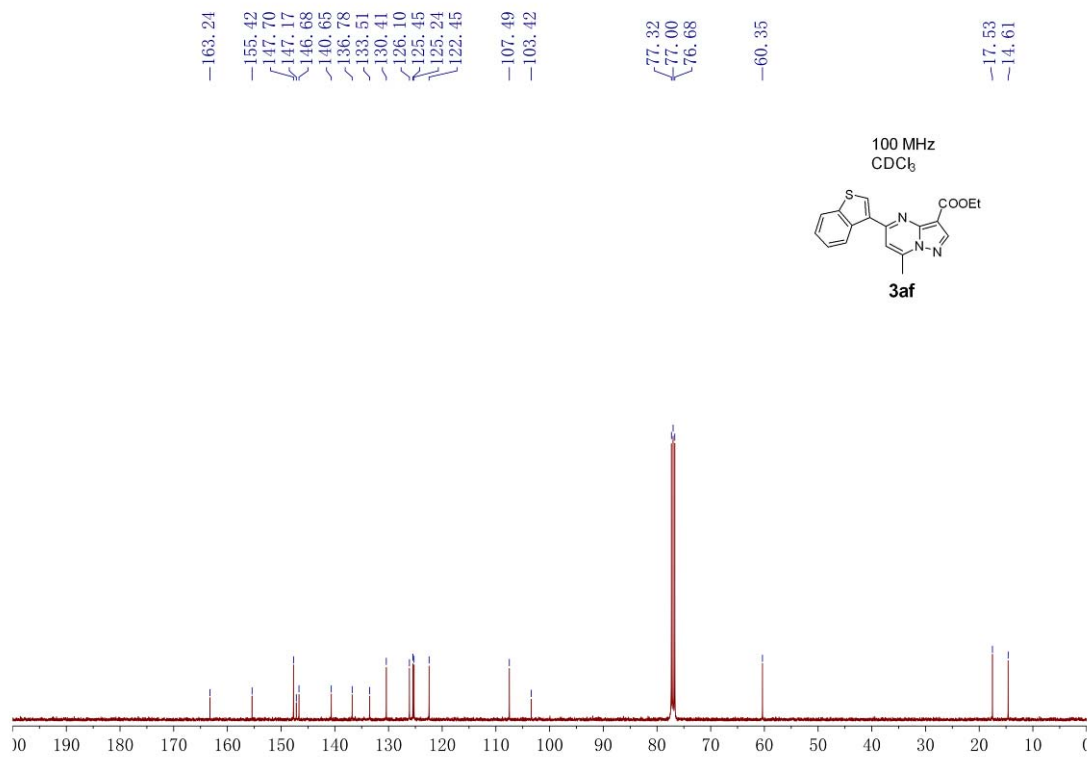

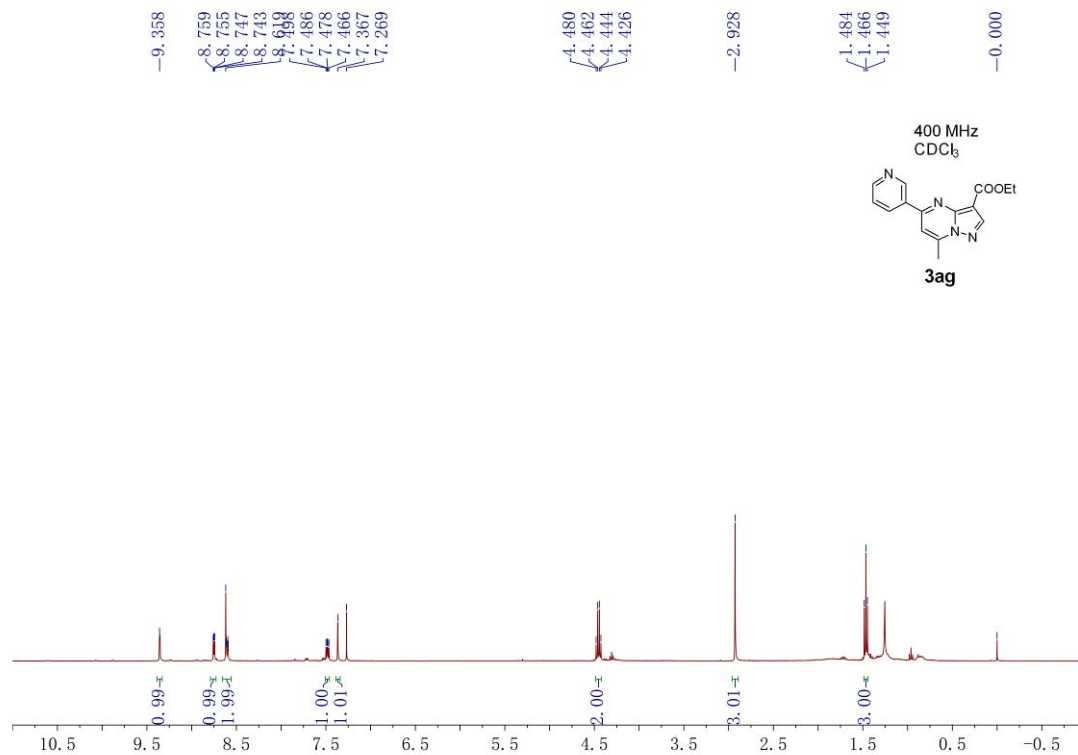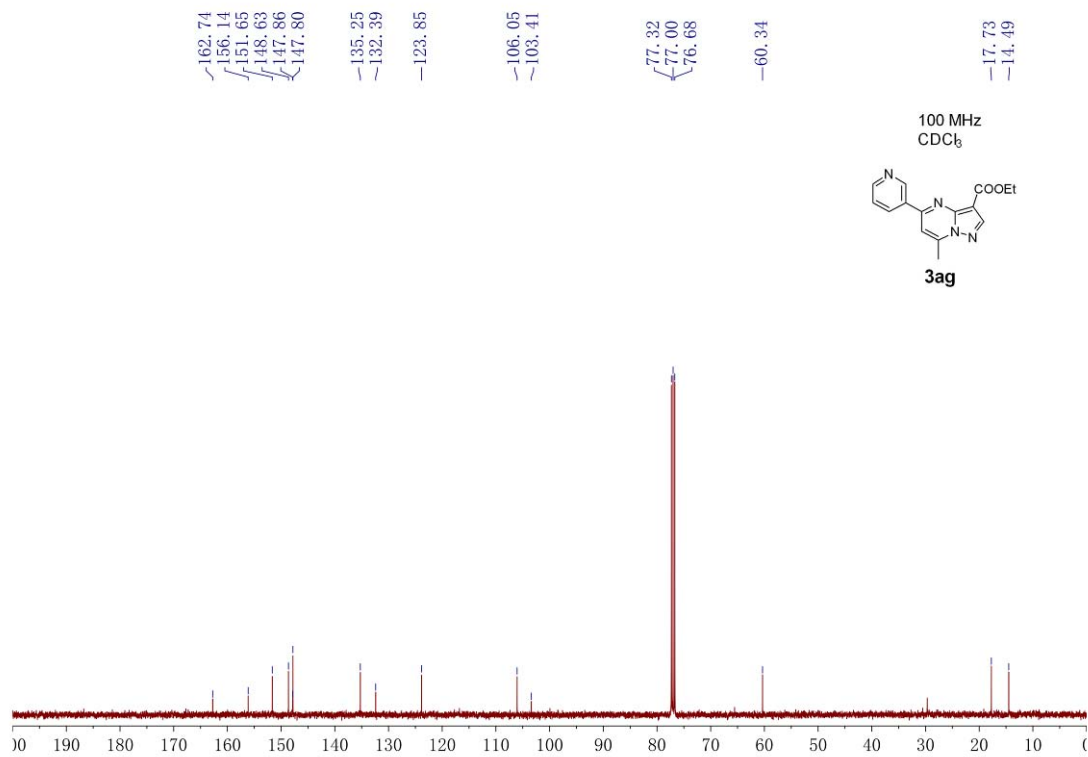



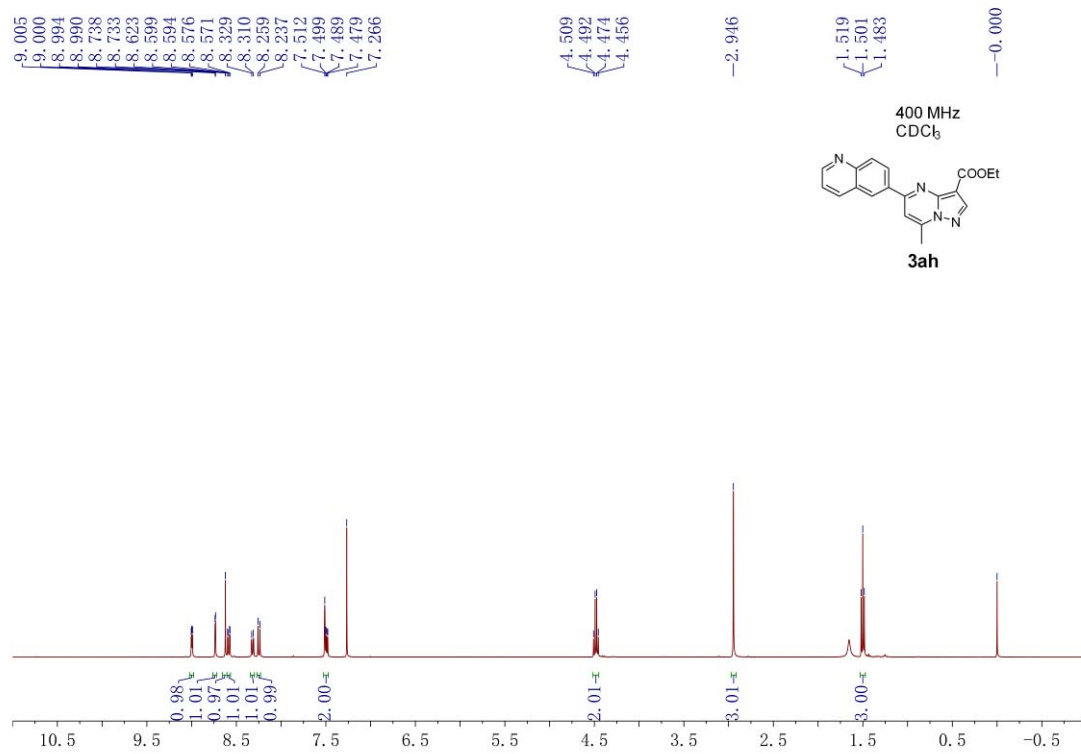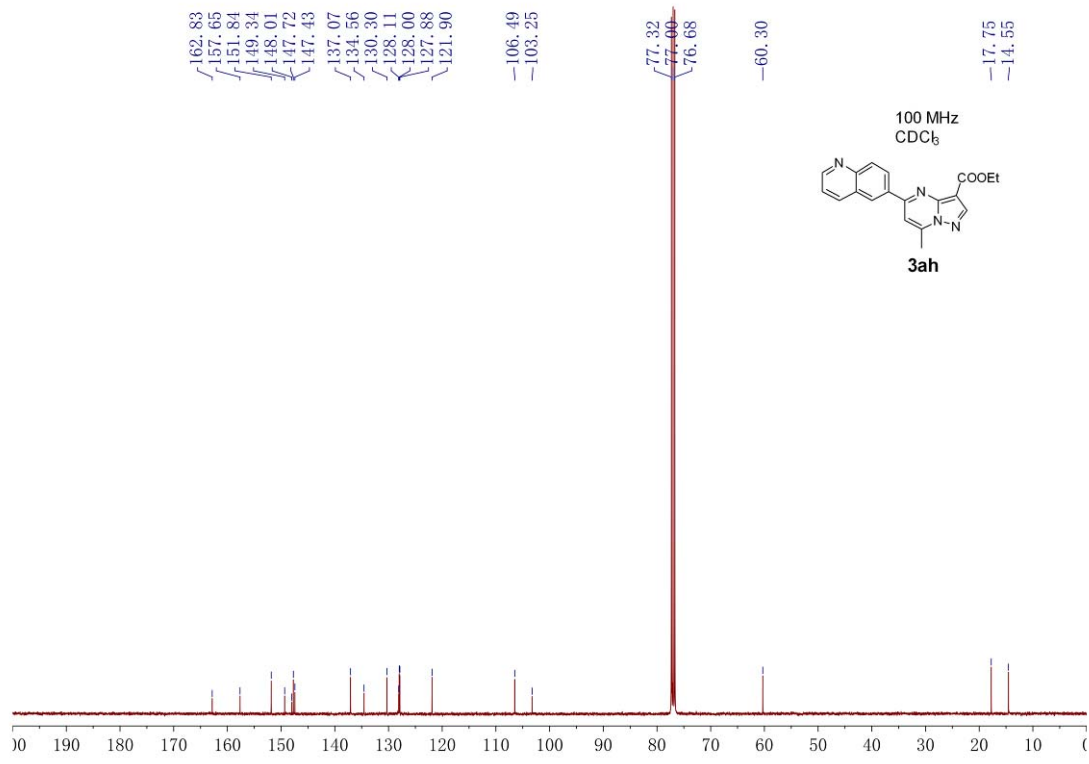

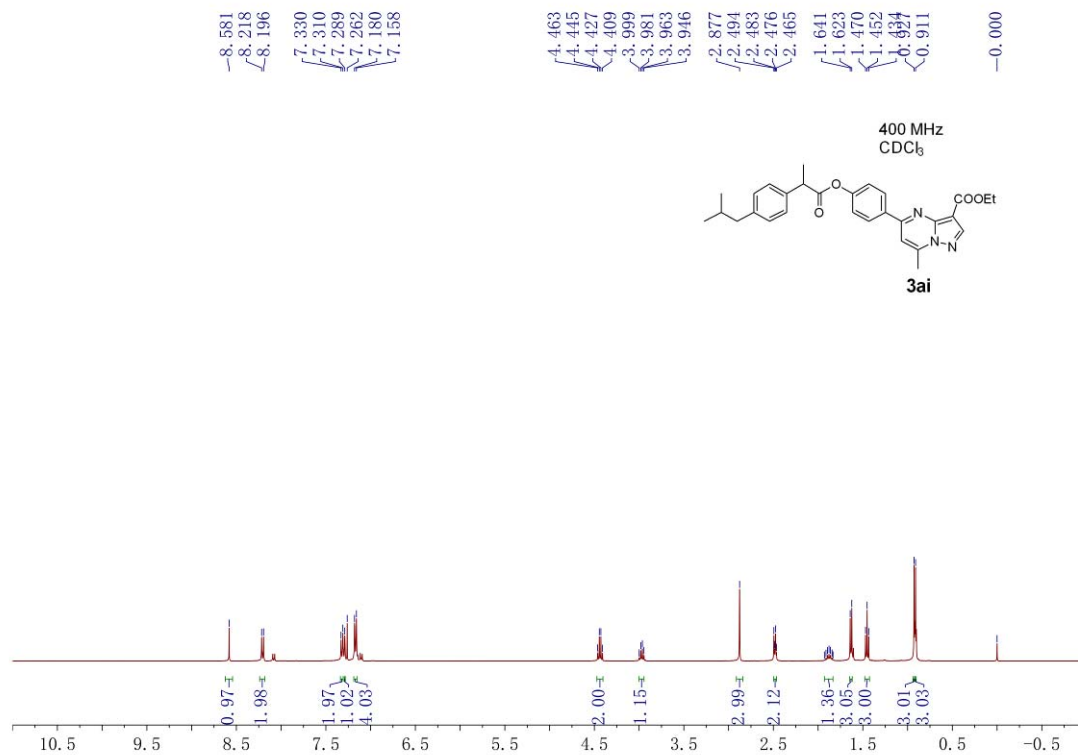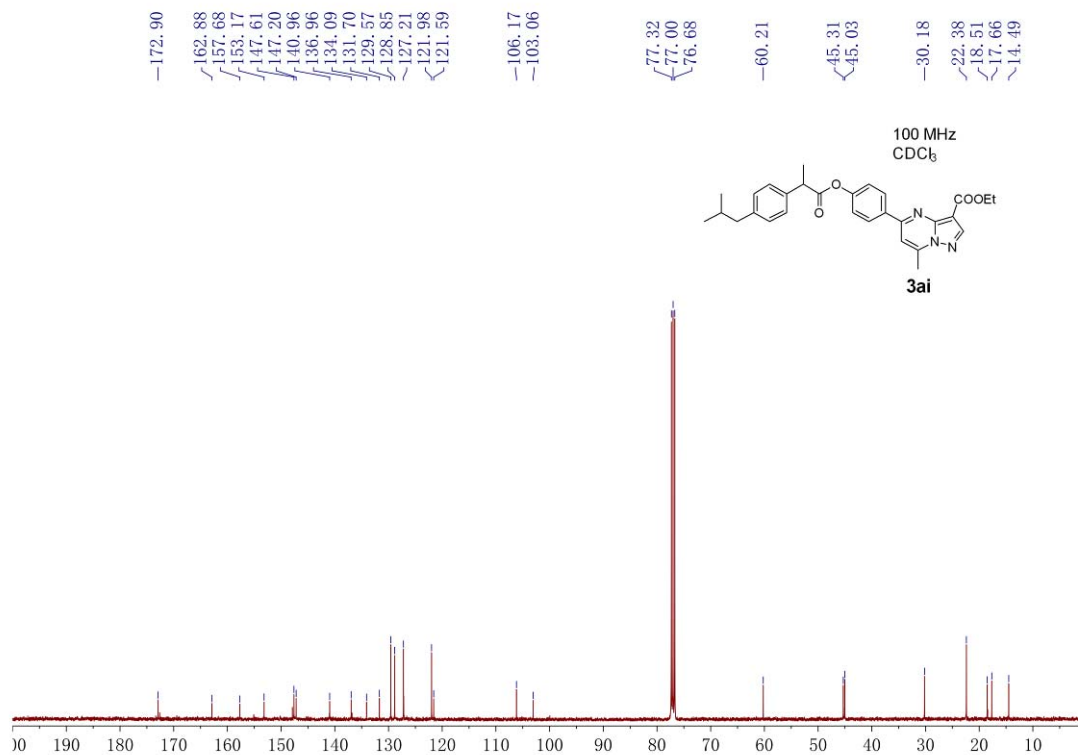

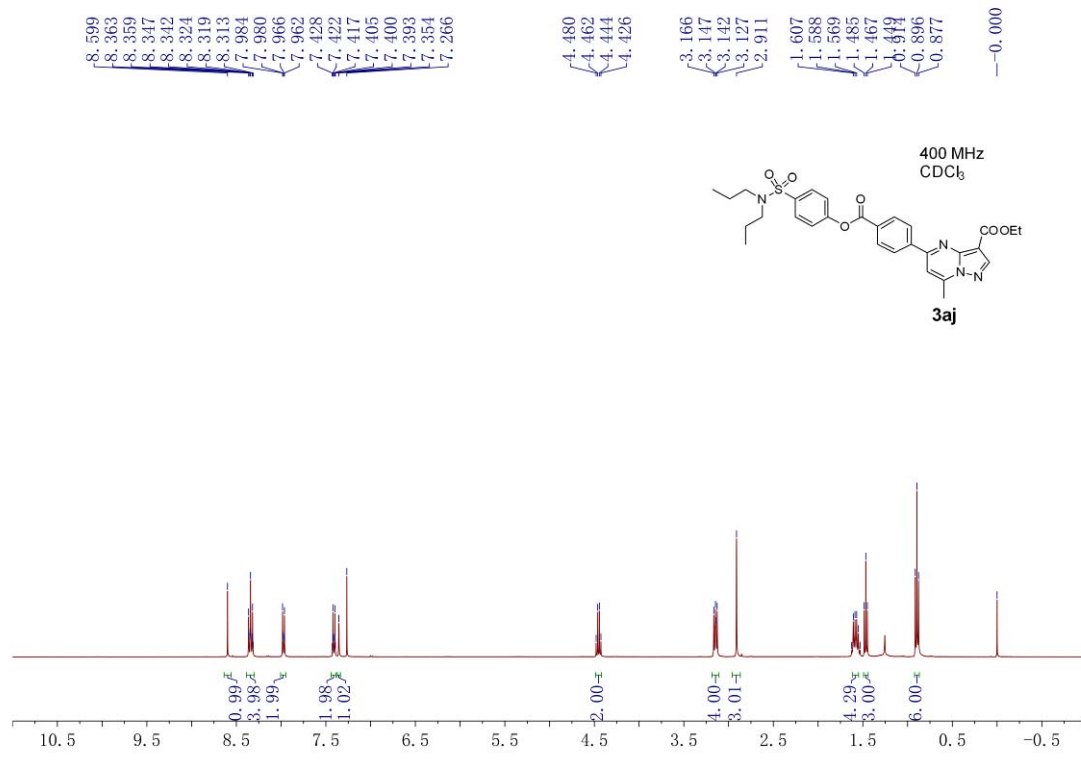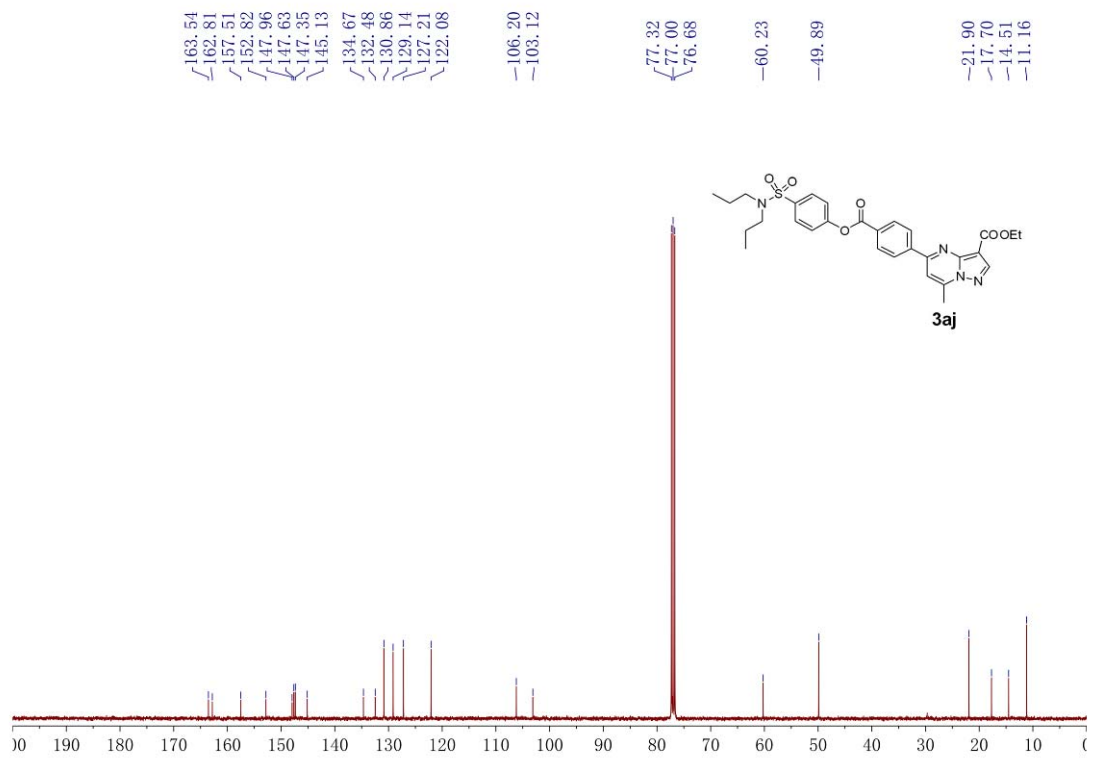





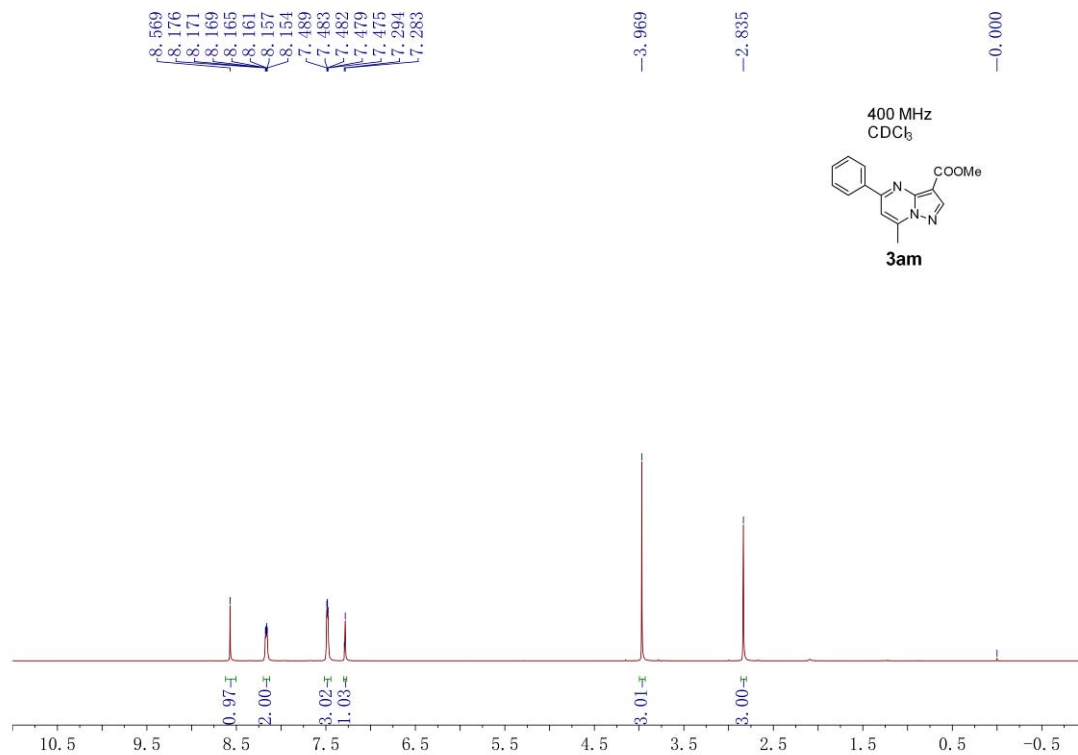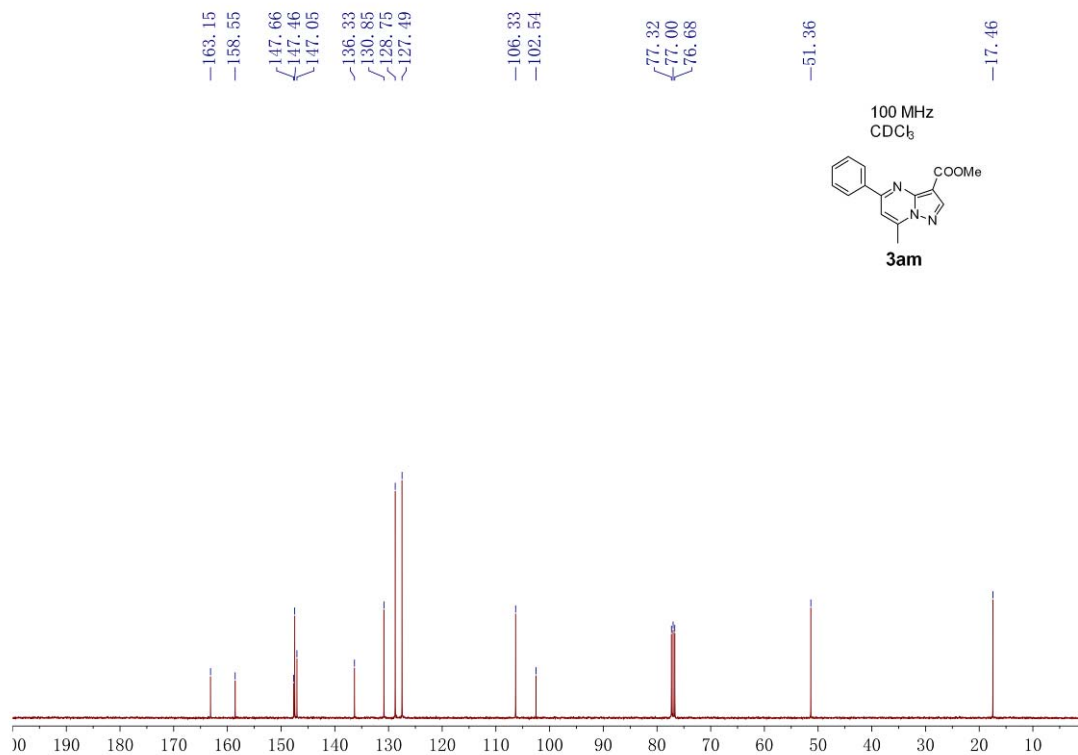

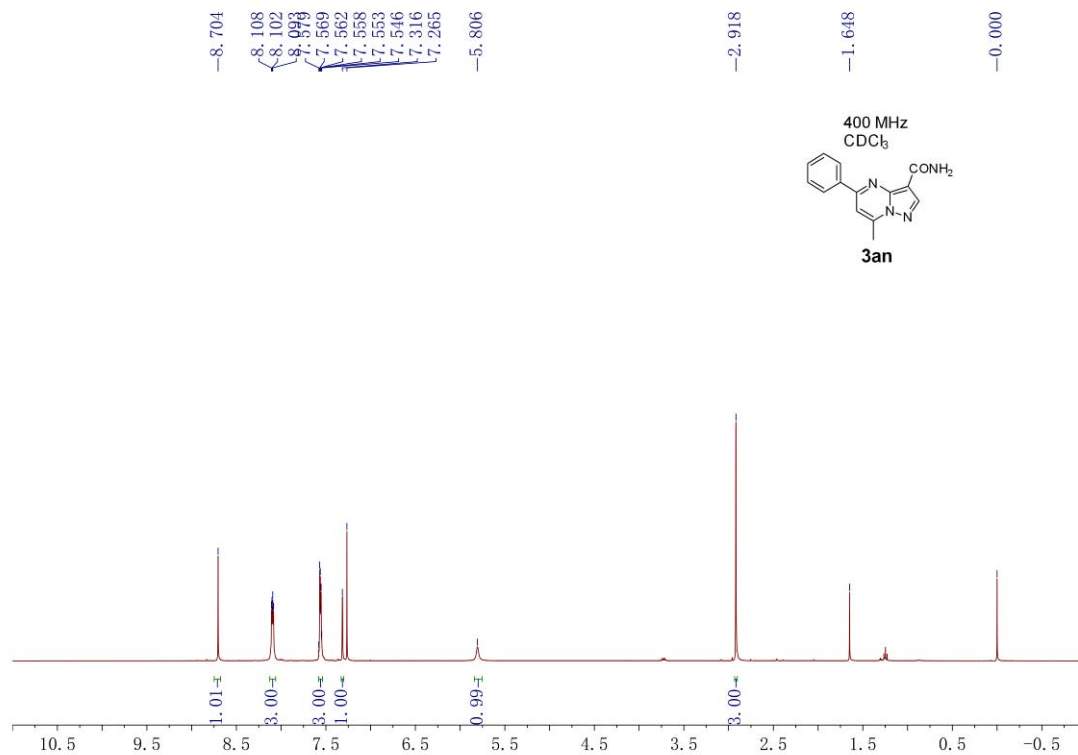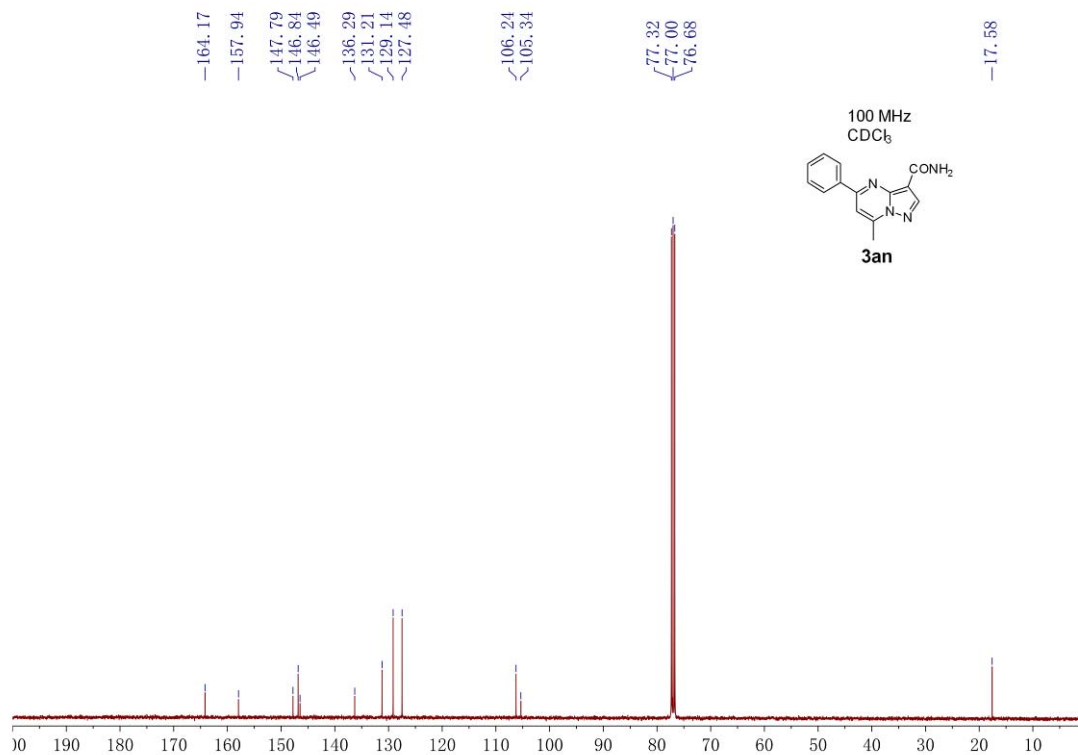

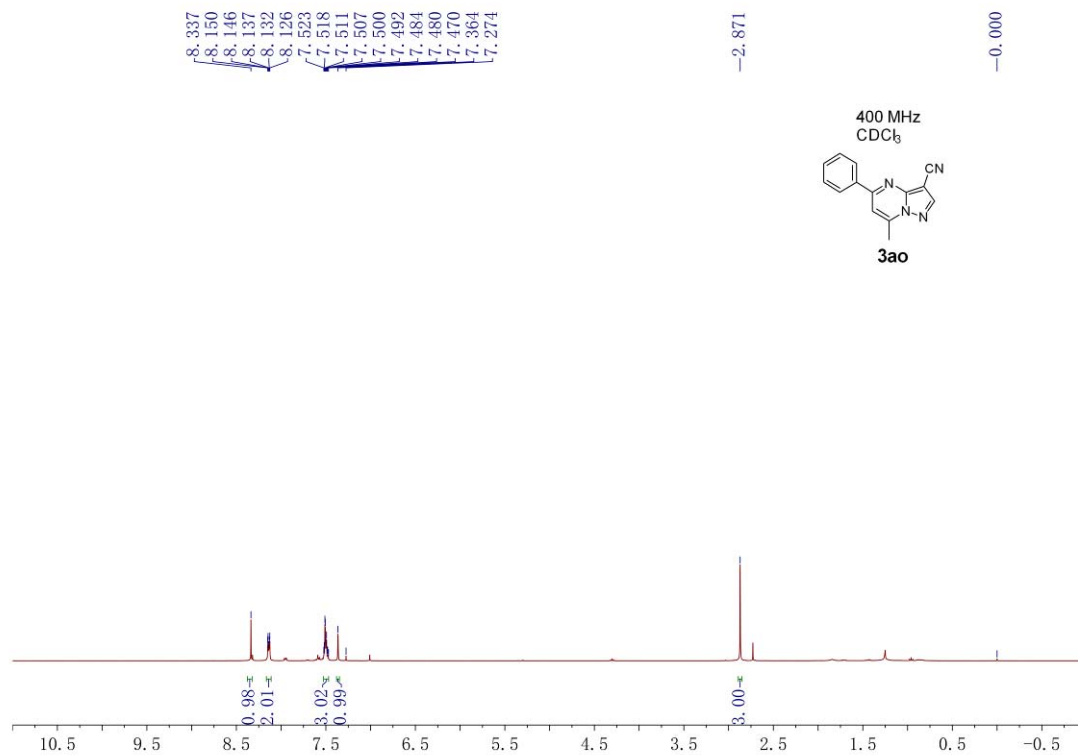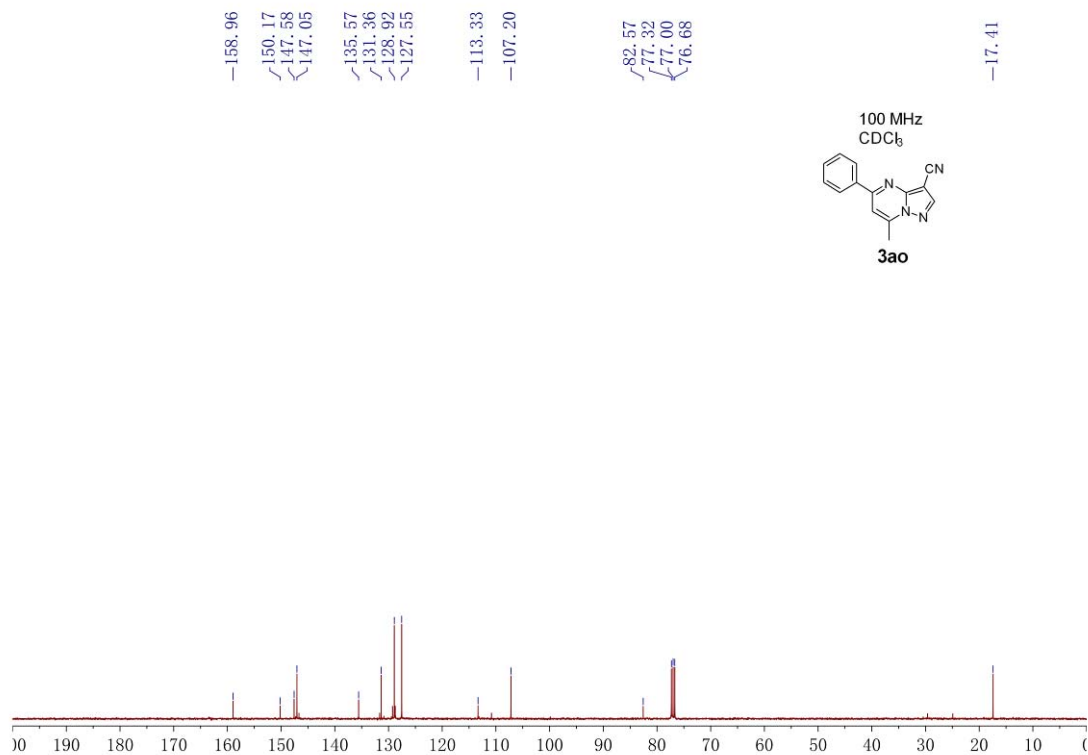



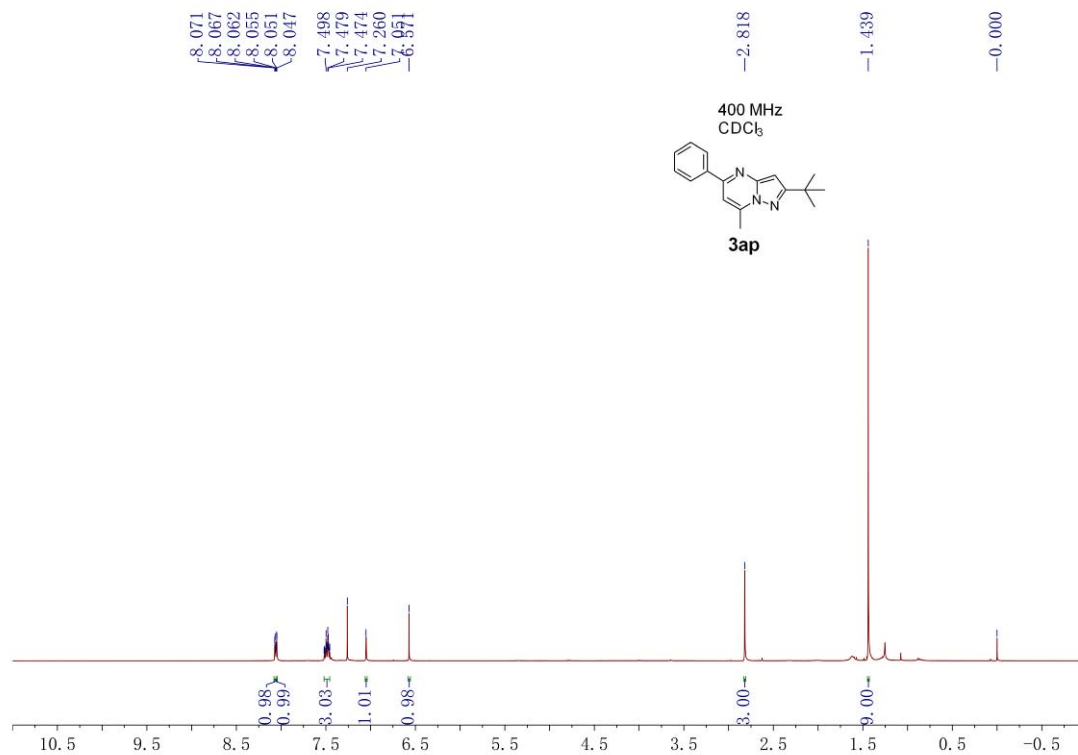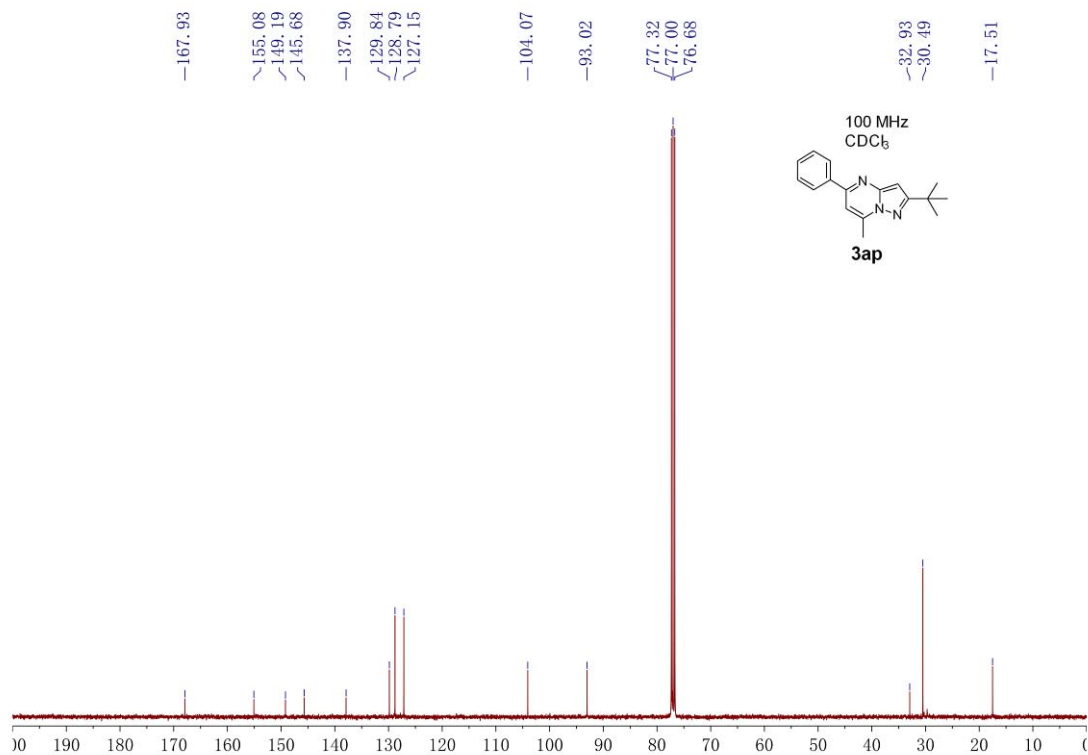

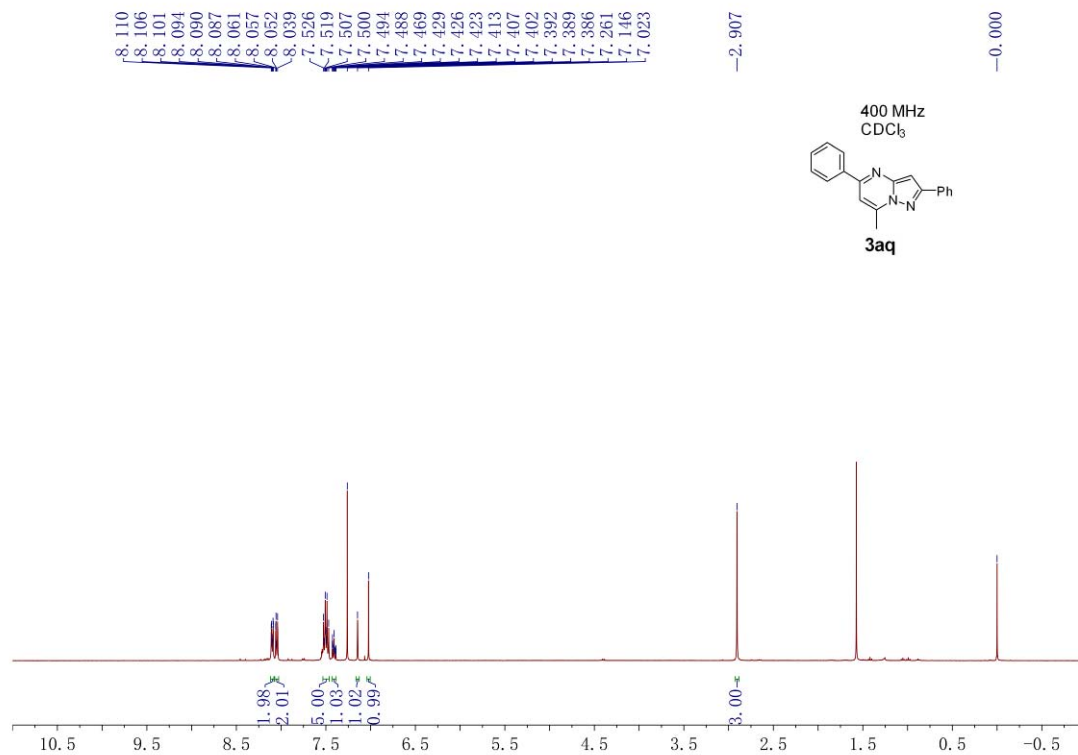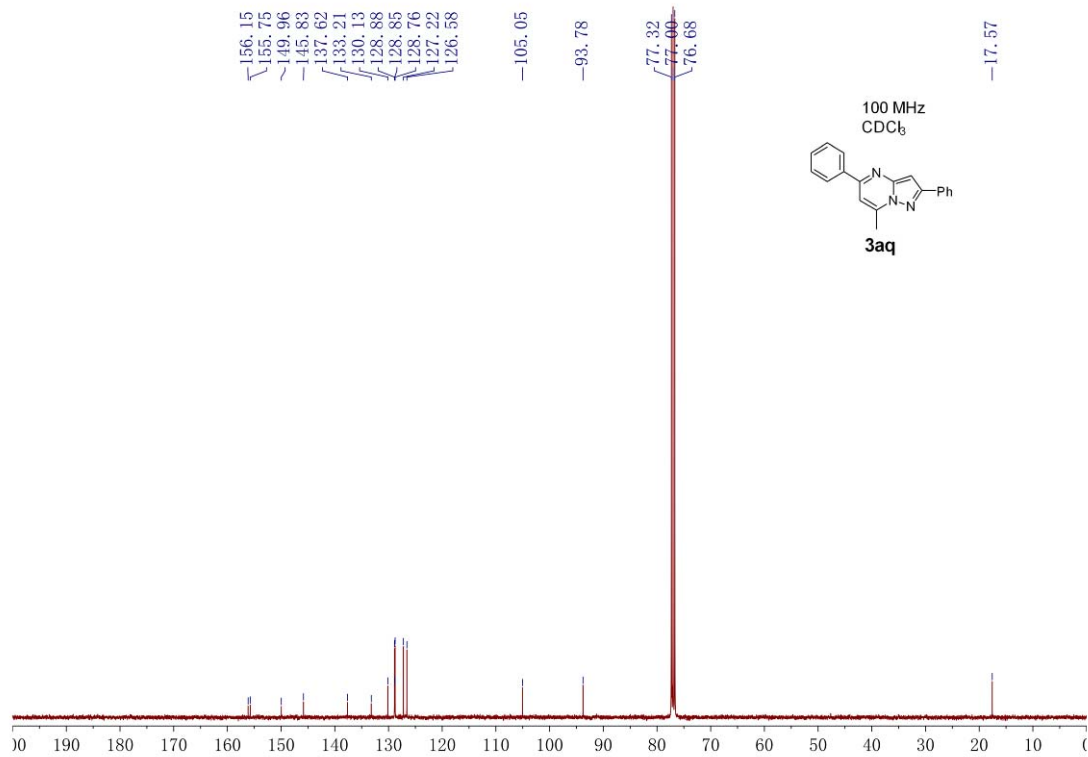

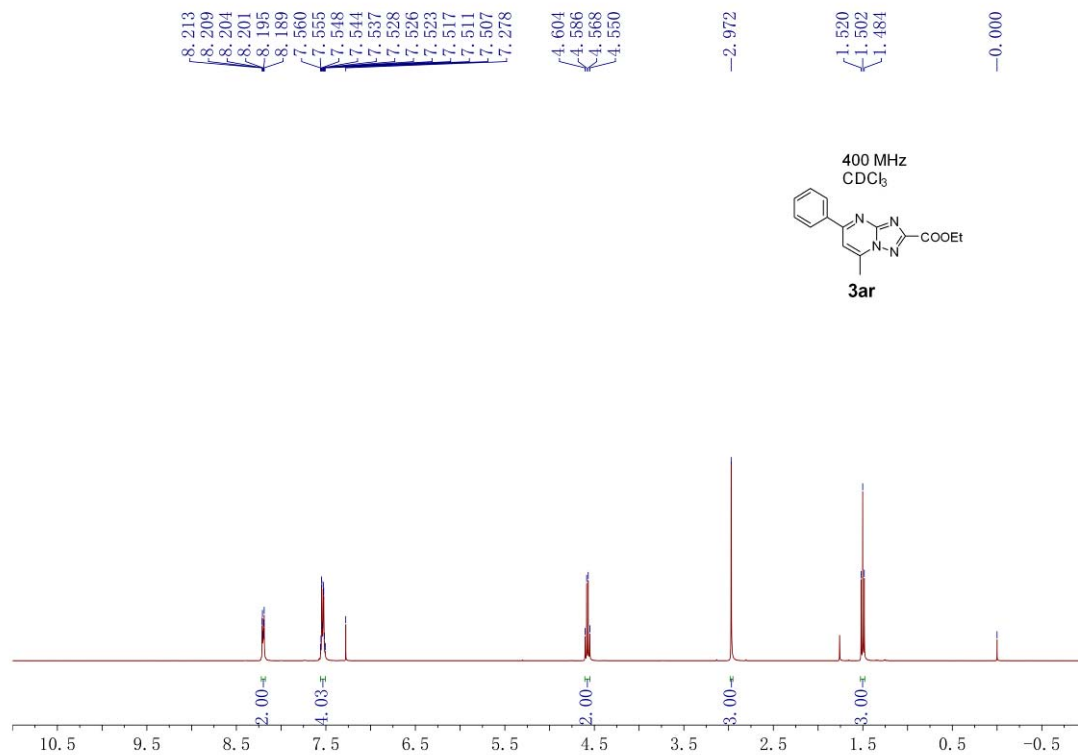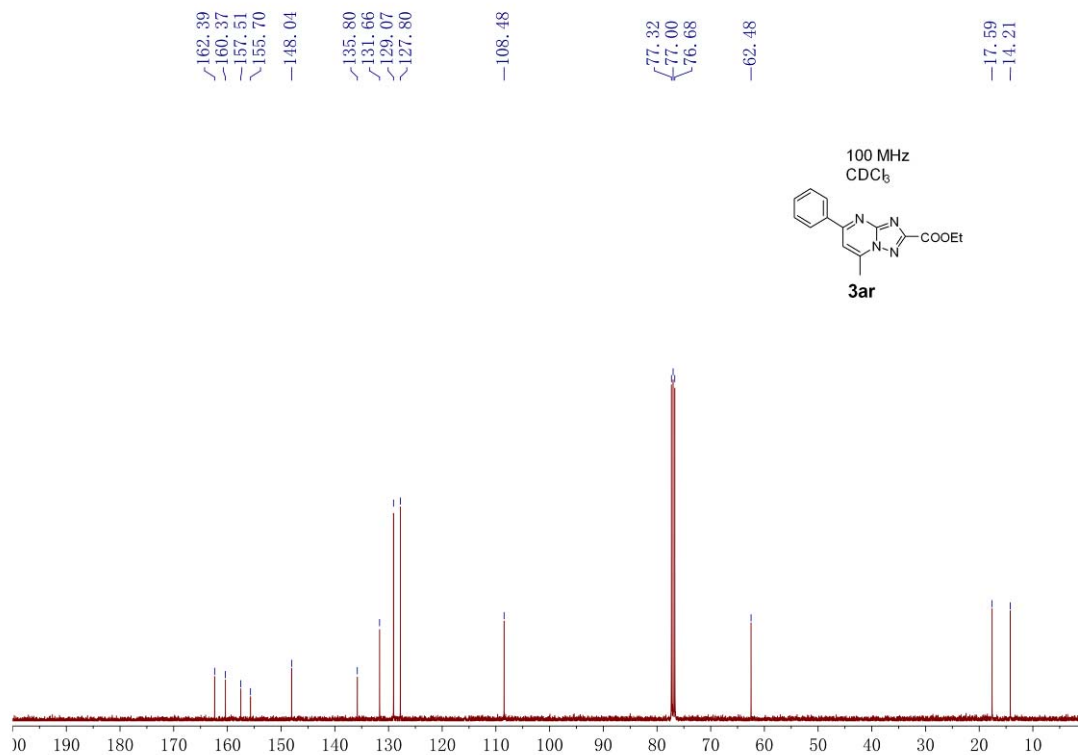

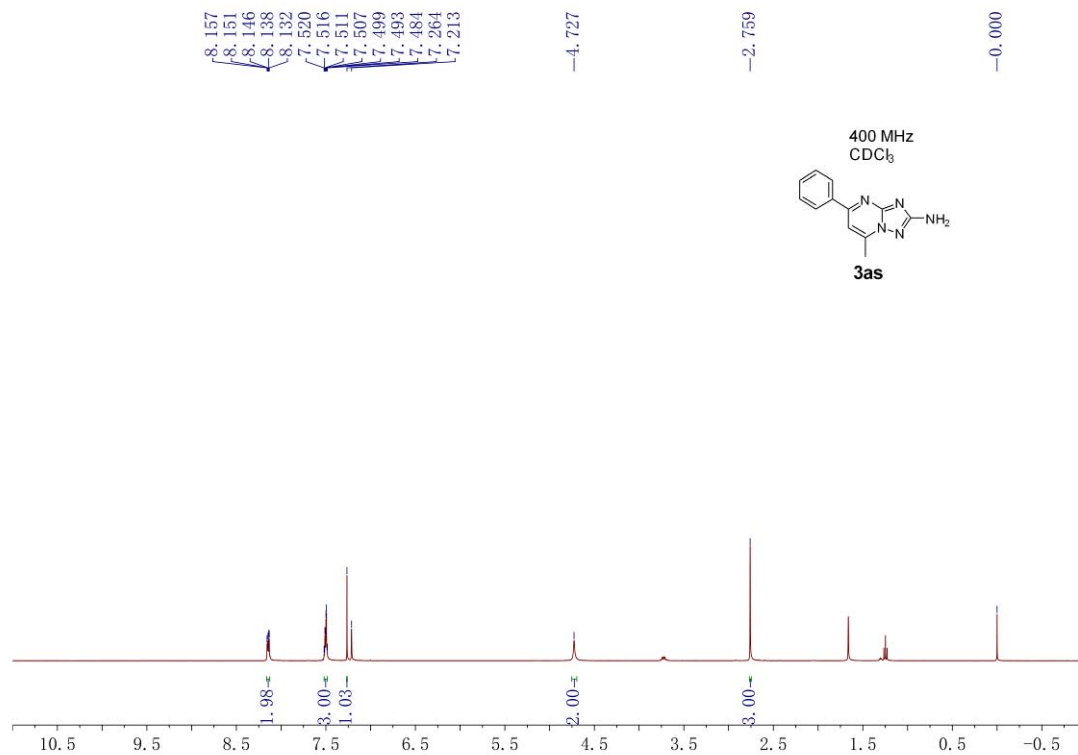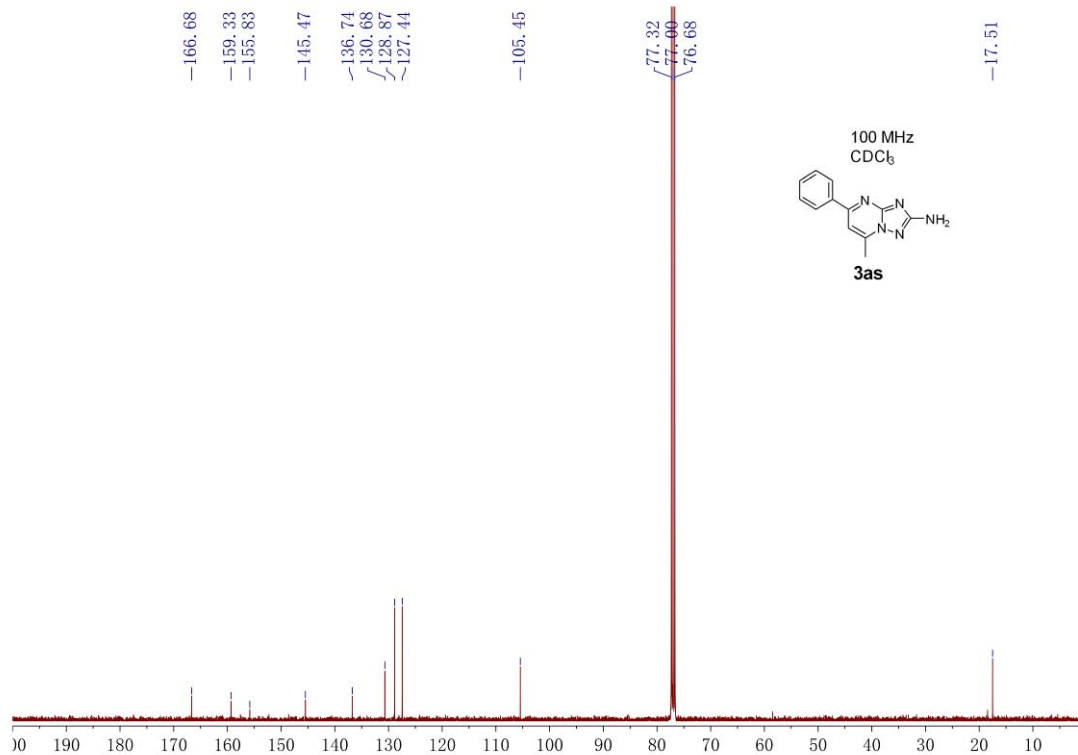

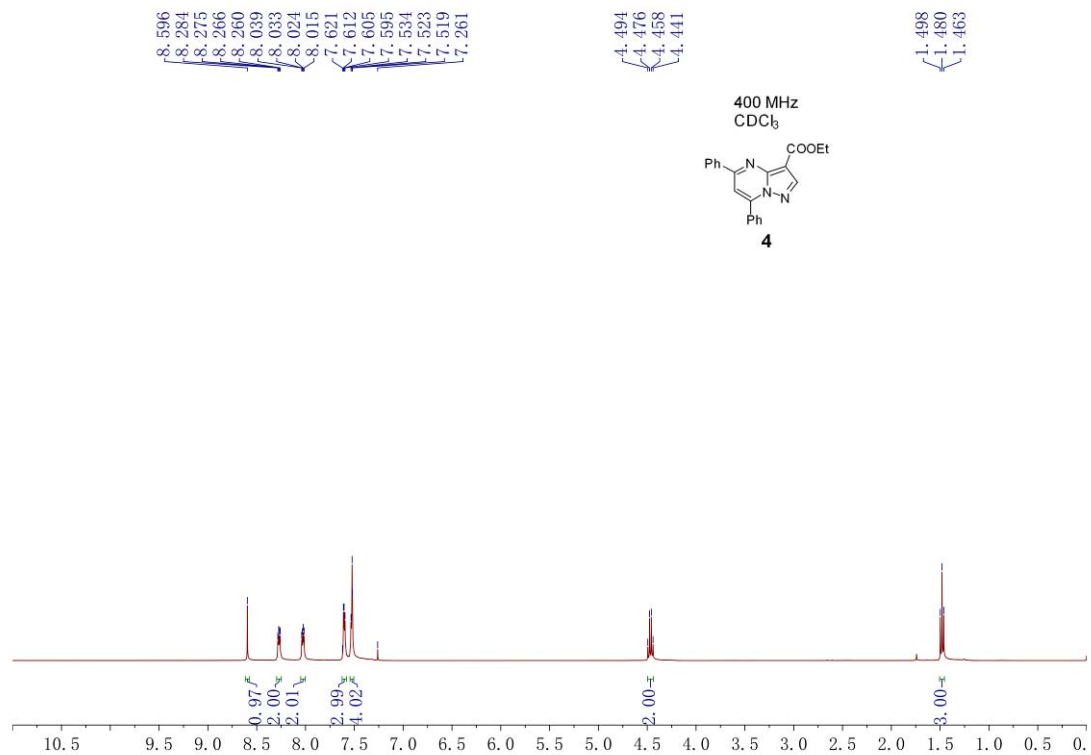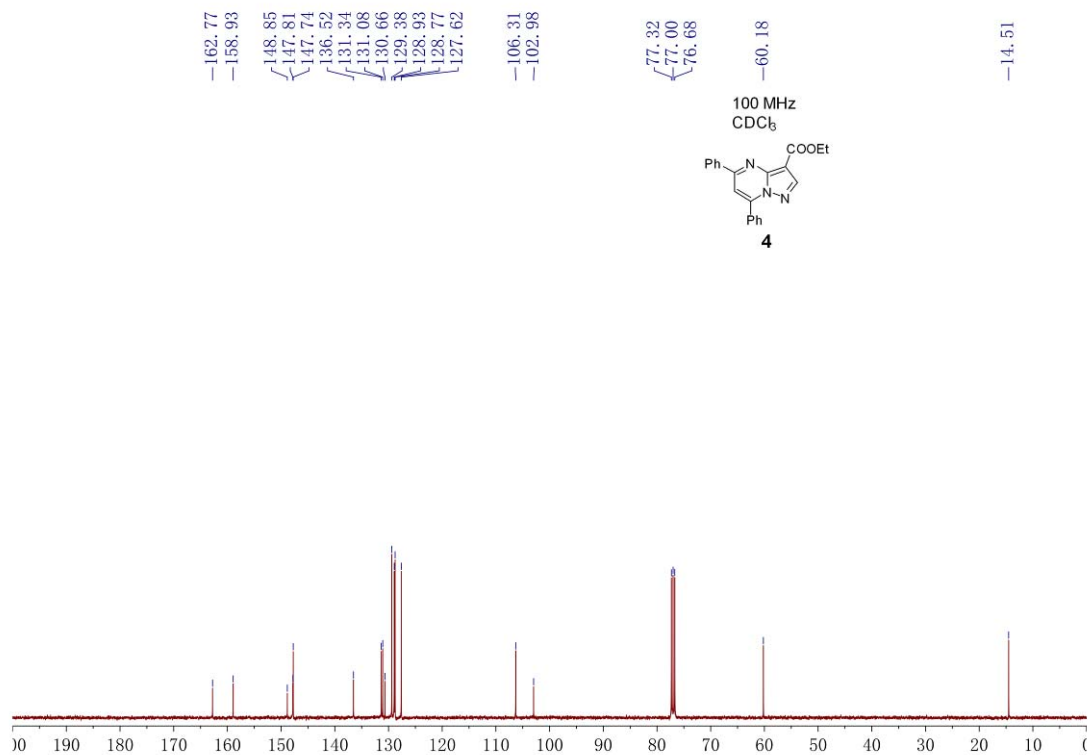

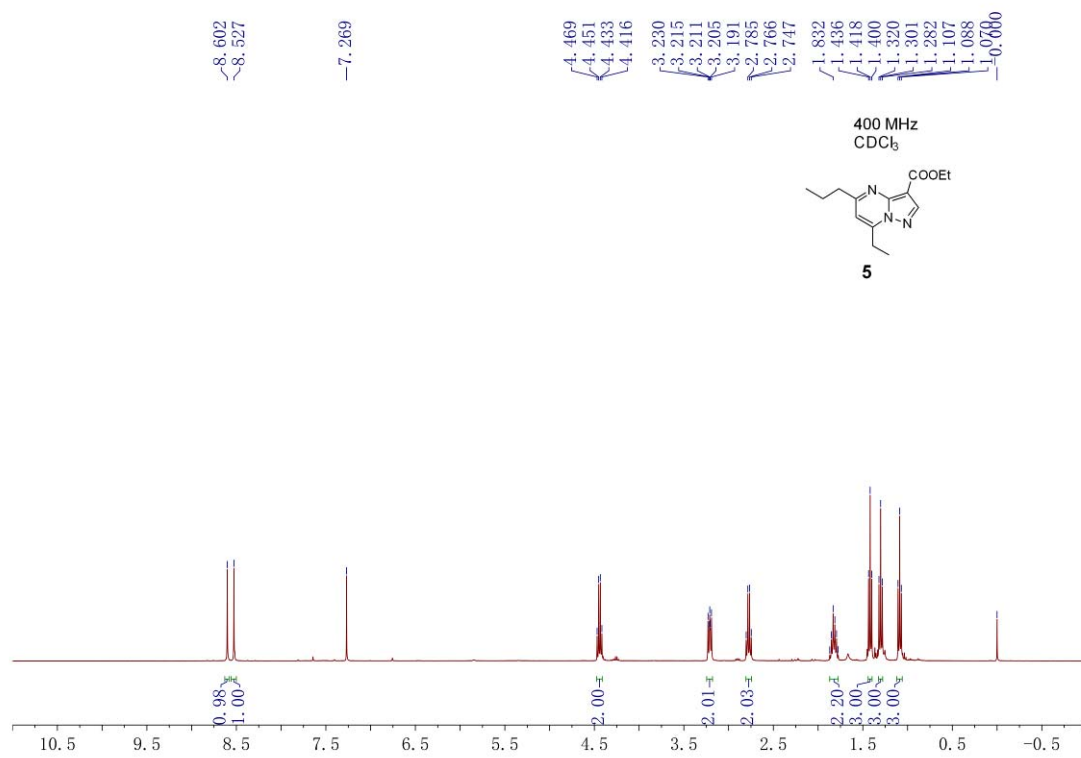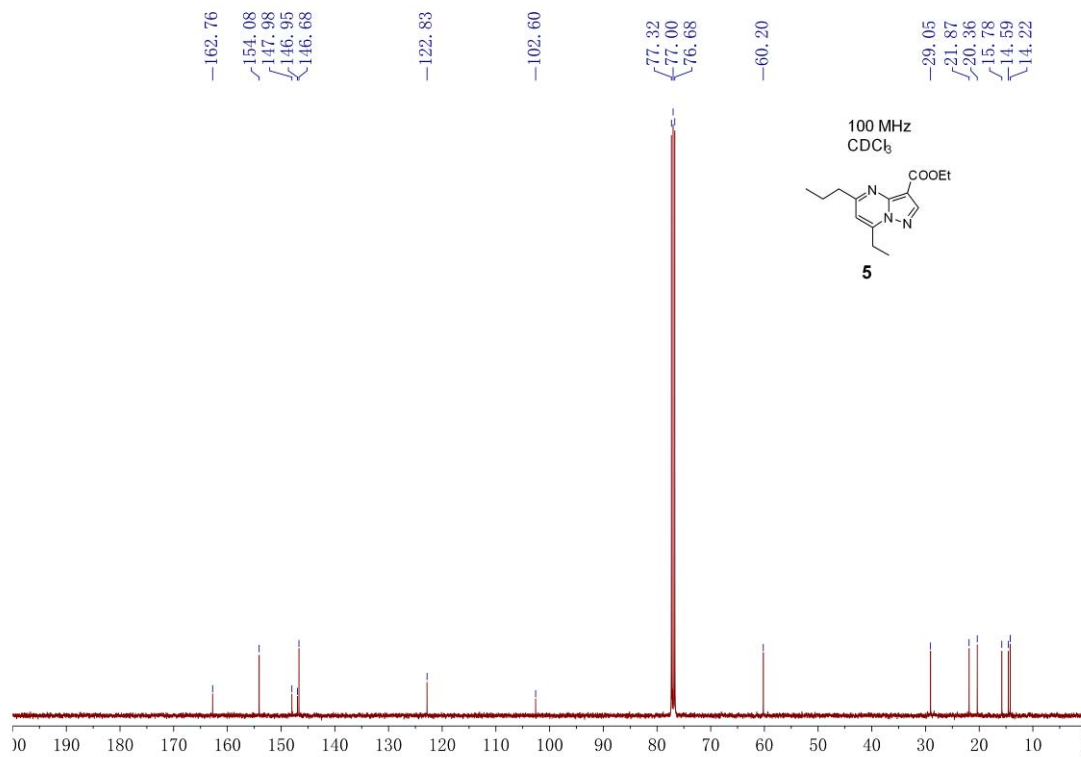

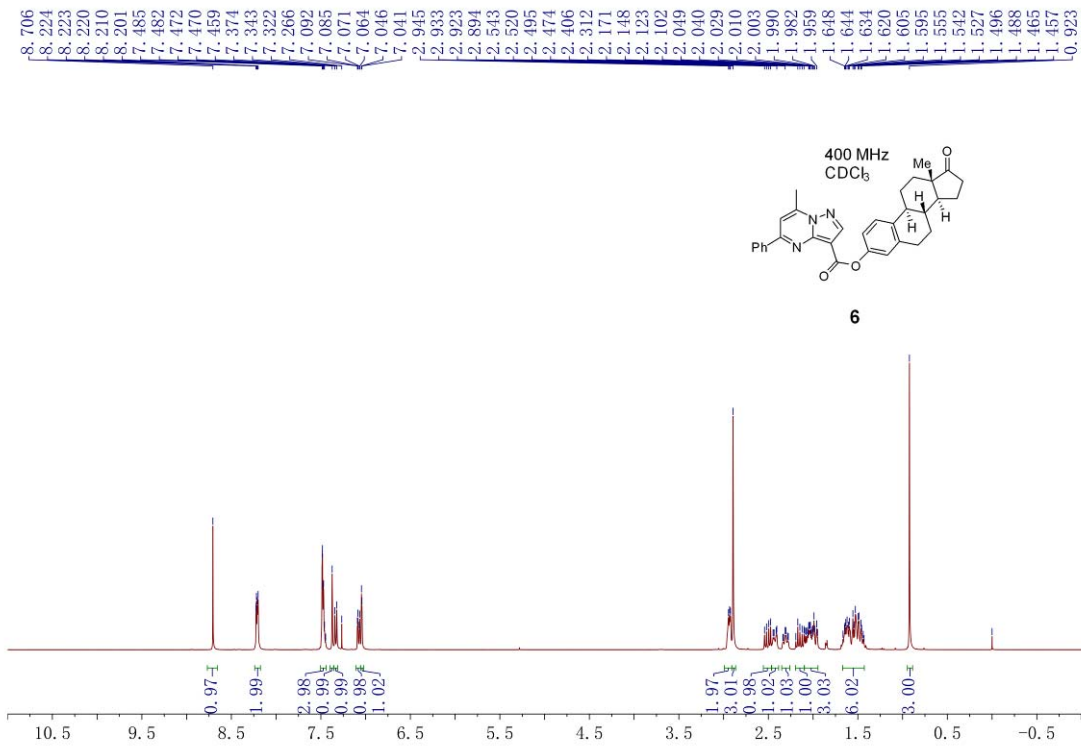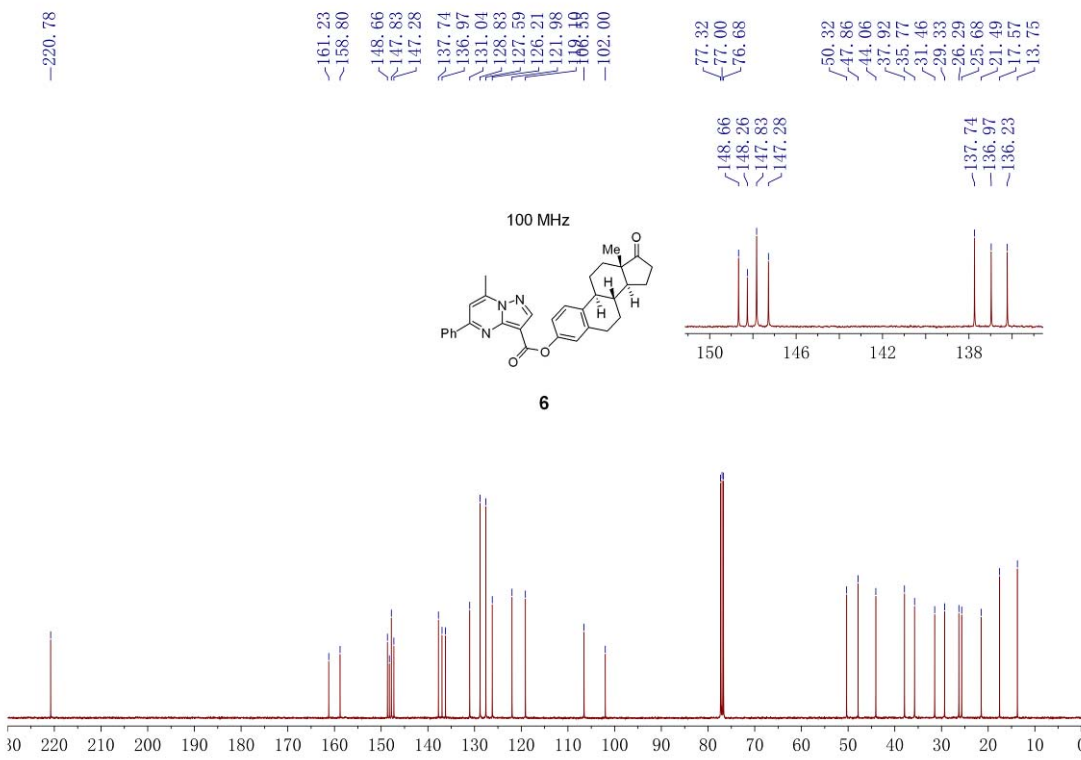

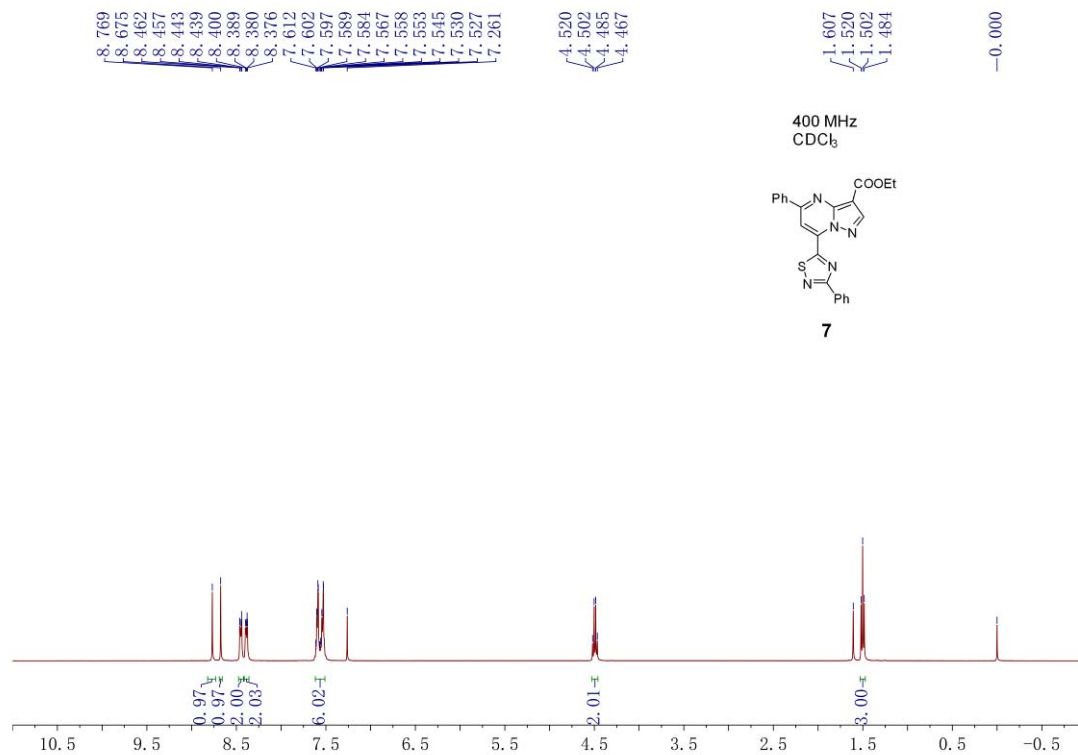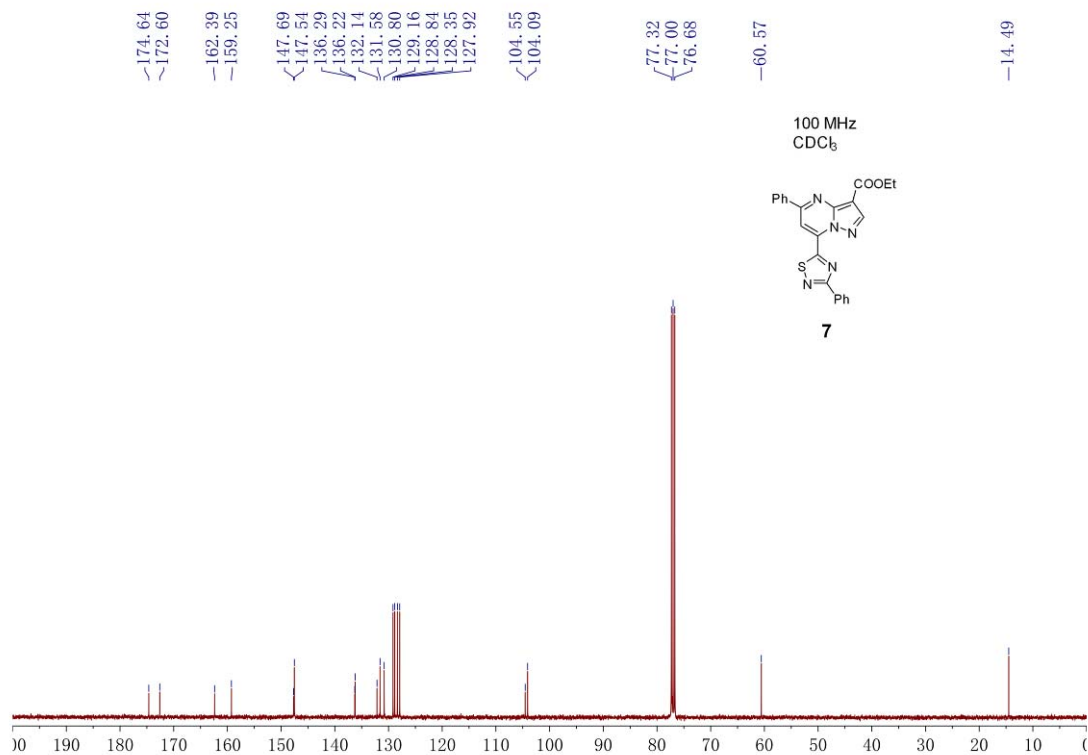



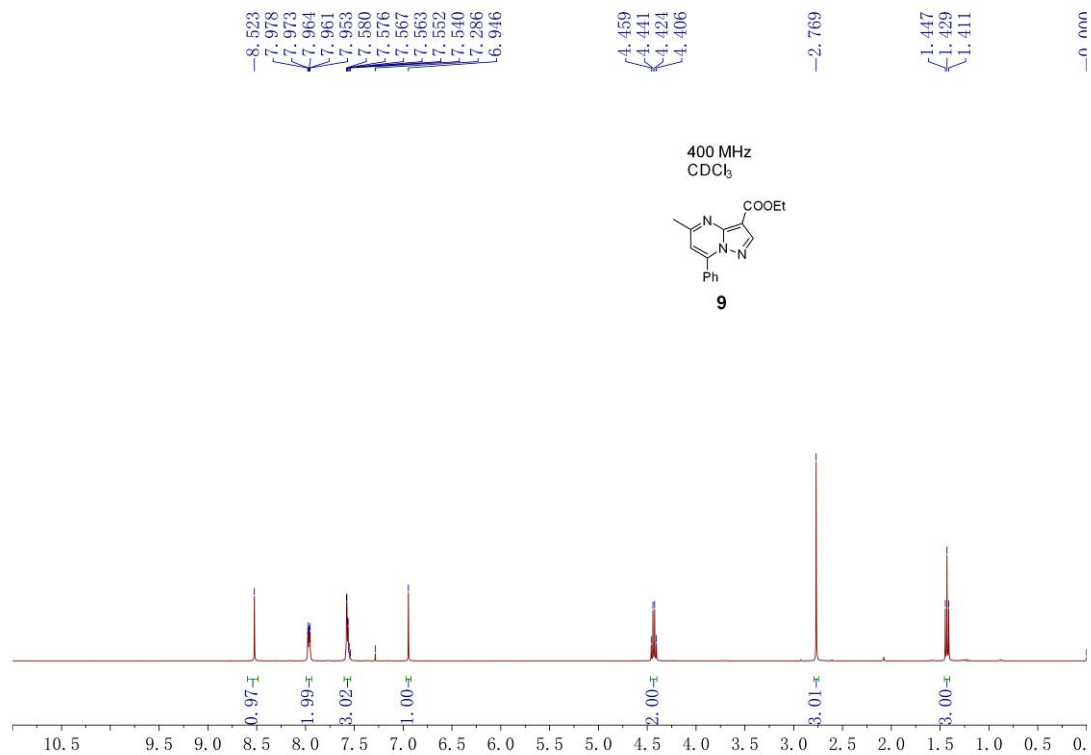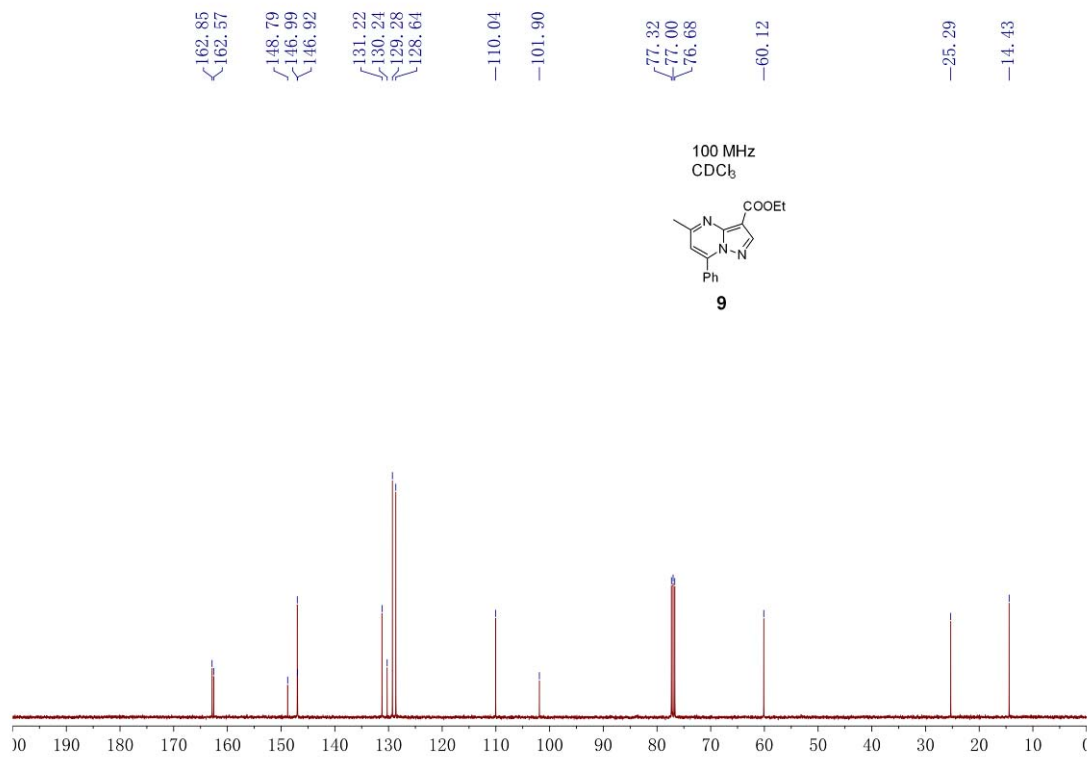

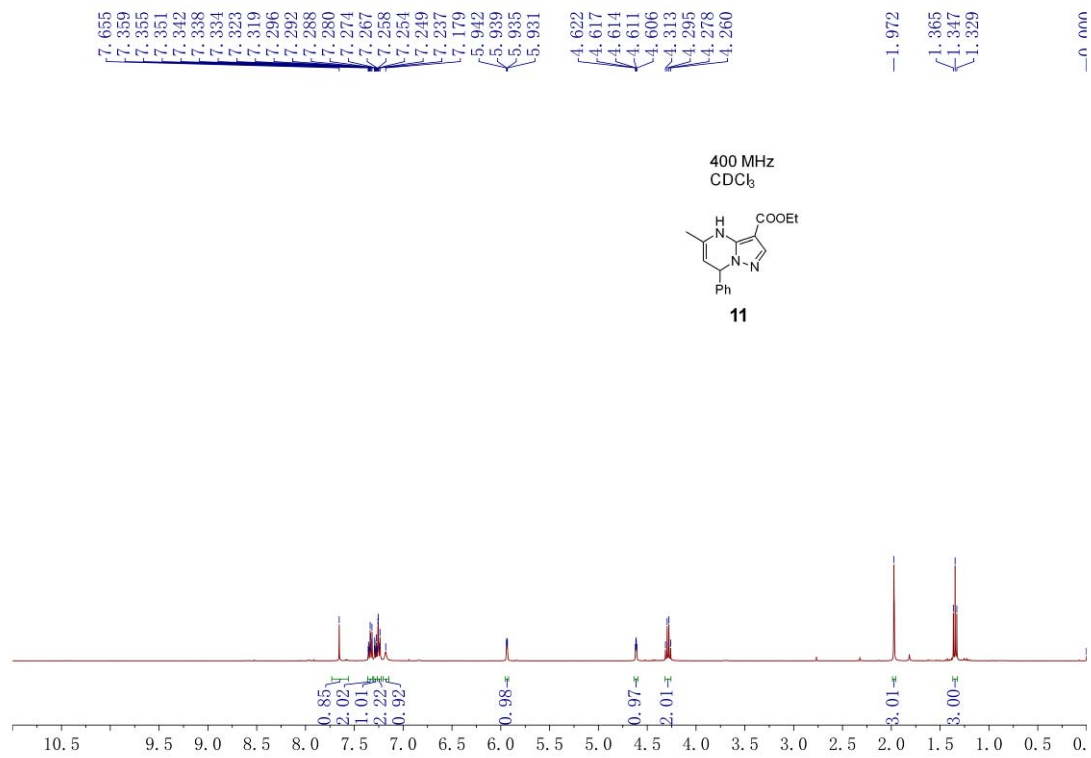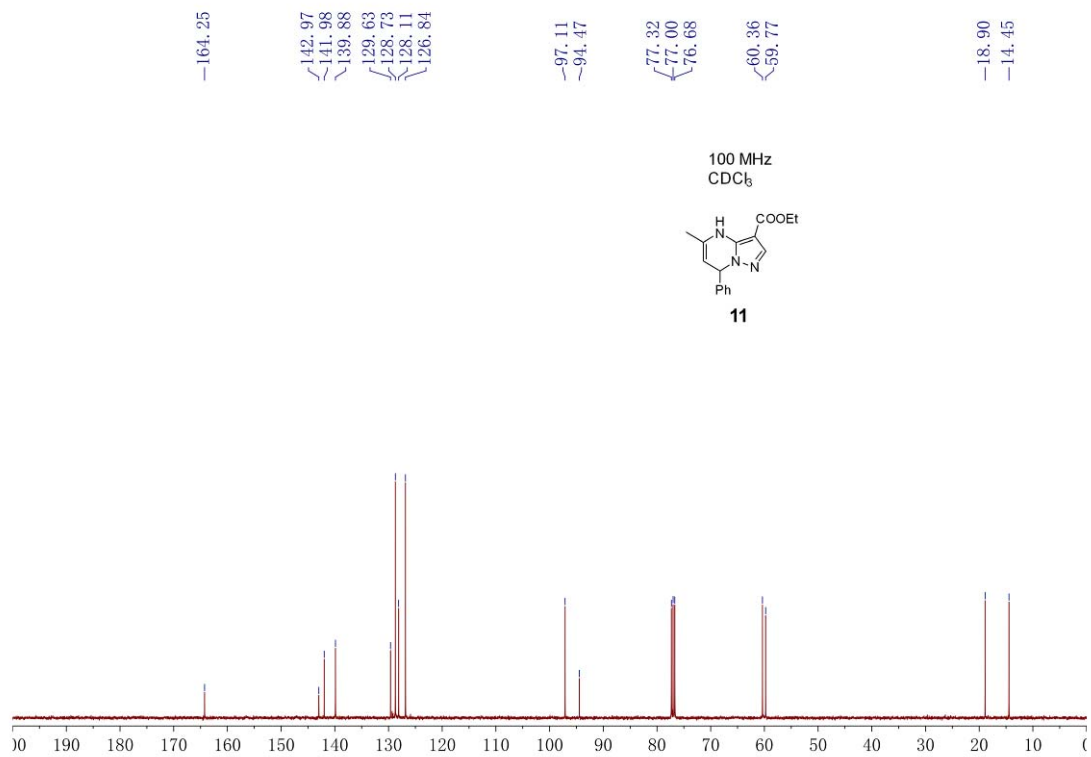

Supplement: d2qo00381c1.pdf [file d2qo00381c1.pdf]
